# Supplementary material for: Graphite oxide: a metal free highly efficient carbocatalyst for the synthesis of 1,5-benzodiazepines under room temperature and solvent free heating conditions
Source: Royal Society of Chemistry journal article supplement (doi:10.1039/c6gc03110b), 2017-01-01

## SUPPLEMENTARY MATERIALS

### **Graphite Oxide a metal free highly efficient carbocatalyst for the synthesis of 1,5-benzodiazepines under room temperature and solvent free heating condition**

**Ramen Jamatia,<sup>a</sup> Ajay Gupta,<sup>a</sup> Binoyargha Dam,<sup>a</sup> Mithu Saha<sup>b</sup> and Amarta Kumar Pal\*<sup>a</sup>**

*<sup>a</sup>Department of Chemistry, Centre for Advanced Studies, North-Eastern Hill University, Shillong-793022, India.*

Tel: +91 364 2307930 ext 2636, E-mail: [amartya\\_pal22@yahoo.com](mailto:amartya_pal22@yahoo.com), [akpal@nehu.ac.in](mailto:akpal@nehu.ac.in)

Fax: +91 364 2550076

*<sup>b</sup>State Key laboratory of Physical Chemistry for Solid Surfaces, Department of Chemistry, College of Chemistry and Chemical Engineering, Xiamen University, Xiamen 361005, P. R. China.*

| <b>Table of content</b>                                                               | <b>Page No.</b> |
|---------------------------------------------------------------------------------------|-----------------|
| 1. Experimental Section                                                               | 2-5             |
| 2. <b>Table S.I. 1.</b> X-ray crystallography data for compound <b>3k</b>             | 6-7             |
| 3. Spectral data of the compound <b>3a-3v &amp; 5a-5g</b>                             | 7-25            |
| 4. <sup>1</sup> H & <sup>13</sup> C NMR Spectra of compounds <b>3a-3v &amp; 5a-5g</b> | 26-54           |

## Experimental

Melting points were determined in open capillaries and are uncorrected. IR spectra were recorded on Spectrum BX FT-IR, Perkin Elmer ( $\nu_{\max}$  in  $\text{cm}^{-1}$ ) on KBr disks.  $^1\text{H}$  NMR and  $^{13}\text{C}$  NMR (400 MHz and 100 MHz respectively) spectra were recorded on Bruker Avance II-400 spectrometer in  $\text{CDCl}_3$  (chemical shifts in  $\delta$  with TMS as internal standard). Mass spectra were recorded on Waters ZQ-4000. Transmission Electron Microscope (TEM) was recorded on JEOL JSM 100CX. Scanning electron microscope (SEM) and Energy Dispersive X-ray (EDX) was recorded on JSM-6360 (JEOL). Thermogravimetric analysis (TGA) was recorded on a Perkin Elmer Precisely STA 6000 simultaneous thermal analyzer. CHN were recorded on CHN-OS analyzer (Perkin Elmer 2400, Series II). Powder XRD was recorded on Bruker D8 Advance XRD instrument SWAX. Raman analysis was carried out on a Horiba Jobin Vyon, Model LabRam HR. X-Ray Photoelectron Spectroscopy (XPS) was recorded on a PHI 5000 Versa Prob II, FEI Inc. Silica gel G (E-merck, India) was used for TLC. Hexane refers to the fraction boiling between 60 °C and 80 °C.

### X-ray crystallography

The X-ray diffraction data were collected at 293 K with Mo  $K\alpha$  radiation ( $\lambda = 0.71073 \text{ \AA}$ ) using Agilent Xcalibur (Eos, Gemini) diffractometer equipped with a graphite monochromator. The software used for data collection CrysAlis PRO (Agilent, 2011), data reduction CrysAlis PRO and cell refinement CrysAlis PRO. The structure were solved by direct methods and refined by full-matrix least-squares calculation using SHELXS-97 and SHELXL-97.

### Transmission Electron Microscope (TEM)

Transmission Electron Microscope (TEM) was recorded on JEOL JSM 100CX. The GO was placed over the carbon coated copper grid which was then followed by analysis in TEM with Acc. Volt.: 200kV and camera length 250 mm.

#### **Scanning electron microscope (SEM) and Energy Dispersive X-ray (EDX)**

Scanning electron microscope (SEM) was recorded on JSM-6360 (JEOL) equipped with Energy Dispersive X-ray (EDX) spectrometer INCA PentaFETx3. The GO was mounted over a conducting tape and coated with Au in vacuum after which the sample was analyzed in SEM with Accelerating Voltage: 15-20kV.

#### **Powder XRD**

Powder XRD was recorded on Bruker D8 Advance XRD instrument SWAX. The operation voltage supplied was 40 kV and the current was 40mA. The source was Cu K (alpha) with wavelength = 1.54 Angstrom.

#### **Thermogravimetric analysis (TGA)**

Thermogravimetric analysis (TGA) was recorded on a Perkin Elmer Precisely STA 6000 simultaneous thermal analyser. The TGA analysis was performed under nitrogen atmosphere at a heating rate of 20 °C per minute.

#### **Raman analysis**

Raman analysis was carried out on a Horiba Jobin Vyon, Model LabRam HR. X-Ray

#### **Photoelectron Spectroscopy (XPS)**

Photoelectron Spectroscopy (XPS) was recorded on a PHI 5000 Versa Prob II, FEI Inc. with pass setting of: 23.5 eV, step: 0.025 eV, time per step: 50 ms, average: 10 cycle, X-Ray: 100uC15KV25W.

### **Preparation of graphite oxide (GO)**

Graphite Oxide (GO) was prepared according to the modified Hummer's method from graphite powder.<sup>15</sup> 1 gm of graphite (Sigma-Aldrich) and sodium nitrate (0.5 gm) was added in 20 mL of concentrated sulfuric acid (H<sub>2</sub>SO<sub>4</sub>, 98 %). The resulting solution was kept in an ice bath and a total of 4 gm of potassium permanganate (KMnO<sub>4</sub>) was added slowly in portions over an hour under stirring to avoid any explosion. After the completion of addition, the reaction mixture was allowed to stir a further period of an hour. The mixture was then heated slowly to 45 °C and stirred maintaining the temperature for another hour (Observation: a thick brown paste is obtained at this stage). After the completion of the time mentioned, 20 mL of deionized (DI) water was added and heated (45 °C) for another 30 min. Finally 180 mL of DI water was mixed followed by dropwise addition of hydrogen peroxide (H<sub>2</sub>O<sub>2</sub>, 30 %) until the colour of the solution changes from dark brown to yellowish brown. The prepared graphite oxide was then recovered by centrifugation, washing with DI water (3 X 10 mL), EtOH (3 X 10 mL) and finally with diethylether (3 X 10 mL). After the washing, the graphite oxide was allowed to dry under vacuum to obtain a yellowish brown powder.

### **Procedure of compounds 3a-v & 5a-g:**

#### **(a) Under roomtemperature stirring:**

A mixture of diamines (**1a-c**, 1mmol),  $\alpha,\beta$ -unsaturated ketones (**2a-m**, 1mmol) or normal ketones (**4a-e**, 2.1 mmol), GO (20 mg) and EtOH (5 mL) was taken in a round bottom flask and stirred at room temperature for 7 h. After completion of 7 h, the reaction mixture was centrifuged and filtered. The catalyst (GO) was recovered from residue and the filtrate containing ethanol was removed under vacuum. Then the crude mass was dissolved in ethylacetate (10 mL). The

ethyl acetate layer was then washed with water (3 X 10 mL), brine (1 X 10 mL) and dried over anhydrous Na<sub>2</sub>SO<sub>4</sub>. The reaction mixture was then concentrated under vacuum and the crude reaction mass purified by column chromatography using ethylacetate-hexane as the eluent.

**(b) Under solvent free condition:**

A mixture of diamines (**1a-c**, 1mmol),  $\alpha,\beta$ -unsaturated ketones (**2a-m**, 1mmol) or normal ketones (**4a-e**, 2.1 mmol), and GO (20 mg) was taken in beaker and mixed well and transferred in to a r.b. The r.b was placed in a pre-heated oil bath at 80 °C and stirred for 30 min. After that, the crude reaction mass was dissolved in ethylacetate (10 mL). To recover the GO, ethyl acetate portion was centrifuged and filtered. From the residue, GO was isolated and the filtrate (ethyl acetate layer) was then washed with water (3 X 10 mL), brine (1 X 10 mL) and dried over anhydrous Na<sub>2</sub>SO<sub>4</sub>. The reaction mixture was then concentrated under vacuum and purified by column chromatography using ethylacetate-hexane as the eluent.

**Procedure for catalyst recycling**

After centrifugation and filtration, the residue containing GO was carefully washed with deionised water (2 X 5 mL), ethanol (2 X 5 mL), diethyl ether (2 X 5 mL) and dried under vacuum. The recovered GO was then used for another run under the same experimental conditions.

**Table S.I.1.** X-ray crystallography data for compound **3k** (CCDC 1425946).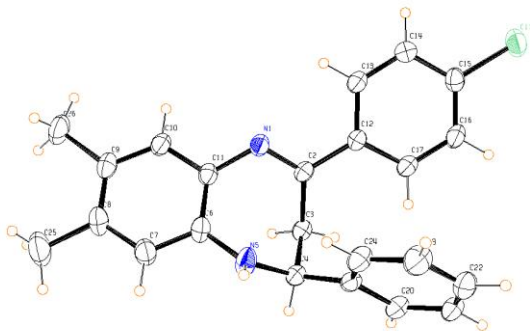

|                                                    |                     |
|----------------------------------------------------|---------------------|
| Empirical formula                                  | $C_{23}H_{21}ClN_2$ |
| Formula weight                                     | 360.89              |
| Crystal system                                     | Triclinic           |
| Space group                                        | <i>P</i> -1         |
| $a$ (Å)                                            | 6.0657(4)           |
| $b$ (Å)                                            | 11.6494(10)         |
| $c$ (Å)                                            | 14.2527(12)         |
| $\alpha$ (°)                                       | 104.148(7)          |
| $\beta$ (°)                                        | 102.007(6)          |
| $\gamma$ (°)                                       | 92.918(6)           |
| Volume (Å <sup>3</sup> )                           | 949.69(14)          |
| T(K)                                               | 296.9(6)            |
| Absorption coefficient ( $\mu$ /mm <sup>-1</sup> ) | 0.210               |
| Total reflection collected                         | 6931                |

|                                         |                                  |
|-----------------------------------------|----------------------------------|
| Independent reflection                  | 4235                             |
| $\theta$ range ( $^{\circ}$ )           | 6.06 to 57.44                    |
| Final R Indexes [ $1 \geq 2\sigma(I)$ ] | $R_1 = 0.0567$ , $wR_2 = N/A$    |
| Final R indexes [all data]              | $R_1 = 0.0846$ , $wR_2 = 0.1384$ |
| Goodness-of-fit on $F^2$                | 1.048                            |

### SPECTRAL DATA

1. 2,4-diphenyl-2,3-dihydro-1*H*-benzo[*b*][1,4]diazepine

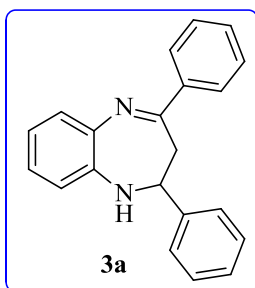

Yellow orange solid. mp = 131-132  $^{\circ}\text{C}$ . IR (KBr): 3241, 3060, 1610, 1592, 1446  $\text{cm}^{-1}$ .  $^1\text{H}$  NMR ( $\text{CDCl}_3$ , 400 MHz):  $\delta$  = 7.84 (d,  $J$  = 6.4 Hz, 2H), 7.42-7.28 (m, 9H), 7.06-7.01 (m, 2H), 6.82 (d,  $J$  = 7.6 Hz, 1H), 5.19 (dd,  $J$  = 8.4, 3.6 Hz, 1H), 3.77 (s, 1H), 3.25 (dd,  $J$  = 13.4, 3.8 Hz, 1H), 3.06 (dd,  $J$  = 13.6, 9.6 Hz, 1H).  $^{13}\text{C}$  NMR ( $\text{CDCl}_3$ , 100 MHz):  $\delta$  = 162.0, 139.7, 133.9, 133.0, 124.9, 123.7, 123.6, 123.1, 122.8, 121.7, 121.2, 120.7, 116.1, 115.4, 65.3, 32.5. ESI-MS:  $m/z$  299  $[\text{M}+\text{H}]^+$ . Anal. Calcd. for  $\text{C}_{21}\text{H}_{18}\text{N}_2$ : C, 84.53; H, 6.08; N, 9.39. Found : C, 84.34; H, 6.32; N, 9.21.

2. 2-(4-chlorophenyl)-4-phenyl-2,3-dihydro-1*H*-benzo[*b*][1,4]diazepine

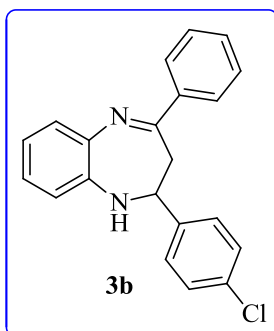

Light yellow solid. mp = 110-112 °C. IR (KBr): 3331, 3065, 1606, 1597, 1470  $\text{cm}^{-1}$ .  $^1\text{H}$  NMR ( $\text{CDCl}_3$ , 400 MHz):  $\delta$  = 7.81 (d,  $J$  = 7.2 Hz, 2H), 7.41-7.34 (m, 6H), 7.30-7.28 (m, 2H), 7.09-7.03 (m, 2H), 6.82 (d,  $J$  = 7.6 Hz, 1H), 5.22 (dd,  $J$  = 7.8, 3.0 Hz, 1H), 3.70 (s, 1H), 3.22 (dd,  $J$  = 13.6, 3.6 Hz, 1H), 3.05 (dd,  $J$  = 13.4, 8.6 Hz, 1H).  $^{13}\text{C}$  NMR ( $\text{CDCl}_3$ , 100 MHz):  $\delta$  = 167.1, 143.2, 139.4, 138.9, 137.9, 133.6, 130.2, 128.9, 128.8, 128.4, 127.4, 126.9, 126.5, 121.7, 120.7, 70.2, 37.3. ESI-MS:  $m/z$  333, 335  $[\text{M}+\text{H}]^+$ . Anal. Calcd. for  $\text{C}_{21}\text{H}_{17}\text{ClN}_2$ : C, 75.78; H, 5.15; N, 8.42. Found : C, 75.74; H, 4.98; N, 8.31.

3. 2-(4-bromophenyl)-4-phenyl-2,3-dihydro-1H-benzo[*b*][1,4]diazepine

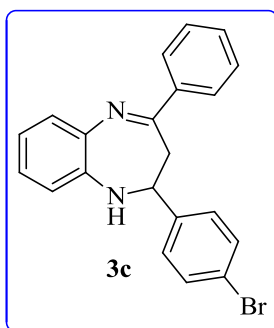

Yellow orange solid. mp = 103-104 °C. IR (KBr): 3365, 3057, 1614, 1573, 1470  $\text{cm}^{-1}$ .  $^1\text{H}$  NMR ( $\text{CDCl}_3$ , 400 MHz):  $\delta$  = 7.81 (d,  $J$  = 7.2 Hz, 2H), 7.46-7.29 (m, 8H), 7.09-7.03



(m, 2H), 6.82 (d,  $J = 7.6$  Hz, 1H), 5.21 (dd,  $J = 8.2, 4.2$  Hz, 1H), 3.70 (s, 1H), 3.22 (dd,  $J = 13.4, 5.0$  Hz, 1H), 3.04 (dd,  $J = 13.4, 8.6$  Hz, 1H).  $^{13}\text{C}$  NMR ( $\text{CDCl}_3$ , 100 MHz):  $\delta = 166.6, 143.2, 138.9, 138.4, 137.4, 131.4, 129.7, 128.3, 127.9, 127.2, 126.4, 126.0, 121.25, 121.22, 120.2, 69.7, 36.8$ . ESI-MS:  $m/z$  377, 379  $[\text{M}+\text{H}]^+$ . Anal. Calcd. for  $\text{C}_{21}\text{H}_{17}\text{BrN}_2$ : C, 66.85; H, 4.54; N, 7.43. Found : C, 67.07; H, 4.45; N, 7.28.

4. 4-phenyl-2-(p-tolyl)-2,3-dihydro-1*H*-benzo[*b*][1,4]diazepine

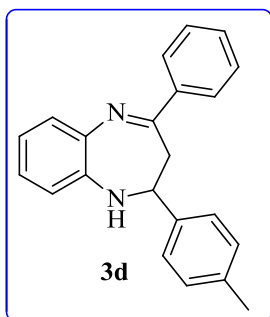

Yellow solid. mp = 78-80 °C. IR (KBr): 3228, 3056, 1608, 1579, 1445  $\text{cm}^{-1}$ .  $^1\text{H}$  NMR ( $\text{CDCl}_3$ , 400 MHz):  $\delta = 7.88$  (d,  $J = 7.2$  Hz, 2H), 7.41-7.29 (m, 6H), 7.16 (d,  $J = 7.2$  Hz, 2H), 7.08-7.00 (m, 2H), 6.81 (d,  $J = 7.2$  Hz, 1H), 5.15 (dd,  $J = 10.0, 3.6$  Hz, 1H), 3.74 (brs, 1H), 3.24 (dd,  $J = 13.4, 3.8$  Hz, 1H), 3.05 (dd,  $J = 13.4, 9.8$  Hz, 1H), 2.34 (s, 3H).  $^{13}\text{C}$  NMR ( $\text{CDCl}_3$ , 100 MHz):  $\delta = 166.7, 141.6, 138.6, 138.5, 137.7, 137.3, 129.6, 129.0, 128.4, 127.9, 126.5, 125.9, 125.3, 120.7, 120.1, 69.7, 37.4, 20.6$ . ESI-MS:  $m/z$  313  $[\text{M}+\text{H}]^+$ . Anal. Calcd. for  $\text{C}_{22}\text{H}_{20}\text{N}_2$ : C, 84.58; H, 6.45; N, 8.97. Found : C, 84.52; H, 6.59; N, 8.71.

5. 2-(4-methoxyphenyl)-4-phenyl-2,3-dihydro-1*H*-benzo[*b*][1,4]diazepine

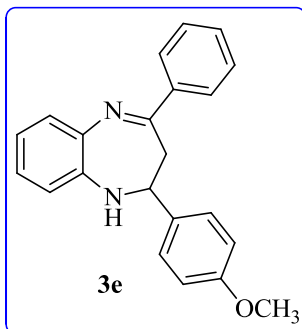

Light yellow solid. mp = 65-67 °C. IR (KBr): 3450, 1639, 1608, 1474, 1031  $\text{cm}^{-1}$ .  $^1\text{H}$  NMR ( $\text{CDCl}_3$ , 400 MHz):  $\delta$  = 7.87 (d,  $J$  = 6.0 Hz, 2H), 7.41-7.33 (m, 6H), 7.08-7.01 (m, 2H), 6.88 (d,  $J$  = 8.8 Hz, 2H), 6.81 (d,  $J$  = 7.2 Hz, 1H), 5.15 (dd,  $J$  = 10.0, 3.6 Hz, 1H), 3.80 (s, 4H, NH +  $\text{OCH}_3$ ), 3.24 (dd,  $J$  = 13.6, 3.6 Hz, 1H), 3.04 (dd,  $J$  = 13.4, 9.8 Hz, 1H).  $^{13}\text{C}$  NMR ( $\text{CDCl}_3$ , 100 MHz):  $\delta$  = 167.2, 159.3, 139.14, 139.12, 138.2, 137.3, 130.1, 128.9, 128.4, 127.08, 127.03, 126.4, 121.2, 120.6, 114.1, 70.0, 55.3, 37.9. ESI-MS:  $m/z$  329  $[\text{M}+\text{H}]^+$ . Anal. Calcd. for  $\text{C}_{22}\text{H}_{20}\text{N}_2\text{O}$ : C, 80.46; H, 6.14; N, 8.53. Found: C, 80.59; H, 6.30; N, 8.32.

6. 4-(4-phenyl-2,3-dihydro-1H-benzo[*b*][1,4]diazepin-2-yl)benzonitrile

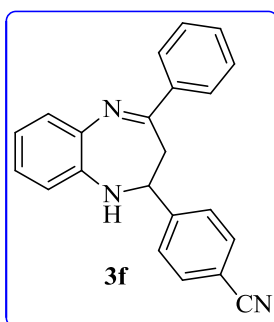

Light yellow solid. mp = 183-185 °C. IR (KBr): 3375, 3057, 2222, 1612, 1571, 1472  $\text{cm}^{-1}$ .  $^1\text{H}$  NMR ( $\text{CDCl}_3$ , 400 MHz):  $\delta$  = 7.71 (d,  $J$  = 7.2 Hz, 2H), 7.58-7.54 (m, 4H), 7.39-7.33 (m, 4H), 7.08 (s, 2H), 6.85 (d,  $J$  = 6.0 Hz, 1H), 5.36 (brs, 1H), 3.74 (s, 1H), 3.22

(dd,  $J = 13.0, 3.0$  Hz, 1H), 3.09 (dd,  $J = 13.4, 7.4$  Hz, 1H).  $^{13}\text{C}$  NMR ( $\text{CDCl}_3$ , 100 MHz):  $\delta = 166.9, 149.6, 139.7, 138.7, 137.7, 132.5, 130.4, 128.8, 128.4, 126.9, 126.8, 126.6, 122.0, 120.7, 118.6, 111.6, 70.7, 36.6$ . ESI-MS:  $m/z$  324  $[\text{M}+\text{H}]^+$ . Anal. Calcd. for  $\text{C}_{22}\text{H}_{17}\text{N}_3$ : C, 81.71; H, 5.30; N, 12.99. Found : C, 81.42; H, 5.25; N, 13.13.

7. 4-(4-chlorophenyl)-2-phenyl-2,3-dihydro-1*H*-benzo[*b*][1,4]diazepine

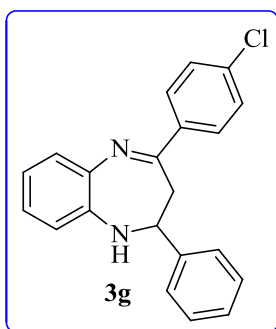

Yellow solid. mp = 129-130 °C. IR (KBr): 3347, 3060, 1607, 1587, 1473  $\text{cm}^{-1}$ .  $^1\text{H}$  NMR ( $\text{CDCl}_3$ , 400 MHz):  $\delta = 7.74$  (d,  $J = 8.4$  Hz, 2H), 7.43-7.29 (m, 8H), 7.09-7.01 (m, 2H), 6.83 (d,  $J = 7.6$  Hz, 1H), 5.21 (dd,  $J = 8.8, 3.6$  Hz, 1H), 3.78 (s, 1H), 3.21 (dd,  $J = 13.4, 3.8$  Hz, 1H), 3.05 (dd,  $J = 14.2, 7.8$  Hz, 1H).  $^{13}\text{C}$  NMR ( $\text{CDCl}_3$ , 100 MHz):  $\delta = 166.0, 144.6, 138.9, 138.3, 137.5, 136.2, 129.0, 128.9, 128.5, 128.3, 128.1, 126.7, 125.9, 121.4, 120.6, 70.6, 37.7$ . ESI-MS:  $m/z$  333, 335  $[\text{M}+\text{H}]^+$ . Anal. Calcd. for  $\text{C}_{21}\text{H}_{17}\text{ClN}_2$ : C, 75.78; H, 5.15; N, 8.42. Found : C, 75.71; H, 5.27; N, 8.52.

8. 7,8-dimethyl-2,4-diphenyl-2,3-dihydro-1*H*-benzo[*b*][1,4]diazepine

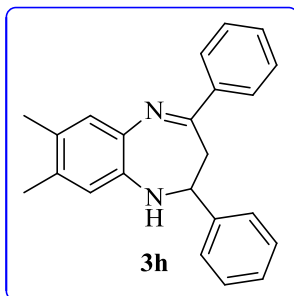

Yellow solid. mp = 125-127 °C. IR (KBr): 3353, 1615, 1566, 1452  $\text{cm}^{-1}$ .  $^1\text{H}$  NMR ( $\text{CDCl}_3$ , 400 MHz):  $\delta$  = 7.83 (d,  $J$  = 4.8 Hz, 2H), 7.43-7.29 (m, 8H), 7.15 (s, 1H), 6.62 (s, 1H), 5.15 (dd,  $J$  = 9.4, 3.0 Hz, 1H), 3.66 (s, 1H), 3.24 (dd,  $J$  = 13.6, 3.6 Hz, 1H), 3.05 (dd,  $J$  = 13.4, 9.8 Hz, 1H), 2.24 (s, 6H).  $^{13}\text{C}$  NMR ( $\text{CDCl}_3$ , 100 MHz):  $\delta$  = 166.4, 145.1, 139.4, 136.8, 136.1, 135.0, 130.0, 129.9, 129.3, 128.8, 128.3, 127.9, 126.9, 125.9, 121.5, 70.2, 38.0, 19.4, 18.8. ESI-MS:  $m/z$  327  $[\text{M}+\text{H}]^+$ . Anal. Calcd. for  $\text{C}_{23}\text{H}_{22}\text{N}_2$ : C, 84.63; H, 6.79; N, 8.58. Found : C, 84.86; H, 6.82; N, 8.40.

9. 2-(4-bromophenyl)-7,8-dimethyl-4-phenyl-2,3-dihydro-1H-benzo[*b*][1,4]diazepine

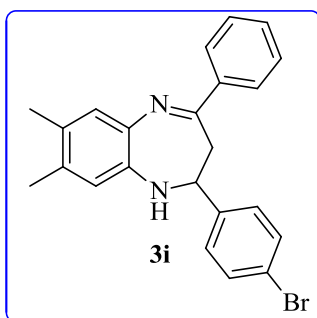

Yellow solid. mp = 153-155 °C. IR (KBr): 3355, 3053, 1608, 1571, 1477  $\text{cm}^{-1}$ .  $^1\text{H}$  NMR ( $\text{CDCl}_3$ , 400 MHz):  $\delta$  = 7.79 (d,  $J$  = 6.4 Hz, 2H), 7.45-7.29 (m, 7H), 7.14 (s, 1H), 6.60 (s, 1H), 5.15 (dd,  $J$  = 8.8, 3.6 Hz, 1H), 3.59 (s, 1H), 3.19 (dd,  $J$  = 13.4, 3.8 Hz, 1H), 3.02 (dd,  $J$  = 13.4, 8.6 Hz, 1H), 2.25 (s, 3H), 2.24 (s, 3H).  $^{13}\text{C}$  NMR ( $\text{CDCl}_3$ , 100 MHz):  $\delta$  = 165.8, 143.4, 138.6, 136.6, 135.2, 134.6, 131.3, 129.5, 129.3, 129.2, 127.8, 127.2, 126.3,

121.1, 69.4, 37.0, 18.9, 18.3. ESI-MS:  $m/z$  405, 407  $[M+H]^+$ . Anal. Calcd. for  $C_{23}H_{21}BrN_2$ : C, 68.15; H, 5.22; N, 6.91. Found : C, 68.03; H, 5.15; N, 7.18.

10. 7,8-dimethyl-4-phenyl-2-(p-tolyl)-2,3-dihydro-1*H*-benzo[*b*][1,4]diazepine

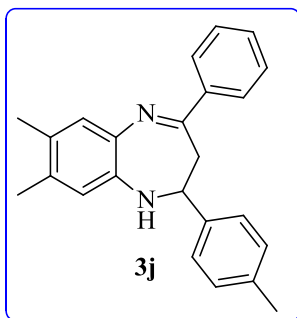

Brown gummy solid. IR (KBr): 3346, 1597, 1563, 1480  $cm^{-1}$ .  $^1H$  NMR ( $CDCl_3$ , 400 MHz):  $\delta$  = 7.86-7.84 (m, 2H), 7.39 (d,  $J$  = 4.8 Hz, 3H), 7.31 (d,  $J$  = 8.8 Hz, 2H), 7.16 (d,  $J$  = 7.2 Hz, 3H), 6.59 (s, 1H), 5.09 (dd,  $J$  = 9.4, 3.0 Hz, 1H), 3.63 (s, 1H), 3.22 (dd,  $J$  = 14.2, 3.0 Hz, 1H), 3.03 (dd,  $J$  = 13.4, 9.8 Hz, 1H), 2.34 (s, 3H), 2.24 (s, 3H), 2.23 (s, 3H).  $^{13}C$  NMR ( $CDCl_3$ , 100 MHz):  $\delta$  = 166.8, 147.8, 137.7, 135.8, 134.8, 130.0, 129.6, 129.4, 128.3, 128.2, 127.9, 127.0, 126.97, 126.92, 125.8, 125.4, 122.3, 121.4, 73.1, 43.3, 29.8, 19.3, 18.8. ESI-MS:  $m/z$  341  $[M+H]^+$ . Anal. Calcd. for  $C_{24}H_{24}N_2$ : C, 84.67; H, 7.11; N, 8.23. Found : C, 84.46; H, 7.17; N, 8.04.

11. 4-(4-chlorophenyl)-7,8-dimethyl-2-phenyl-2,3-dihydro-1*H*-benzo[*b*][1,4]diazepine

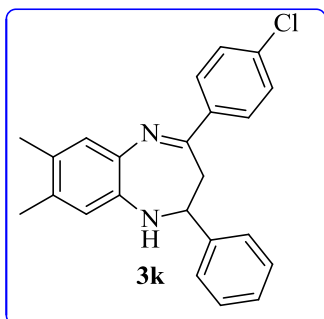

Yellow solid. mp = 118-120 °C. IR (KBr): 3354, 3048, 1619, 1598, 1475 cm<sup>-1</sup>. <sup>1</sup>H NMR (CDCl<sub>3</sub>, 400 MHz): δ = 7.73 (d, *J* = 8.8 Hz, 2H), 7.42 (d, *J* = 7.6 Hz, 2H), 7.35-7.29 (m, 5H), 7.13 (s, 1H), 6.61 (s, 1H), 5.14 (dd, *J* = 8.2, 3.0 Hz, 1H), 3.67 (s, 1H), 3.18 (dd, *J* = 13.6, 3.6 Hz, 1H), 3.03 (dd, *J* = 14.6, 8.6 Hz, 1H), 2.24 (s, 3H), 2.23 (s, 3H). <sup>13</sup>C NMR (CDCl<sub>3</sub>, 100 MHz): δ = 165.1, 144.8, 137.8, 136.5, 136.2, 135.9, 135.3, 130.0, 129.4, 128.8, 128.4, 128.2, 128.0, 125.9, 121.5, 70.2, 37.9, 19.4, 18.8. ESI-MS: *m/z* 361, 363 [M+H]<sup>+</sup>. Anal. Calcd. for C<sub>23</sub>H<sub>21</sub>ClN<sub>2</sub>: C, 76.55; H, 5.87; N, 7.76. Found : C, 76.59; H, 6.00; N, 7.51.

12. 2-(furan-2-yl)-7,8-dimethyl-4-phenyl-2,3-dihydro-1*H*-benzo[*b*][1,4]diazepine

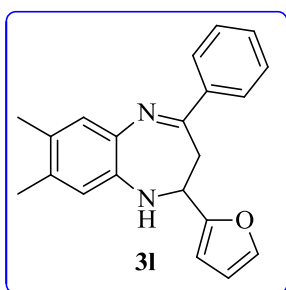

Yellow orange solid. mp = 68-70 °C. IR (KBr): 3356, 1592, 1556, 1474, 1002 cm<sup>-1</sup>. <sup>1</sup>H NMR (CDCl<sub>3</sub>, 400 MHz): δ = 7.38-7.25 (m, 4H), 7.06-6.98 (m, 2H), 6.79 (s, 1H), 6.61 (s, 1H), 6.30 (s, 1H), 6.24 (s, 1H), 5.25 (d, *J* = 3.6 Hz, 1H), 3.70 (bs, 1H), 3.31 (d, *J* = 11.6 Hz, 1H), 3.13-3.08 (m, 1H), 2.23 (s, 6H). <sup>13</sup>C NMR (CDCl<sub>3</sub>, 100 MHz): δ = 170.5, 162.5, 156.0, 141.9, 136.0, 135.7, 134.0, 132.7, 130.6, 128.5, 127.9, 122.3, 119.2, 118.3, 117.9, 110.3, 105.6, 63.5, 33.1, 19.4, 18.8. ESI-MS: *m/z* 317 [M+H]<sup>+</sup>. Anal. Calcd. for C<sub>21</sub>H<sub>20</sub>N<sub>2</sub>O: C, 79.72; H, 6.37; N, 8.85. Found : C, 80.00.; H, 6.27; N, 8.70.

13. 2-(2-(4-chlorophenyl)-2,3-dihydro-1*H*-benzo[*b*][1,4]diazepin-4-yl)phenol

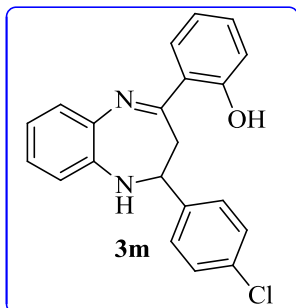

Yellow solid. mp = 146-148 °C. IR (KBr): 3353, 1609, 1594, 1470  $\text{cm}^{-1}$ .  $^1\text{H}$  NMR ( $\text{CDCl}_3$ , 400 MHz):  $\delta$  = 15.26 (s, 1H), 7.35 (d,  $J$  = 6.8 Hz, 2H), 7.30 (d,  $J$  = 6.4 Hz, 4H), 7.17 (d,  $J$  = 6.4 Hz, 1H), 7.13 (t,  $J$  = 5.8 Hz, 1H), 7.05 (t,  $J$  = 6.0 Hz, 1H), 7.00 (d,  $J$  = 6.4 Hz, 1H), 6.84 (d,  $J$  = 6.4 Hz, 1H), 6.72 (t,  $J$  = 6.0 Hz, 1H), 5.21 (dd,  $J$  = 6.4, 3.2 Hz, 1H), 3.80 (s, 1H), 3.27 (dd,  $J$  = 10.8, 3.2 Hz, 1H), 3.04 (dd,  $J$  = 11.2, 6.4 Hz, 1H).  $^{13}\text{C}$  NMR ( $\text{CDCl}_3$ , 100 MHz):  $\delta$  = 171.1, 142.5, 138.8, 133.9, 133.1, 131.1, 129.1, 128.2, 128.1, 127.5, 127.3, 121.9, 120.8, 118.9, 118.5, 118.0, 69.7, 36.1. ESI-MS:  $m/z$  349, 351  $[\text{M}+\text{H}]^+$ . Anal. Calcd. for  $\text{C}_{21}\text{H}_{17}\text{ClN}_2\text{O}$ : C, 72.31; H, 4.91; N, 8.03. Found : C, 72.20; H, 4.65; N, 8.21.

14. 4-(4-(2-hydroxyphenyl)-2,3-dihydro-1H-benzo[*b*][1,4]diazepin-2-yl)benzoyl nitrile

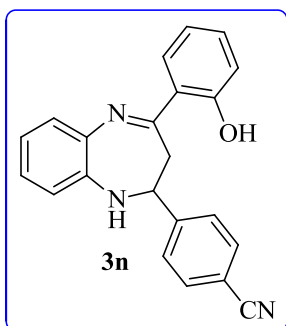

Yellow solid. mp = 209-211 °C. IR (KBr): 3371, 2222, 1610, 1563, 1479  $\text{cm}^{-1}$ .  $^1\text{H}$  NMR ( $\text{CDCl}_3$ , 400 MHz):  $\delta$  = 15.01 (s, 1H), 7.62 (d,  $J$  = 8.4 Hz, 2H), 7.58 (d,  $J$  = 8.0 Hz, 2H), 7.30 (d,  $J$  = 7.6 Hz, 2H), 7.17 (t,  $J$  = 6.8 Hz, 1H), 7.10 (t,  $J$  = 7.0 Hz, 1H), 7.01 (t,  $J$  = 8.6

Hz, 2H), 6.89 (d,  $J = 8.0$  Hz, 1H), 6.68 (t,  $J = 7.6$  Hz, 1H), 5.39 (s, 1H), 3.79 (s, 1H), 3.28 (dd,  $J = 13.6, 4.0$  Hz, 1H), 3.13 (dd,  $J = 13.6, 7.2$  Hz, 1H).  $^{13}\text{C}$  NMR ( $\text{CDCl}_3$ , 100 MHz):  $\delta = 171.2, 161.9, 150.4, 141.2, 133.6, 133.1, 132.7, 129.2, 128.8, 128.0, 127.7, 120.8, 120.2, 119.4, 118.3, 117.8, 110.3, 67.6, 36.0$ . ESI-MS:  $m/z$  340  $[\text{M}+\text{H}]^+$ . Anal. Calcd. for  $\text{C}_{22}\text{H}_{17}\text{N}_3\text{O}$ : C, 77.86; H, 5.05; N, 12.38. Found : C, 77.84; H, 4.88; N, 12.53.

15. 2-(2-(4-bromophenyl)-7,8-dimethyl-2,3-dihydro-1*H*-benzo[*b*][1,4]diazepin-4-yl)phenol

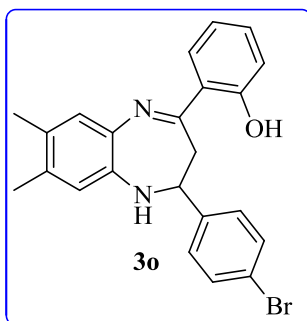

Yellow brown solid. mp = 168-170 °C. IR (KBr): 3346, 1588, 1545, 1488  $\text{cm}^{-1}$ .  $^1\text{H}$  NMR ( $\text{CDCl}_3$ , 400 MHz):  $\delta = 15.48$  (s, 1H), 7.48 (d,  $J = 6.8$  Hz, 2H), 7.36 (d,  $J = 6.8$  Hz, 3H), 7.27 (t,  $J = 6.2$  Hz, 1H), 6.94 (s, 1H), 6.82-6.81 (m, 2H), 6.71 (t,  $J = 6.0$  Hz, 1H), 5.94 (s, 1H), 5.21 (s, 1H), 3.28 (dd,  $J = 11.2, 5.6$  Hz, 1H), 3.10 (dd,  $J = 11.0, 2.6$  Hz, 1H), 2.176 (s, 3H), 2.175 (s, 3H).  $^{13}\text{C}$  NMR ( $\text{CDCl}_3$ , 100 MHz):  $\delta = 170.4, 162.0, 144.5, 138.9, 136.2, 132.8, 131.5, 131.3, 129.2, 129.1, 128.8, 127.8, 121.6, 120.6, 119.6, 118.2, 117.8, 67.1, 39.4, 19.6, 18.7$ . ESI-MS:  $m/z$  421, 423  $[\text{M}+\text{H}]^+$ . Anal. Calcd. for  $\text{C}_{23}\text{H}_{21}\text{BrN}_2\text{O}$ : C, 65.57; H, 5.02; N, 6.65. Found : C, 65.41; H, 5.28; N, 6.73.

16. 2-(7,8-dimethyl-2-(*p*-tolyl)-2,3-dihydro-1*H*-benzo[*b*][1,4]diazepin-4-yl)phenol



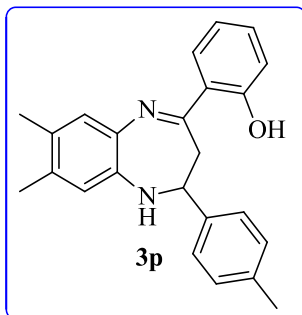

Yellow solid. mp = 192-194 °C. IR (KBr): 3450, 1619, 1473  $\text{cm}^{-1}$ .  $^1\text{H}$  NMR ( $\text{CDCl}_3$ , 400 MHz):  $\delta$  = 15.56 (s, 1H), 7.41 (d,  $J$  = 6.0 Hz, 1H), 7.28-7.26 (m, 3H), 7.11 (d,  $J$  = 6.4 Hz, 2H), 6.93 (s, 1H), 6.83-6.82 (m, 2H), 6.73 (t,  $J$  = 5.8 Hz, 1H), 5.85 (dd,  $J$  = 1.2 Hz, 1H), 5.13 (t,  $J$  = 2.8 Hz, 1H), 3.19 (d,  $J$  = 11.0, 5.8 Hz, 1H), 3.13 (dd,  $J$  = 11.2, 2.8 Hz, 1H), 2.24 (s, 3H), 2.17 (s, 6H).  $^{13}\text{C}$  NMR ( $\text{CDCl}_3$ , 100 MHz):  $\delta$  = 170.4, 162.1, 142.3, 139.1, 136.7, 136.2, 132.7, 131.2, 129.29, 129.25, 129.0, 127.6, 126.4, 121.7, 119.6, 118.3, 117.8, 67.4, 37.1, 21.1, 19.6, 18.7. ESI-MS:  $m/z$  357  $[\text{M}+\text{H}]^+$ . Anal. Calcd. for  $\text{C}_{24}\text{H}_{24}\text{N}_2\text{O}$ : C, 80.87; H, 6.79; N, 7.86. Found : C, 80.84; H, 6.93; N, 8.09.

17. 2-(2-(4-methoxyphenyl)-7,8-dimethyl-2,3-dihydro-1H-benzo[*b*][1,4]diazepin-4-yl)phenol

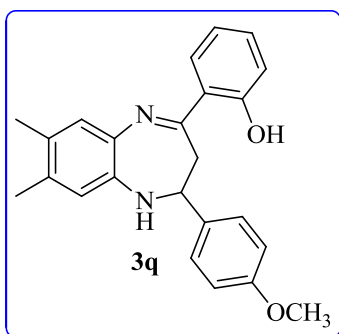

Yellow solid. mp = 160-161 °C. IR (KBr): 3378, 1619, 1591, 1471, 1112  $\text{cm}^{-1}$ .  $^1\text{H}$  NMR ( $\text{CDCl}_3$ , 400 MHz):  $\delta$  = 15.58 (s, 1H), 7.40 (d,  $J$  = 6.4 Hz, 1H), 7.33 (d,  $J$  = 6.8 Hz, 2H), 7.29 (t,  $J$  = 5.8 Hz, 1H), 6.95 (s, 1H), 6.87 (t,  $J$  = 6.6 Hz, 4H), 6.74 (t,  $J$  = 6.0 Hz, 1H),

5.81 (s, 1H), 5.13 (s, 1H), 3.71 (s, 3H), 3.17-3.10 (m, 2H), 2.18 (s, 6H).  $^{13}\text{C}$  NMR ( $\text{CDCl}_3$ , 100 MHz):  $\delta = 170.5, 162.2, 158.9, 139.1, 137.4, 136.1, 132.7, 131.3, 129.1, 129.0, 127.7, 127.6, 121.7, 119.6, 118.3, 117.8, 114.1, 67.4, 55.5, 37.2, 19.6, 18.7$ . ESI-MS:  $m/z$  373  $[\text{M}+\text{H}]^+$ . Anal. Calcd. for  $\text{C}_{24}\text{H}_{24}\text{N}_2\text{O}_2$ : C, 77.39; H, 6.49; N, 7.52. Found : C, 77.58; H, 6.47; N, 7.58.

18. 4-(4-chlorophenyl)-2-phenyl-4,5-dihydro-3H-pyrido[2,3-*b*][1,4]diazepine

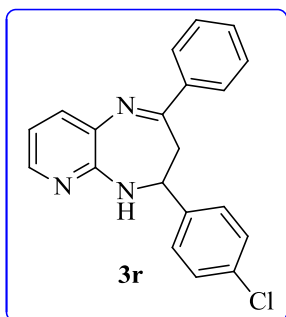

Yellow orange solid. mp = 165-166 °C. IR (KBr): 3230, 3057, 1608, 1579, 1445  $\text{cm}^{-1}$ .  $^1\text{H}$  NMR ( $\text{CDCl}_3$ , 400 MHz):  $\delta = 8.04$  (s, 1H), 7.69 (d,  $J = 7.2$  Hz, 3H), 7.38-7.30 (m, 7H), 6.91 (s, 1H), 5.26 (s, 1H), 5.18 (d,  $J = 6.0$  Hz, 1H), 3.32 (d,  $J = 14.4$  Hz, 1H), 3.14-3.08 (m, 1H).  $^{13}\text{C}$  NMR ( $\text{CDCl}_3$ , 100 MHz):  $\delta = 164.4, 149.8, 144.8, 142.6, 137.6, 136.6, 135.4, 129.6, 127.9, 127.5, 127.2, 127.1, 124.9, 114.7, 64.7, 38.2$ . ESI-MS:  $m/z$  334, 336  $[\text{M}+\text{H}]^+$ . Anal. Calcd. for  $\text{C}_{20}\text{H}_{16}\text{ClN}_3$ : C, 71.96; H, 4.83; N, 12.59. Found : C, 71.84; 4.99; N, 12.54.

19. 4-(4-bromophenyl)-2-phenyl-4,5-dihydro-3H-pyrido[2,3-*b*][1,4]diazepine

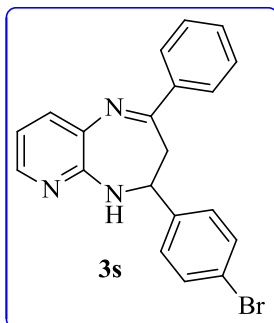

Brown yellow gummy solid. IR (KBr): 3450, 2925, 1638, 1445  $\text{cm}^{-1}$ .  $^1\text{H}$  NMR ( $\text{CDCl}_3$ , 400 MHz):  $\delta$  = 8.04 (d,  $J$  = 4.8 Hz, 1H), 7.76 (d,  $J$  = 7.2 Hz, 2H), 7.67 (d,  $J$  = 7.6 Hz, 1H), 7.46 (d,  $J$  = 7.2 Hz, 2H), 7.41-7.35 (m, 2H), 7.30 (d,  $J$  = 8.8 Hz, 3H), 6.94-6.92 (m, 1H), 5.18 (d,  $J$  = 10.4 Hz, 1H), 5.08 (s, 1H), 3.33 (dd,  $J$  = 12.0, 2.4 Hz, 1H), 3.12 (dd,  $J$  = 13.6, 8.4 Hz, 1H).  $^{13}\text{C}$  NMR ( $\text{CDCl}_3$ , 100 MHz):  $\delta$  = 166.9, 151.1, 145.8, 141.0, 139.3, 138.9, 137.9, 131.1, 130.4, 129.7, 128.5, 127.1, 126.0, 115.7, 65.4, 39.8. ESI-MS:  $m/z$  378, 380  $[\text{M}+\text{H}]^+$ . Anal. Calcd. for  $\text{C}_{20}\text{H}_{16}\text{BrN}_3$ : C, 63.50; H, 4.26; N, 11.11. Found : C, 63.41; H, 4.33; N, 11.32.

20. 2-phenyl-4-(p-tolyl)-4,5-dihydro-3H-pyrido[2,3-*b*][1,4]diazepine

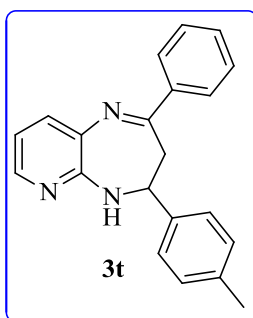

Yellow brown solid. mp = 158-159  $^{\circ}\text{C}$ . IR (KBr): 3357, 1593, 1557, 1474  $\text{cm}^{-1}$ .  $^1\text{H}$  NMR ( $\text{CDCl}_3$ , 400 MHz):  $\delta$  = 8.04 (dd,  $J$  = 5.0, 1.4 Hz, 1H), 7.82 (d,  $J$  = 6.8 Hz, 2H), 7.67 (dd,  $J$  = 7.4, 1.4 Hz, 1H), 7.42-7.36 (m, 3H), 7.30 (d,  $J$  = 7.6 Hz, 2H), 7.16 (d,  $J$  = 8.4 Hz,

2H), 6.90 (dd,  $J = 7.8, 5.0$  Hz, 1H), 5.14 (brs, 1H), 5.09 (d,  $J = 8.8$  Hz, 1H), 3.38 (d,  $J = 14.0$  Hz, 1H), 3.08 (dd,  $J = 14.0, 8.8$  Hz, 1H), 2.33 (s, 3H).  $^{13}\text{C}$  NMR ( $\text{CDCl}_3$ , 100 MHz):  $\delta = 166.9, 147.8, 135.8, 134.9, 129.7, 129.6, 129.5, 128.6, 128.5, 128.3, 128.2, 128.0, 127.0, 125.8, 125.4, 122.3, 73.2, 43.3, 19.4$ . ESI-MS:  $m/z$  314  $[\text{M}+\text{H}]^+$ . Anal. Calcd. for  $\text{C}_{21}\text{H}_{19}\text{N}_3$ : C, 80.48; H, 6.11; N, 13.41. Found : C, 80.41; H, 6.24; N, 13.23.

21. 2-(4-chlorophenyl)-4-phenyl-4,5-dihydro-3H-pyrido[2,3-*b*][1,4]diazepine

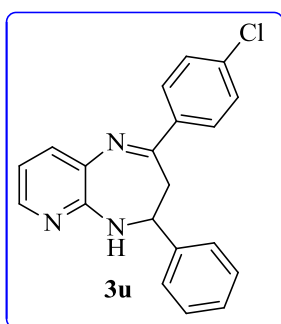

Yellow orange solid. mp = 172-174 °C. IR (KBr): 3294, 3064, 1603, 1573, 1446  $\text{cm}^{-1}$ .  $^1\text{H}$  NMR ( $\text{CDCl}_3$ , 400 MHz):  $\delta = 8.05$  (d,  $J = 3.6$  Hz, 1H), 7.69-7.64 (m, 3H), 7.41-7.28 (m, 7H), 6.92-6.89 (m, 1H), 5.17 (s, 1H), 5.15 (d,  $J = 8.8$  Hz, 1H), 3.32 (d,  $J = 13.2$  Hz, 1H), 3.12 (dd,  $J = 14.2, 7.8$  Hz, 1H).  $^{13}\text{C}$  NMR ( $\text{CDCl}_3$ , 100 MHz):  $\delta = 165.4, 151.0, 146.2, 143.7, 138.4, 137.6, 136.4, 130.5, 128.9, 128.5, 128.3, 128.1, 126.0, 115.8, 65.9, 39.3$ . ESI-MS:  $m/z$  334, 336  $[\text{M}+\text{H}]^+$ . Anal. Calcd. for  $\text{C}_{20}\text{H}_{16}\text{ClN}_3$ : C, 71.96; H, 4.83; N, 12.59. Found : C, 72.08; H, 4.81; N, 12.35.

22. 2,4-diphenyl-4,5-dihydro-3H-pyrido[2,3-*b*][1,4]diazepine

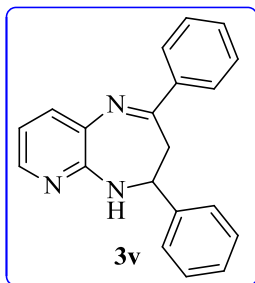

Yellow solid. mp = 148-151 °C. IR (KBr): 3237, 3060, 1610, 1445  $\text{cm}^{-1}$ .  $^1\text{H}$  NMR ( $\text{CDCl}_3$ , 400 MHz):  $\delta$  = 8.03-8.02 (m, 1H), 7.79 (d,  $J$  = 6.4 Hz, 2H), 7.67 (dd,  $J$  = 8.0, 1.2 Hz, 1H), 7.42-7.28 (m, 8H), 6.91 (dd,  $J$  = 7.4, 5.0 Hz, 1H), 5.17 (d,  $J$  = 2.4 Hz, 1H), 5.15 (s, 1H), 3.38-3.35 (m, 1H), 3.12 (dd,  $J$  = 13.8, 8.6 Hz, 1H).  $^{13}\text{C}$  NMR ( $\text{CDCl}_3$ , 100 MHz):  $\delta$  = 166.2, 150.4, 145.5, 143.5, 138.7, 137.7, 130.3, 129.7, 128.4, 127.9, 127.6, 126.4, 125.5, 115.3, 65.6, 38.9. ESI-MS:  $m/z$  300  $[\text{M}+\text{H}]^+$ . Anal. Calcd. for  $\text{C}_{20}\text{H}_{17}\text{N}_3$ : C, 80.24; H, 5.72; N, 14.04. Found : C, 80.07; H, 5.96; N, 14.12.

23. 2,4-bis(4-bromophenyl)-2-methyl-2,3-dihydro-1H-benzo[*b*][1,4]diazepine

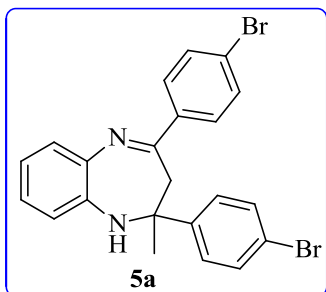

Pale brown solid. mp = 145-146 °C. IR (KBr): 3334, 1608, 1469  $\text{cm}^{-1}$ .  $^1\text{H}$  NMR ( $\text{CDCl}_3$ , 400 MHz):  $\delta$  = 7.48 (d,  $J$  = 8.8 Hz, 2H), 7.42-7.35 (m, 6H), 7.31 (dd,  $J$  = 7.6, 2.0 Hz, 1H), 7.10-7.04 (m, 2 H), 6.85 (dd,  $J$  = 7.6, 1.6 Hz, 1H), 3.43 (s, 1H), 3.08 (d,  $J$  = 13.2 Hz, 1H), 2.90 (d,  $J$  = 13.2 Hz, 1H), 1.74 (s, 3H).  $^{13}\text{C}$  NMR ( $\text{CDCl}_3$ , 100 MHz):  $\delta$  = 168.3, 148.5, 142.0, 140.3, 139.8, 133.5, 133.4, 130.8, 130.7, 129.6, 128.8, 126.8, 124.2, 123.7,

123.4, 75.7, 45.0, 31.9. ESI-MS:  $m/z$  469, 471  $[M + H]^+$ . Anal. Calcd for  $C_{22}H_{18}Br_2N_2$ : C, 56.20; H, 3.86; N, 5.96. Found: C, 56.32; H, 3.91; N, 5.75.

24. 2-methyl-2,4-di-p-tolyl-2,3-dihydro-1*H*-benzo[*b*][1,4]diazepine

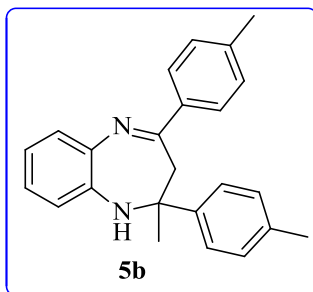

Yellow solid. mp = 100-102 °C. IR (KBr): 3319, 1600, 1441  $cm^{-1}$ .  $^1H$  NMR ( $CDCl_3$ , 400 MHz):  $\delta$  = 7.56 (d,  $J$  = 8.0 Hz, 2H), 7.49 (d,  $J$  = 8.0 Hz, 2H), 7.32-7.29 (m, 1H), 7.09-7.02 (m, 6H), 6.82 (dd,  $J$  = 7.2, 2.0 Hz, 1H), 3.51 (s, 1H), 3.08 (d,  $J$  = 13.2 Hz, 1H), 2.98 (d,  $J$  = 13.2 Hz, 1H), 2.33 (s, 3H), 2.29 (s, 3H), 1.72 (s, 3H).  $^{13}C$  NMR ( $CDCl_3$ , 100 MHz):  $\delta$  = 169.8, 147.2, 142.5, 142.2, 140.4, 139.2, 138.9, 131.2, 131.0, 130.7, 129.3, 128.3, 127.4, 123.8, 123.6, 75.6, 45.0, 32.1, 23.5, 23.1. ESI- MS:  $m/z$  341  $[M + H]^+$ . Anal. Calcd for  $C_{24}H_{24}N_2$ : C, 84.67; H, 7.11; N, 8.23. Found: C, 84.50; H, 6.83; N, 8.41.

25. 2,4-bis(4-methoxyphenyl)-2-methyl-2,3-dihydro-1*H*-benzo[*b*][1,4]diazepine

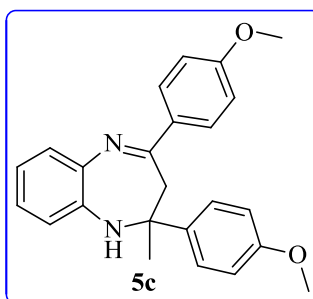

Brown solid. mp = 115-117 °C. IR (KBr): 3322, 1606, 1467, 1030  $\text{cm}^{-1}$ .  $^1\text{H}$  NMR ( $\text{CDCl}_3$ , 400 MHz):  $\delta$  = 7.62 (d,  $J$  = 9.2 Hz, 2H), 7.56 (d,  $J$  = 9.2 Hz, 2H), 7.32-7.29 (m, 1H), 7.07-7.05 (m, 2H), 6.84-6.77 (m, 5H), 3.81 (s, 3H), 3.77 (s, 3H), 3.44 (brs, 1H), 3.07 (d,  $J$  = 12.8 Hz, 1H), 2.94 (d,  $J$  = 12.8 Hz, 1H), 1.74 (s, 3H).  $^{13}\text{C}$  NMR ( $\text{CDCl}_3$ , 100 MHz):  $\delta$  = 169.3, 163.2, 160.7, 142.9, 142.3, 140.2, 134.5, 131.0, 130.4, 128.8, 128.1, 124.0, 123.7, 115.7, 115.5, 75.6, 57.5, 45.0, 31.9. ESI- MS:  $m/z$  373  $[\text{M} + \text{H}]^+$ . Anal. Calcd for  $\text{C}_{24}\text{H}_{24}\text{N}_2\text{O}_2$ : C, 77.39; H, 6.49; N, 7.52. Found: C, 77.52; H, 6.43; N, 7.71.

26. 2,4-bis(4-chlorophenyl)-2,7,8-trimethyl-2,3-dihydro-1H-benzo[*b*][1,4]diazepine

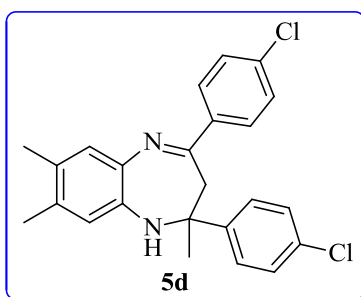

Yellow solid. mp = 162-164 °C. IR (KBr): 3281, 1615, 1473  $\text{cm}^{-1}$ .  $^1\text{H}$  NMR ( $\text{CDCl}_3$ , 400 MHz):  $\delta$  = 7.54 (d,  $J$  = 8.4 Hz, 2H), 7.48 (d,  $J$  = 9.2 Hz, 2H), 7.27 (s, 1H), 7.22 (d,  $J$  = 8.4 Hz, 3H), 7.10 (s, 1H), 6.64 (s, 1H), 3.35 (brs, 1H), 3.08 (d,  $J$  = 12.8 Hz, 1H), 2.89 (d,  $J$  = 13.6 Hz, 1H), 2.26 (s, 3H), 2.25 (s, 3H), 1.73 (s, 3H).  $^{13}\text{C}$  NMR ( $\text{CDCl}_3$ , 100 MHz):  $\delta$  = 167.4, 148.2, 140.2, 139.7, 137.9, 137.5, 137.4, 135.1, 132.2, 131.8, 130.5, 130.4, 130.3, 129.2, 124.5, 75.2, 45.3, 31.9, 21.6, 21.0. ESI-MS:  $m/z$  409, 411  $[\text{M} + \text{H}]^+$ . Anal. Calcd for  $\text{C}_{24}\text{H}_{22}\text{Cl}_2\text{N}_2$ : C, 70.42; H, 5.42; N, 6.84. Found: C, 70.28; H, 5.64; N, 6.77.

27. 2,4-bis(4-bromophenyl)-2,7,8-trimethyl-2,3-dihydro-1H-benzo[*b*][1,4]diazepine

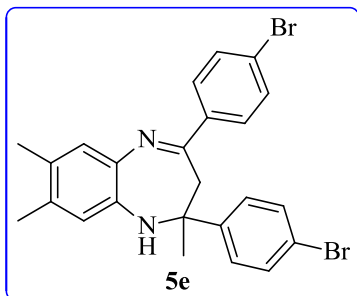

Yellow solid. mp = 123-125 °C. IR (KBr): 3286, 1617, 1445  $\text{cm}^{-1}$ .  $^1\text{H}$  NMR ( $\text{CDCl}_3$ , 400 MHz):  $\delta$  = 7.51 (d,  $J$  = 7.6 Hz, 2H), 7.48 (d,  $J$  = 6.8 Hz, 2H) 7.15-7.08 (m, 4H), 7.03 (s, 1H), 6.55 (s, 1H), 3.33 (s, 1H), 3.04 (d,  $J$  = 13.2 Hz, 1H), 2.88 (d,  $J$  = 13.2 Hz, 1H), 2.15 (s, 6H), 1.65 (s, 3H).  $^{13}\text{C}$  NMR ( $\text{CDCl}_3$ , 100 MHz):  $\delta$  = 166.3, 147.3, 139.3, 137.2, 135.3, 134.3, 129.17, 129.13, 128.9, 127.7, 127.4, 126.4, 124.9, 121.8, 72.7, 42.7, 29.3, 18.9, 18.3. ESI-MS:  $m/z$  497, 499  $[\text{M} + \text{H}]^+$ . Anal. Calcd for  $\text{C}_{24}\text{H}_{22}\text{Br}_2\text{N}_2$ : C, 57.85; H, 4.45; N, 5.62. Found: C, 57.99; H, 4.27; N, 5.90.

28. 2,4-bis(4-methoxyphenyl)-2,7,8-trimethyl-2,3-dihydro-1H-benzo[b][1,4]diazepine

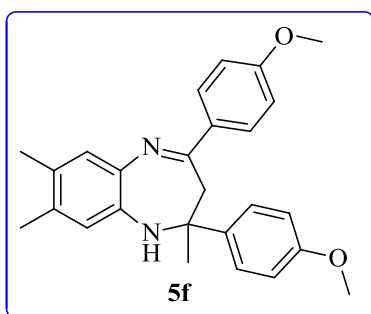

Yellow solid. mp = 130-132 °C. IR (KBr): 3449, 1611, 1461, 1038  $\text{cm}^{-1}$ .  $^1\text{H}$  NMR ( $\text{CDCl}_3$ , 400 MHz):  $\delta$  = 7.59 (d,  $J$  = 9.2 Hz, 2H), 7.55 (d,  $J$  = 9.2 Hz, 2H), 7.10 (s, 1H), 6.81 (d,  $J$  = 9.2 Hz, 2H), 6.78 (d,  $J$  = 9.2 Hz, 2H), 6.62 (s, 1H), 3.81 (s, 3H), 3.77 (s, 3H), 3.33 (brs, 1H), 3.05 (d,  $J$  = 13.2 Hz, 1H), 2.92 (d,  $J$  = 13.6 Hz, 1H), 2.25 (s, 6H), 1.72 (s, 3H).  $^{13}\text{C}$  NMR ( $\text{CDCl}_3$ , 100 MHz):  $\delta$  = 168.7, 163.0, 160.6, 142.5, 137.9, 136.5, 134.7,



131.9, 131.4, 130.9, 128.8, 124.6, 115.6, 115.5, 75.2, 57.5, 57.4, 45.2, 31.9, 21.6, 21.0.

ESI- MS:  $m/z$  401  $[M + H]^+$ . Anal. Calcd for  $C_{26}H_{28}N_2O_2$ : C, 77.97; H, 7.05; N, 6.99.

Found: C, 77.73; H, 7.02; N, 6.82.

29. 2,2,4-trimethyl-2,3-dihydro-1H-benzo[b][1,4]diazepine

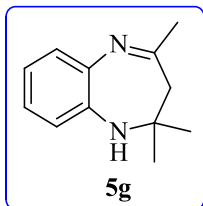

Pale brown solid. mp = 138-139 °C. IR (KBr): 3295, 1633, 1475  $cm^{-1}$ .  $^1H$  NMR ( $CDCl_3$ , 400 MHz):  $\delta$  = 7.17 (s, 1H), 7.04-7.02 (m, 1H), 6.92-6.87 (m, 2H), 6.65-6.63 (m, 1H), 2.27 (s, 3H), 2.13 (s, 2H), 1.25 (s, 6H).  $^{13}C$  NMR ( $CDCl_3$ , 100 MHz):  $\delta$  = 172.0, 140.2, 137.4, 126.3, 125.0, 121.6, 121.2, 67.9, 44.6, 30.0, 29.3. ESI-MS:  $m/z$  189  $[M + H]^+$ . Anal Calcd for  $C_{12}H_{16}N_2$ : C, 76.55; H, 8.57; N, 14.88. Found: C, 76.67; H, 8.76; N, 14.84.

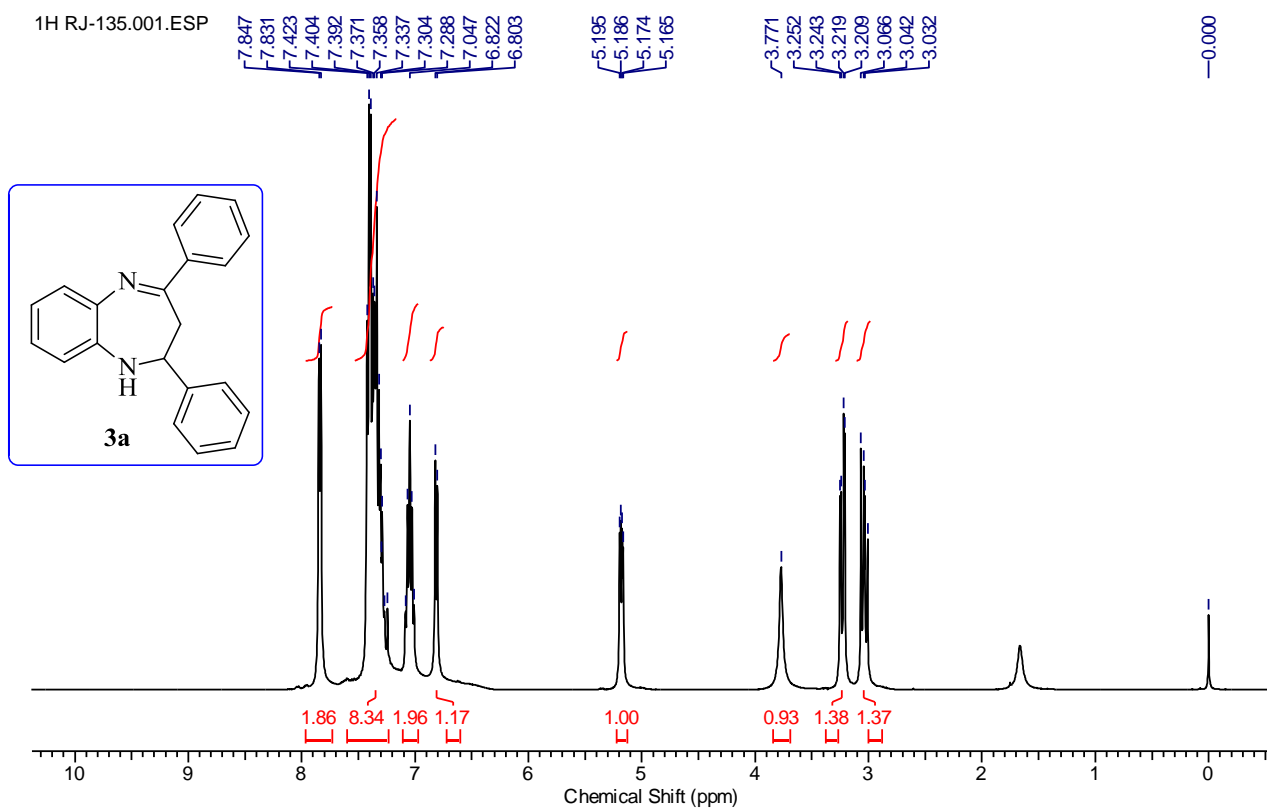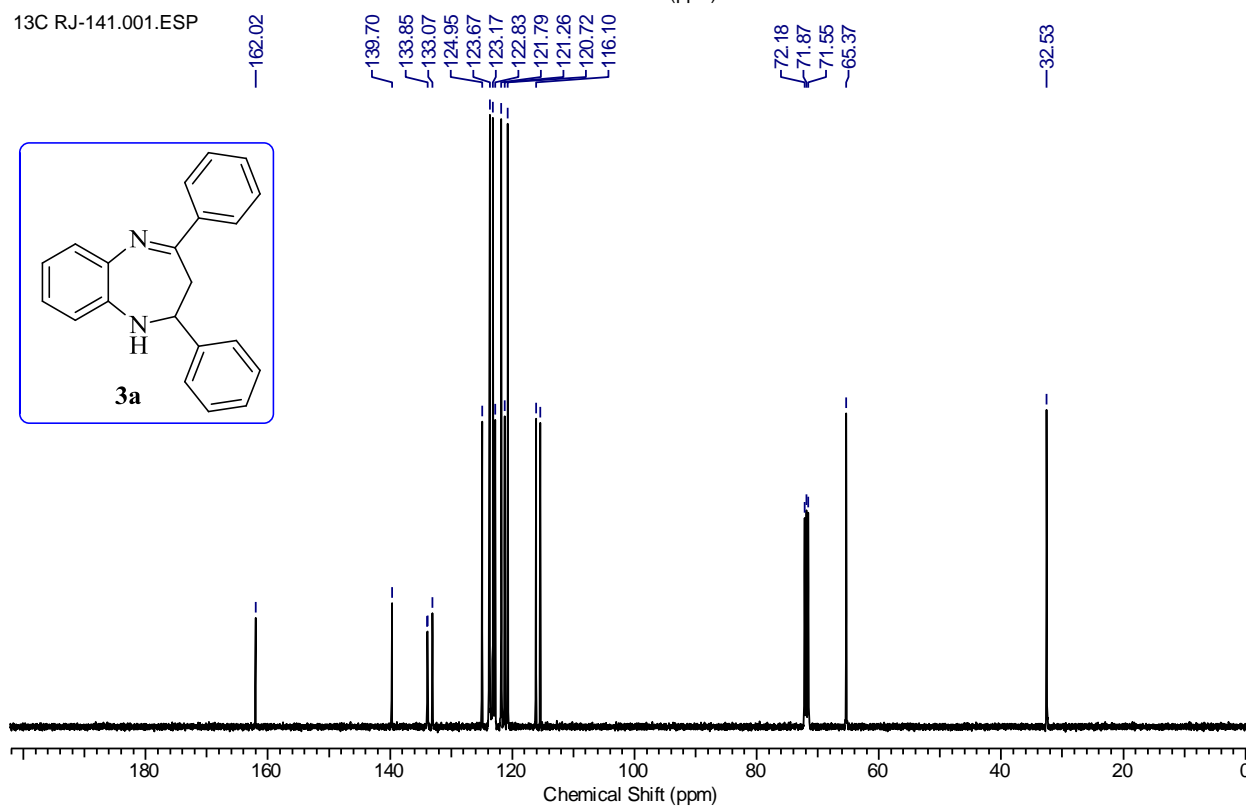

1H RJ-163.001.ESP

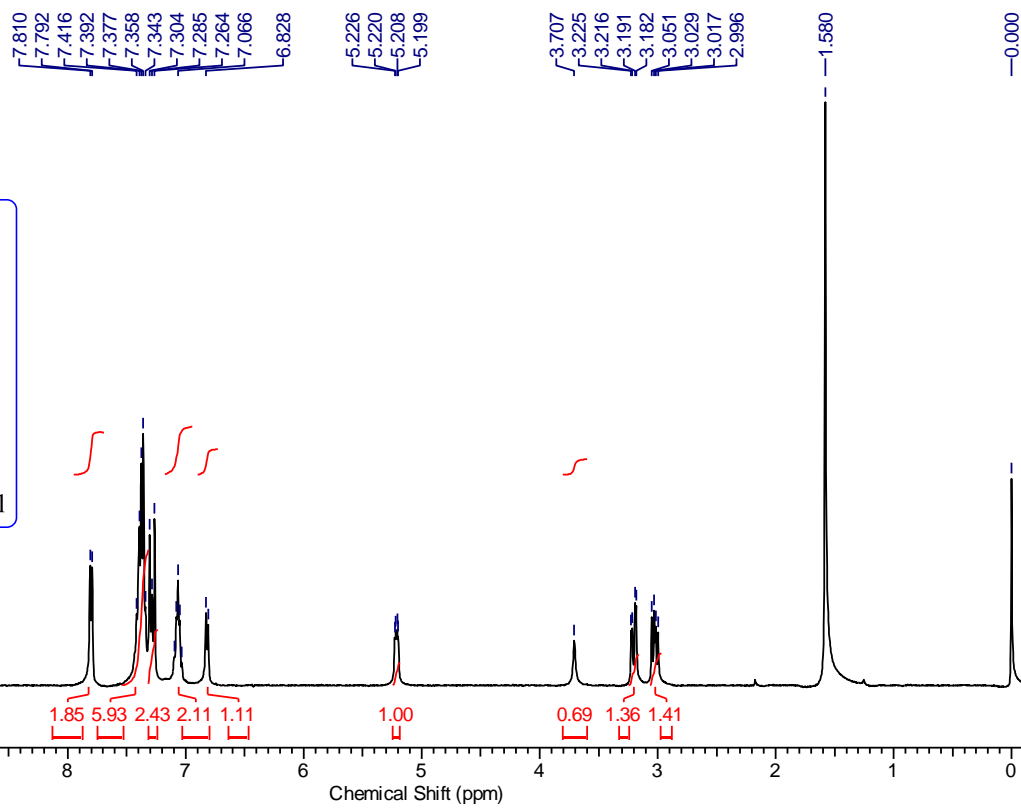

13C RJ-163C.001.ESP

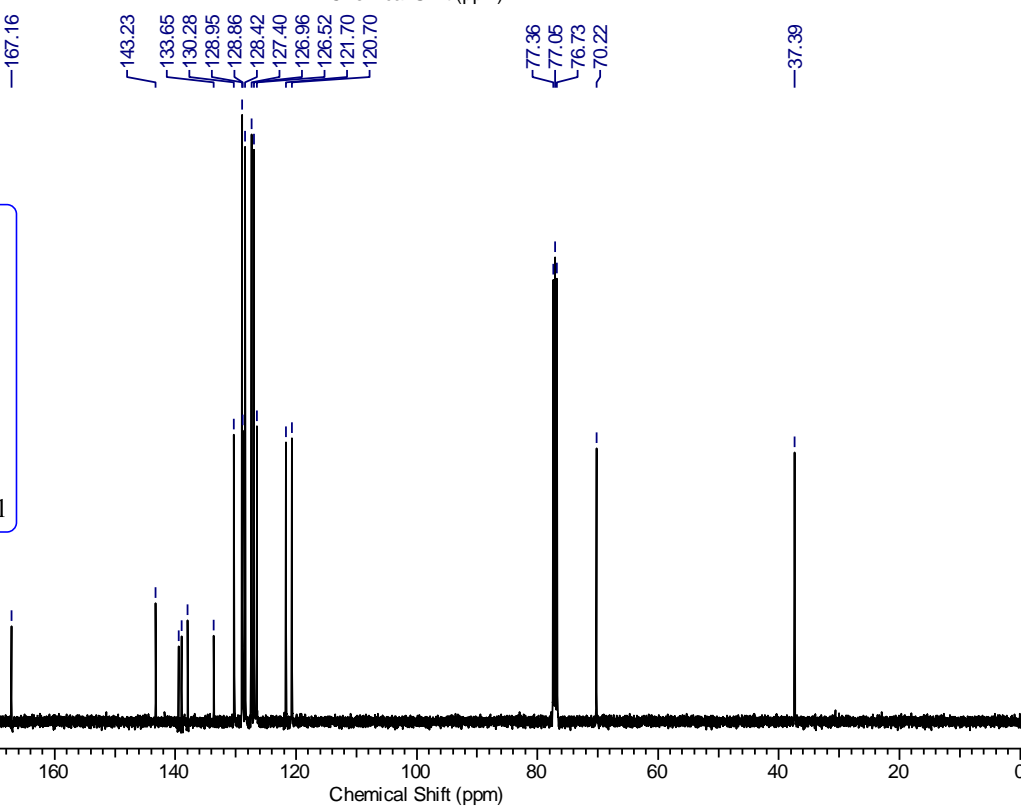

1H RJ-161.001.ESP

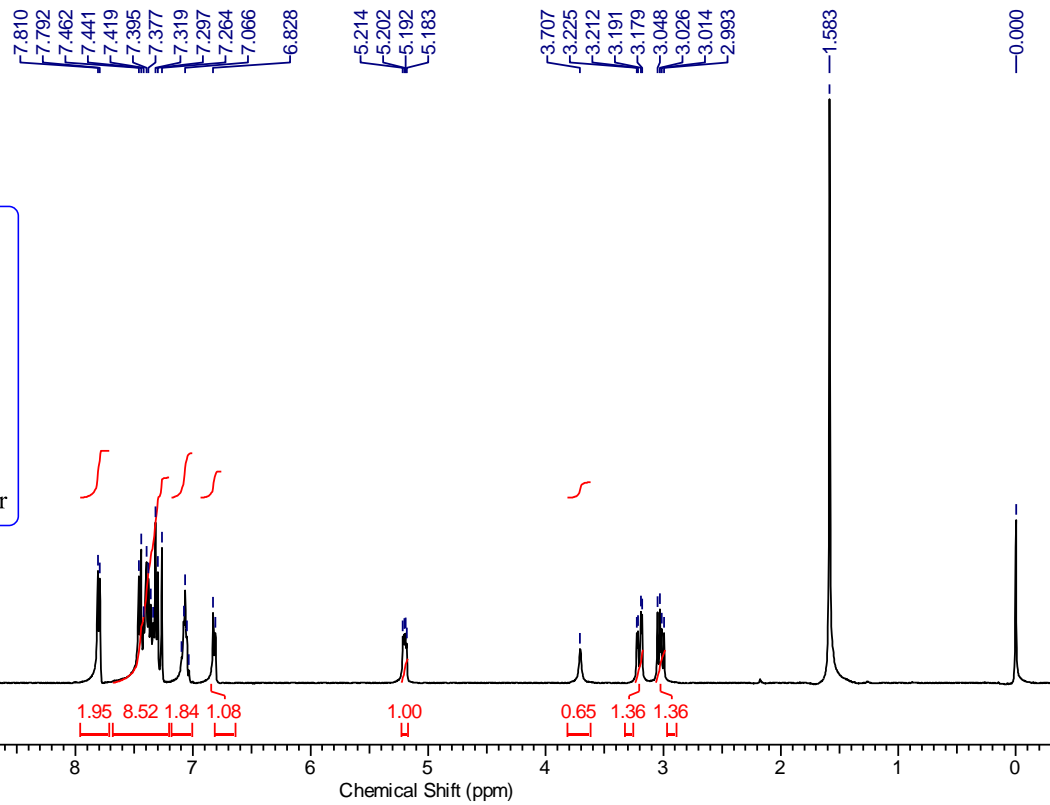

13C RJ-161C.001.ESP

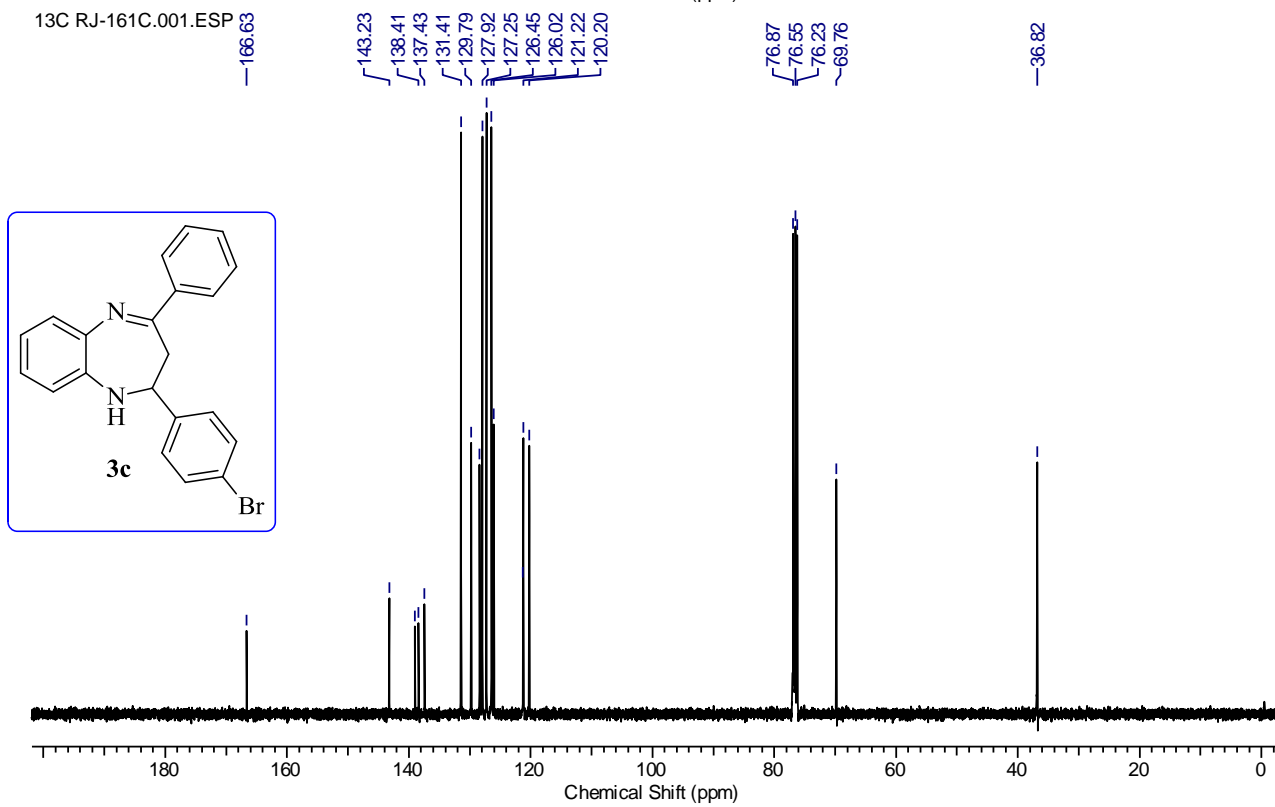

1H RJ-167.001.ESP

7.883  
7.865  
7.413  
7.395  
7.340  
7.313  
7.294  
7.261  
7.166  
7.148  
7.008  
6.812  
6.7945.150  
5.141  
5.125  
5.1163.740  
3.249  
3.240  
3.216  
3.206  
3.054  
3.029  
3.020  
2.996  
2.349

1.586

0.000

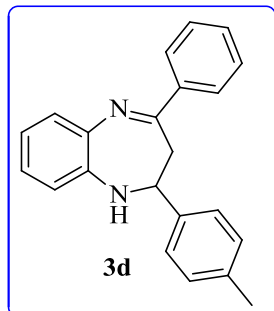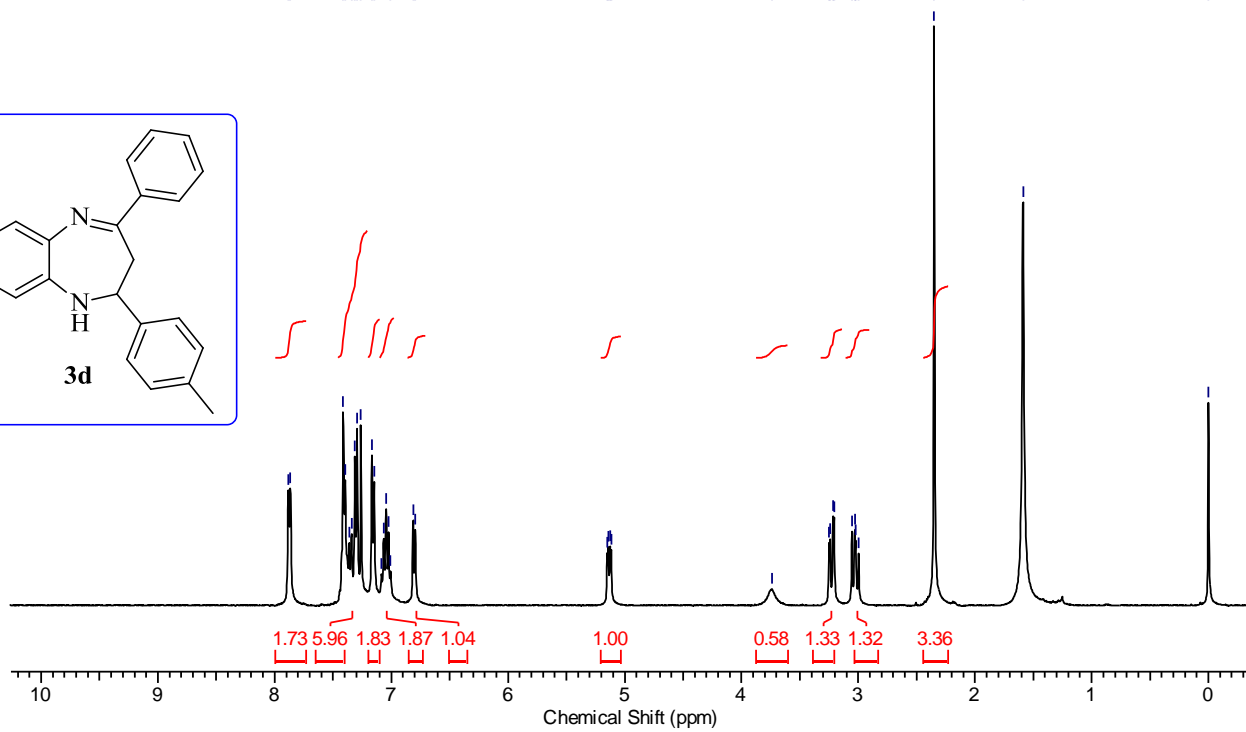

13C RJ-173.001.ESP

166.73

141.60  
138.54  
137.76  
137.33  
129.66  
129.03  
128.49  
127.91  
126.52  
125.96  
125.31  
120.73  
120.1276.86  
76.54  
76.22

69.73

37.41

20.63

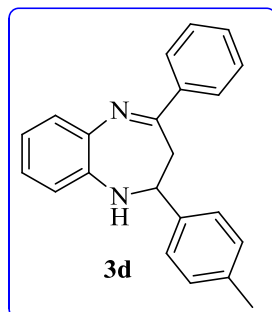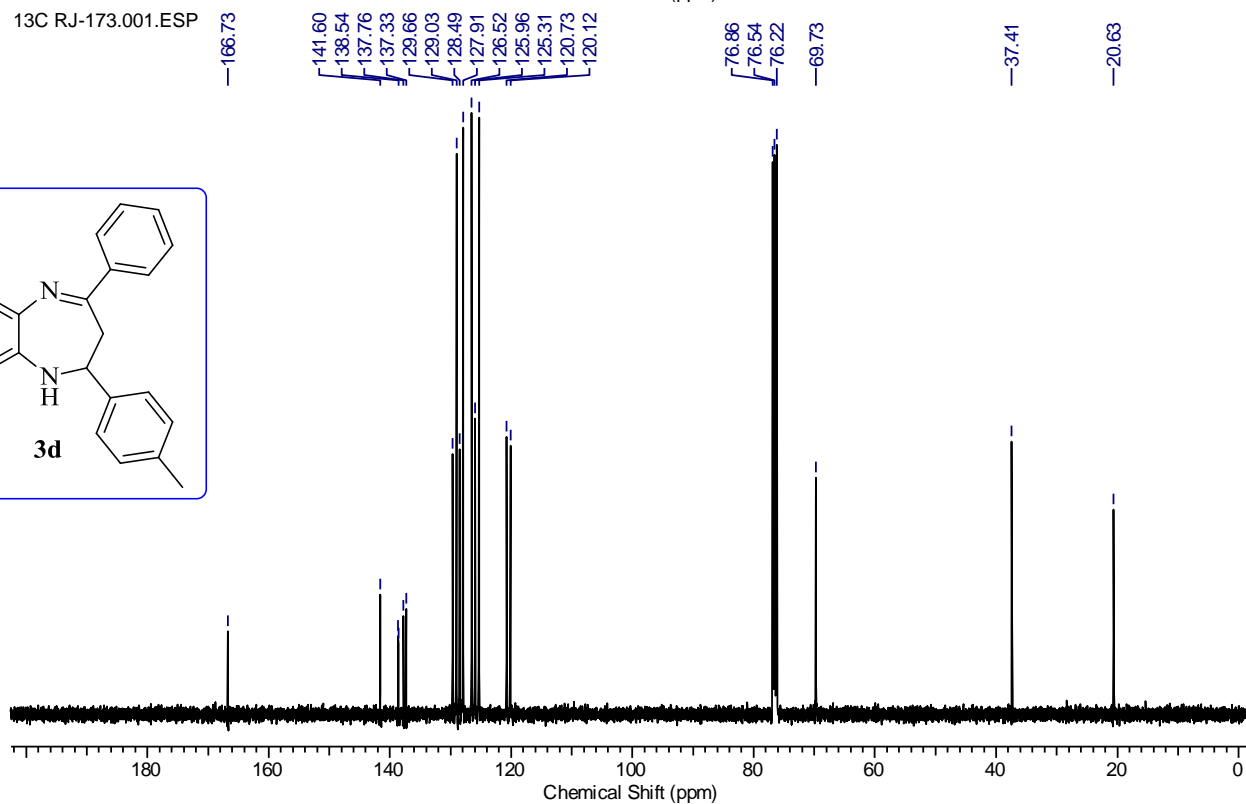

1H RJ-164.001.ESP

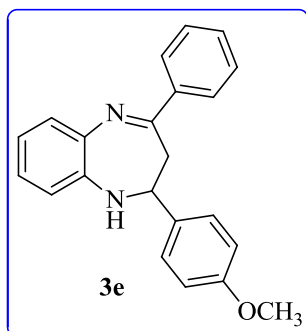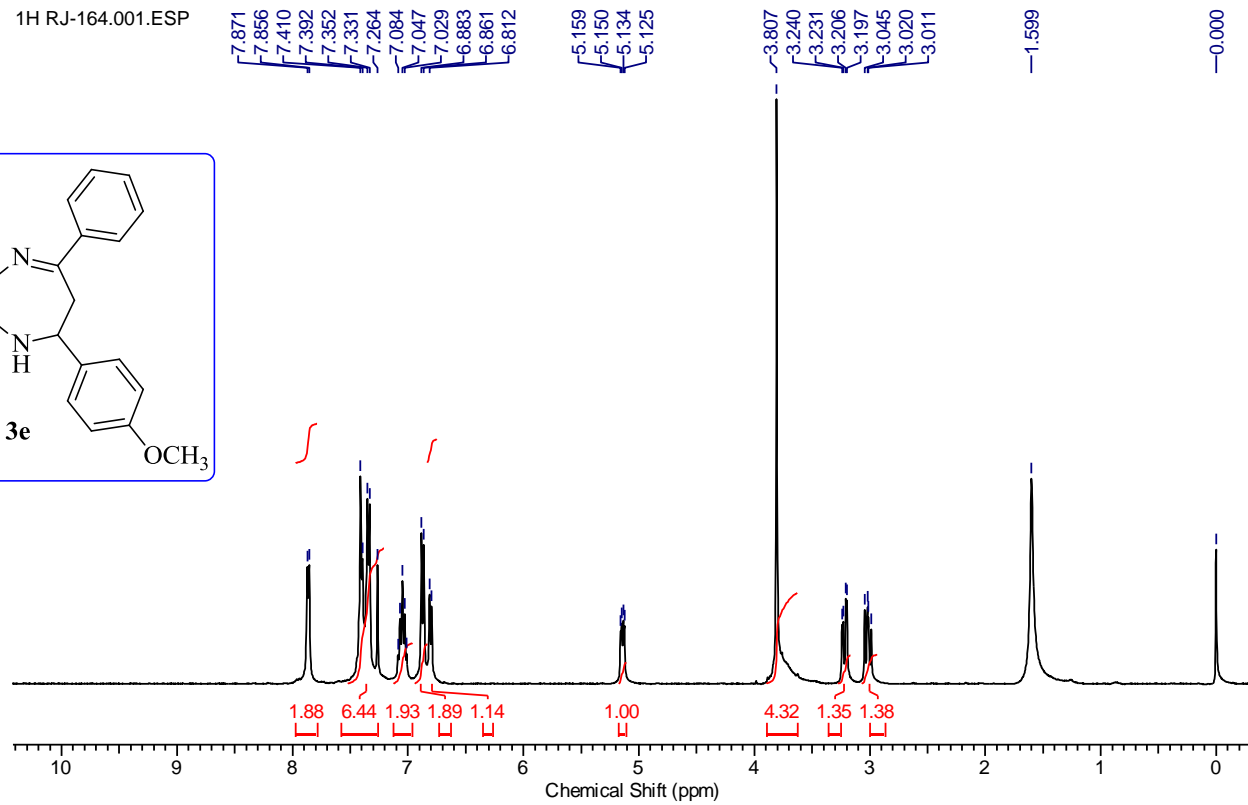

13C RJ-173A.001.ESP

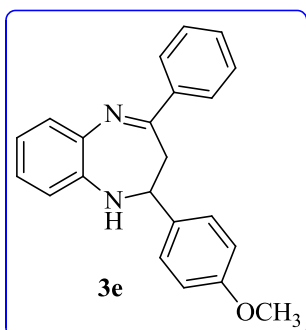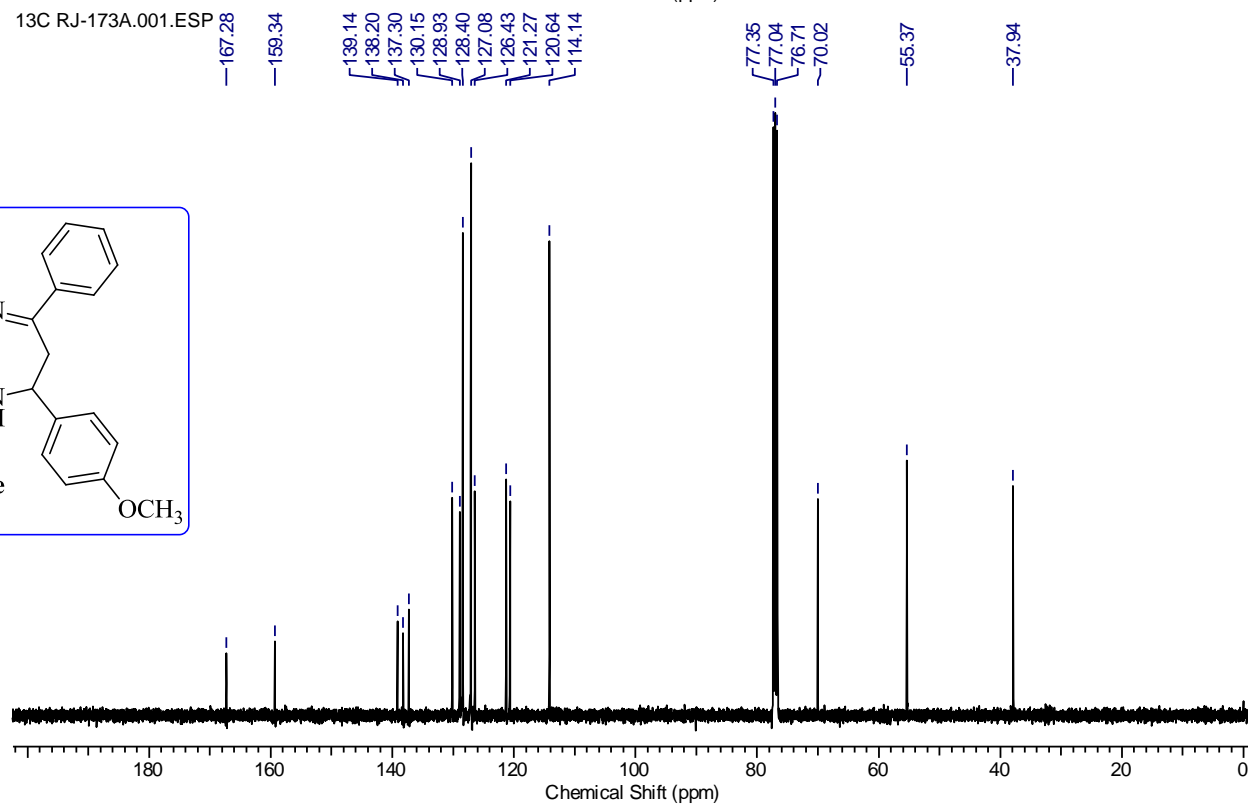

1H RJ-155.001.ESP

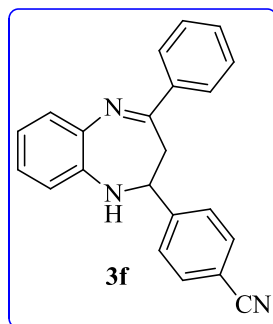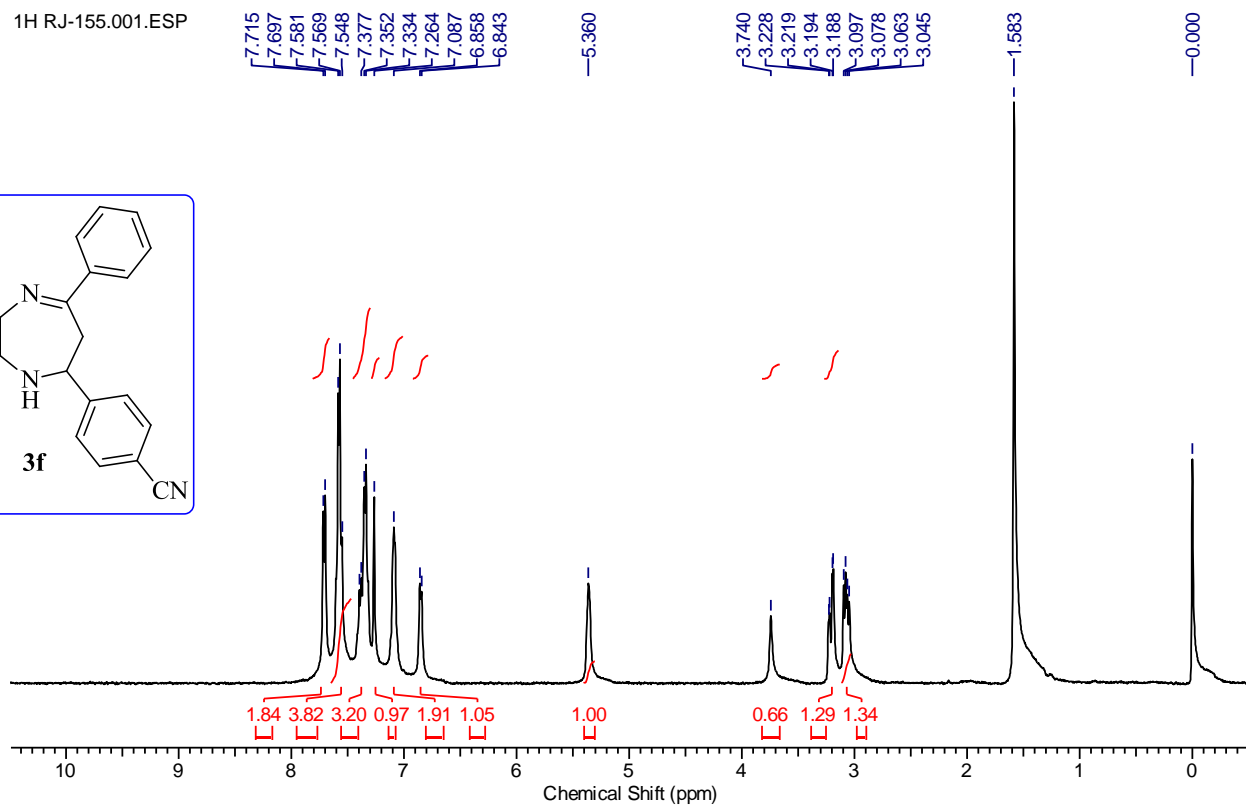

13C RJ-148.001.ESP

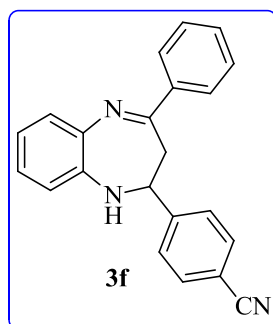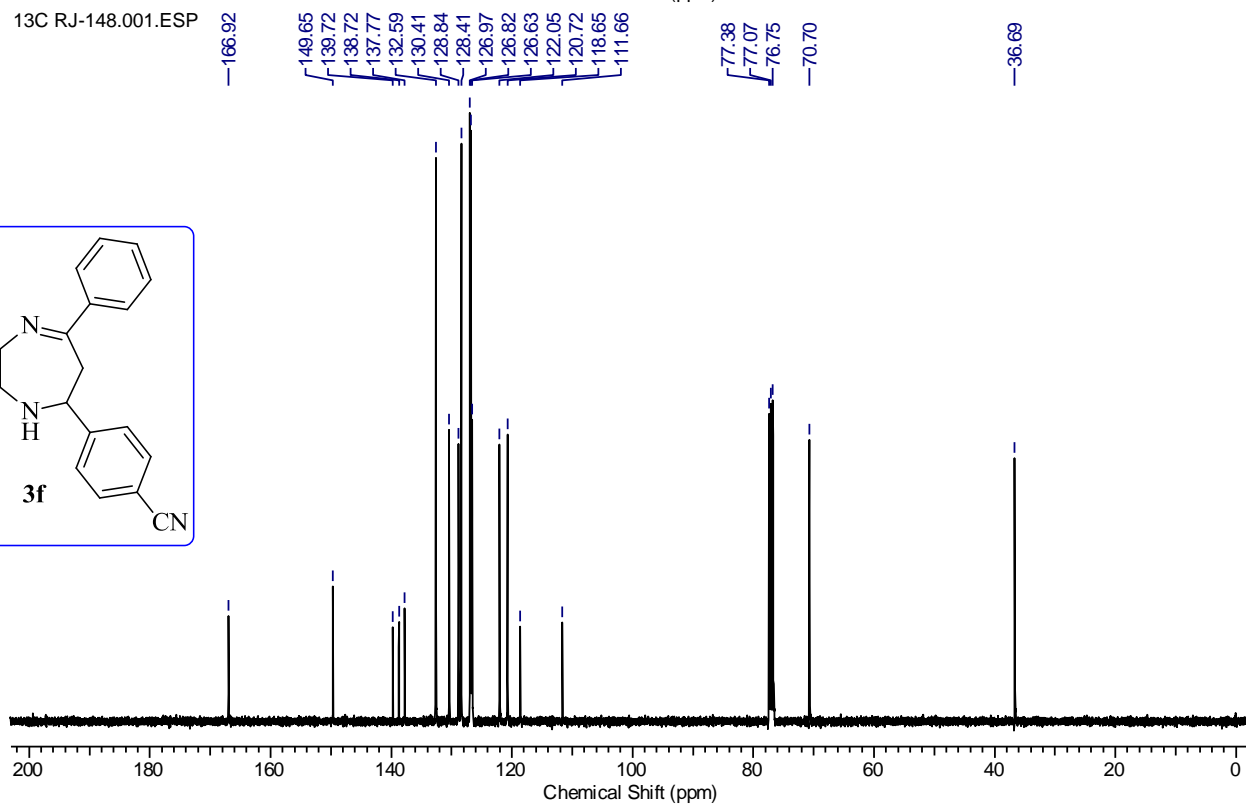

1H RJ -171.001.ESP

7.746  
7.725  
7.432  
7.413  
7.358  
7.343  
7.334  
7.313  
7.297  
7.264  
6.837  
6.818

5.214  
5.205  
5.192  
5.183

3.789  
3.219  
3.209  
3.185  
3.176  
3.057  
3.039  
3.023  
3.002

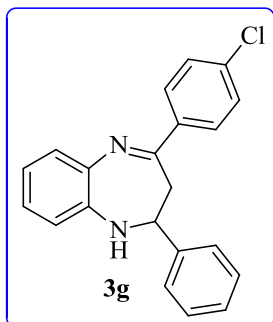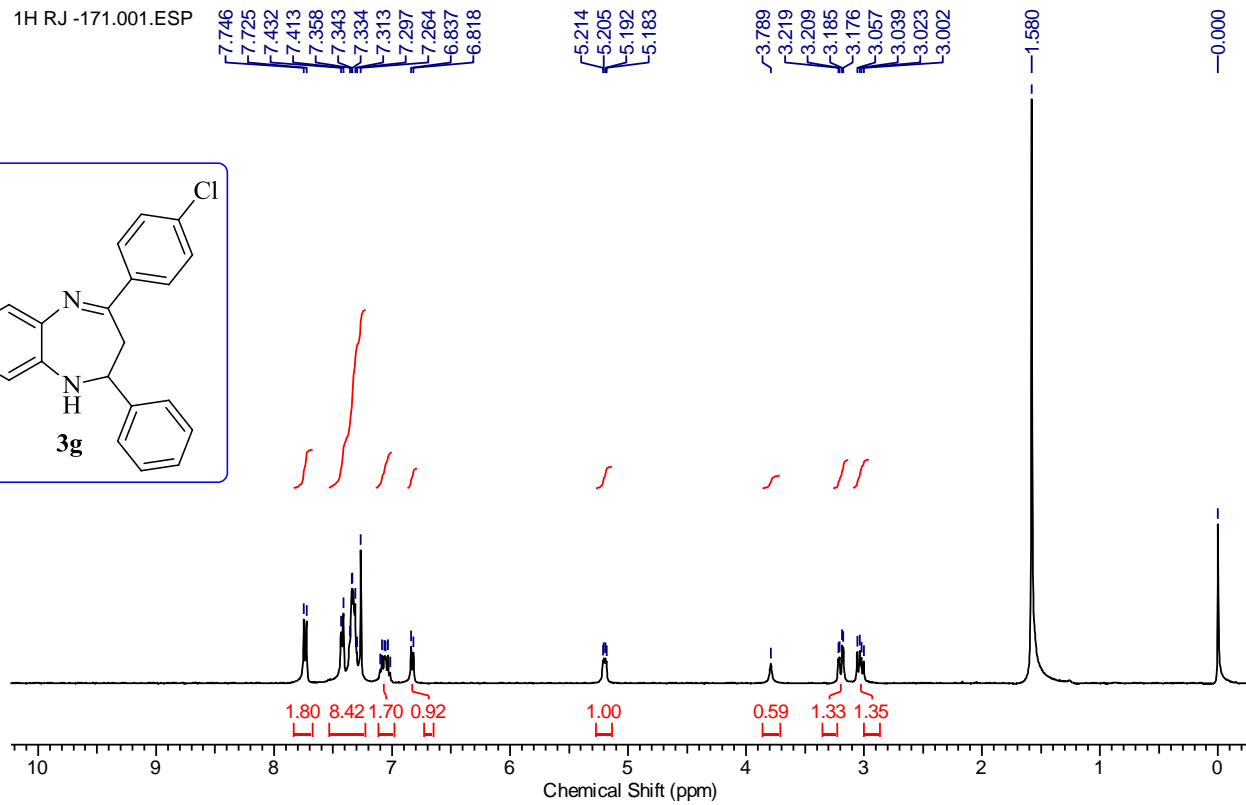

13C RJ -176.001.ESP

166.01

144.63  
138.93  
138.38  
129.02  
128.92  
128.52  
128.33  
128.15  
126.71  
125.96  
121.44  
120.64

77.36  
77.04  
76.72  
70.60

37.70

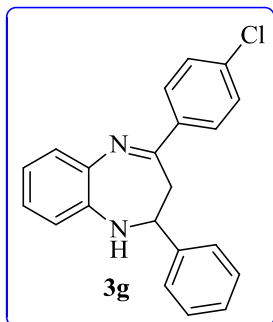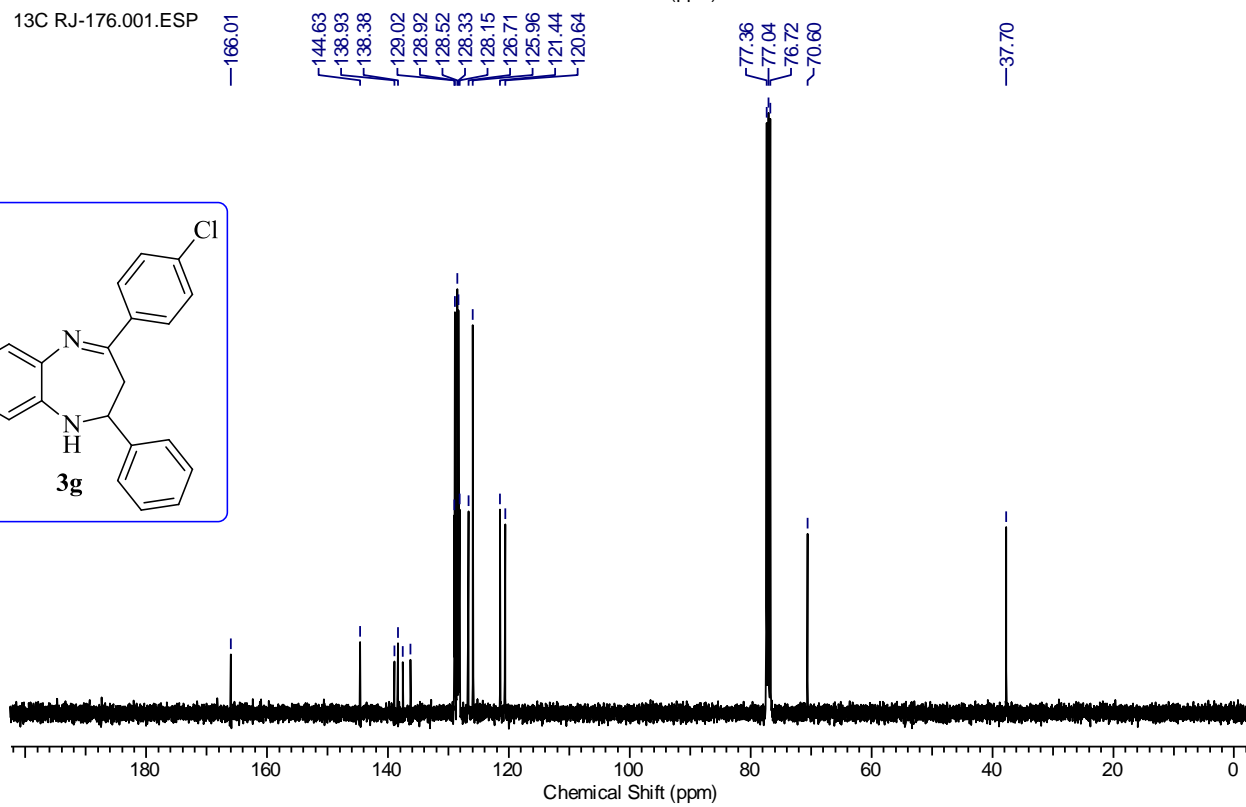



1H RJ-142.001.ESP

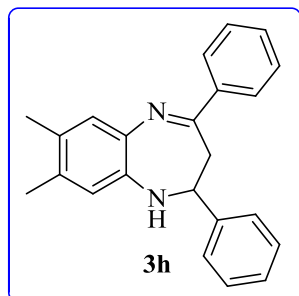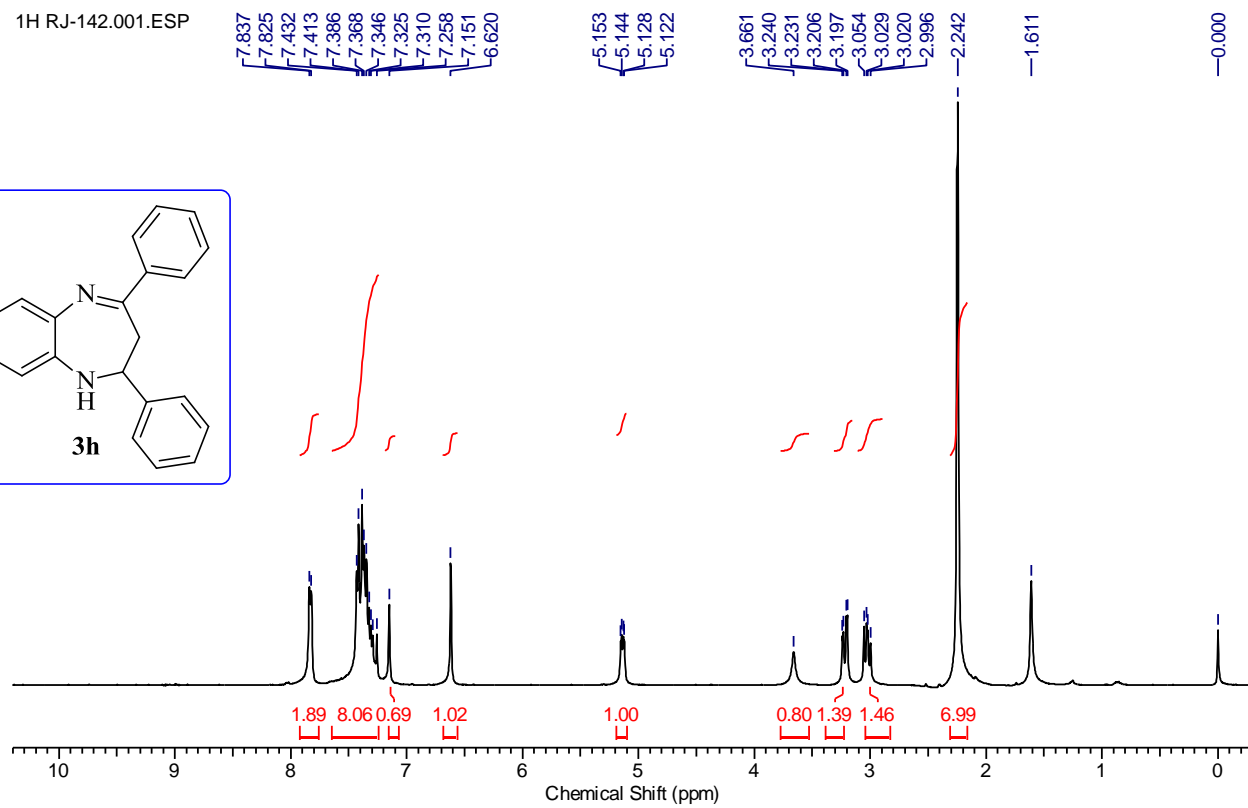

13C RJ-147.001.ESP

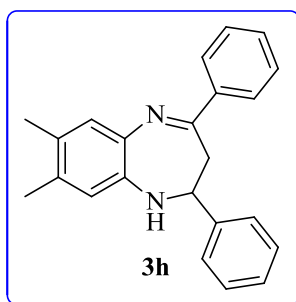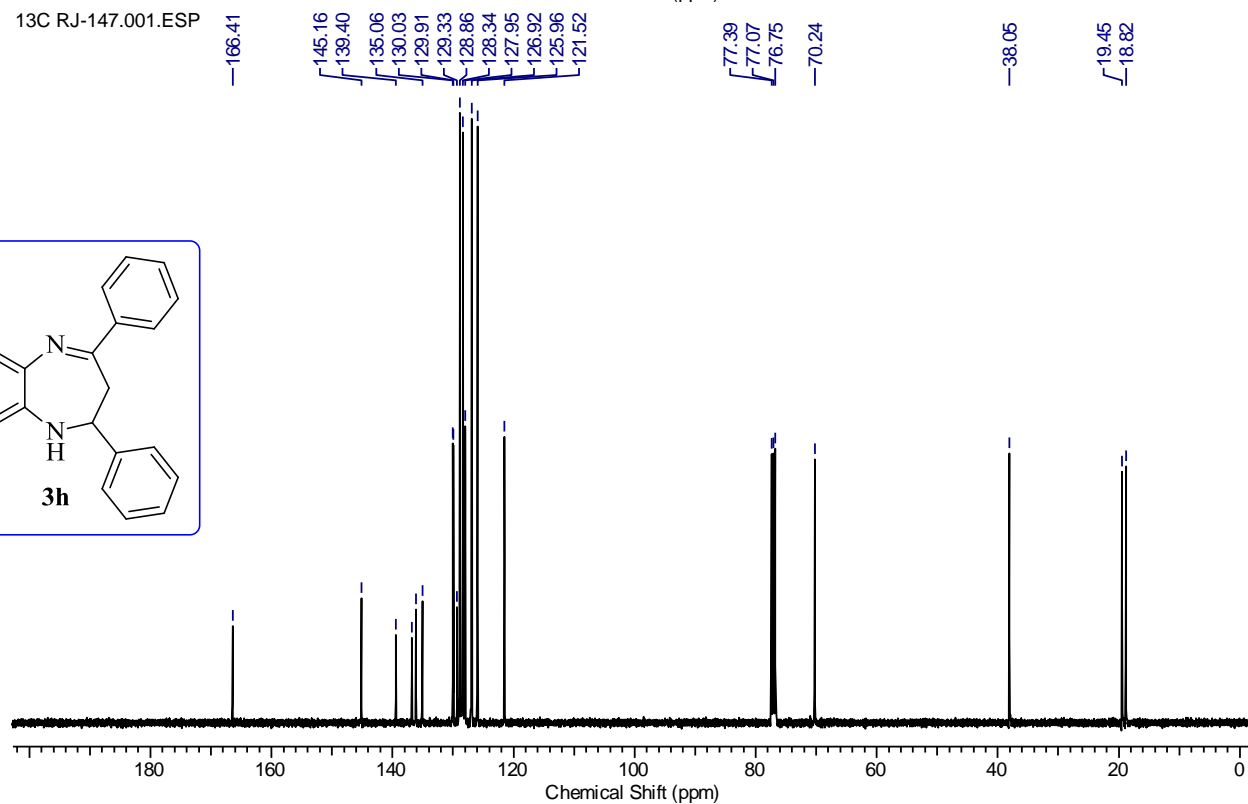

1H 179.001.ESP

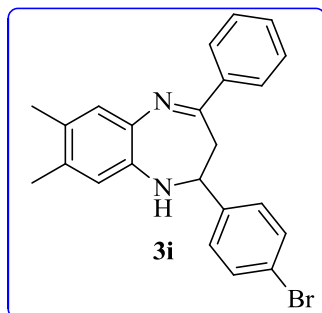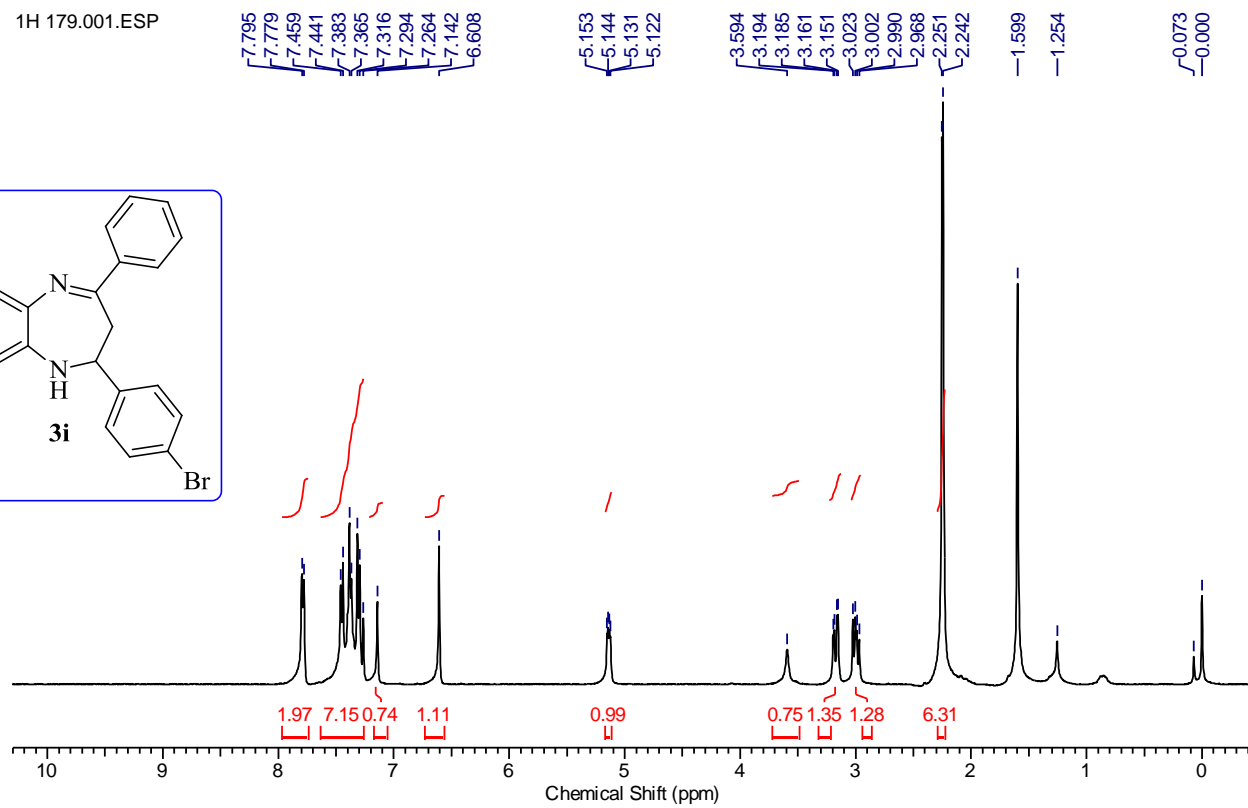

13C RJ-181.001.ESP

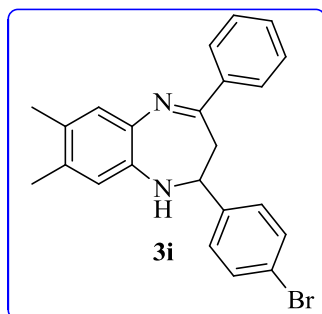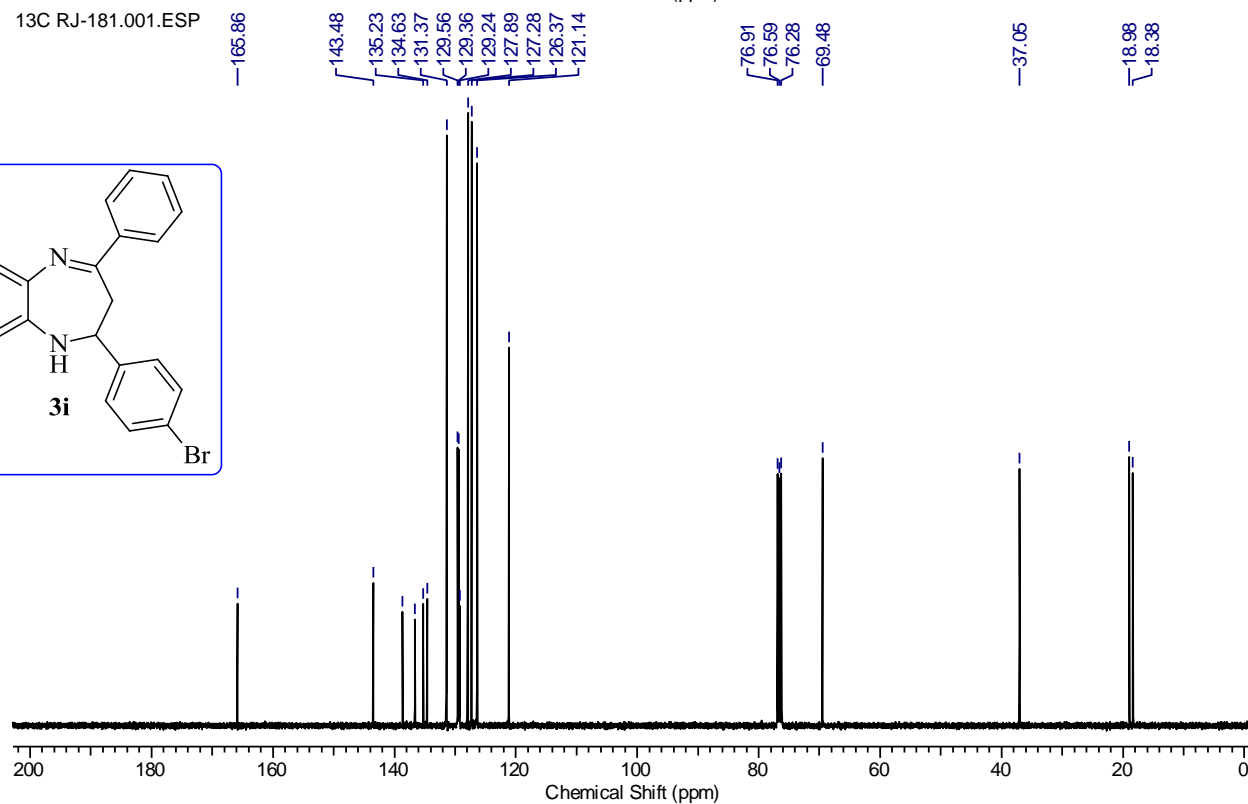

1H RJ-182.001.ESP

7.865  
7.853  
7.847  
7.392  
7.380  
7.313  
7.291  
7.258  
7.166  
7.148  
6.5965.092  
5.086  
5.070  
5.0613.630  
3.228  
3.219  
3.191  
3.185  
3.036  
3.011  
3.002  
2.978  
2.349  
2.248  
2.2361.617  
1.254

0.000

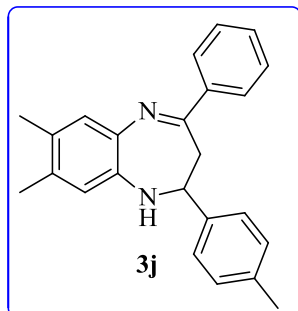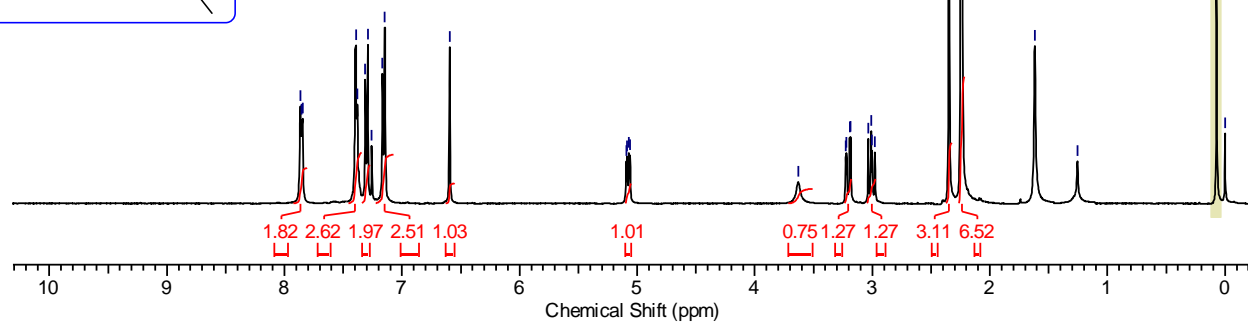

RJ-309-13C.001.ESP

166.88

147.86  
137.70  
136.83  
134.88  
129.67  
129.48  
128.33  
128.28  
127.98  
127.00  
125.83  
125.45  
122.3177.25  
77.02  
76.81  
73.18

43.33

29.88

19.39  
18.80

0.000

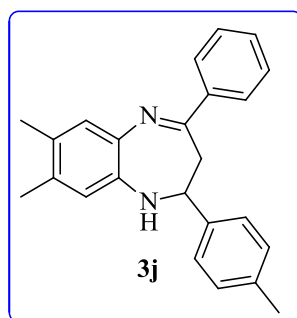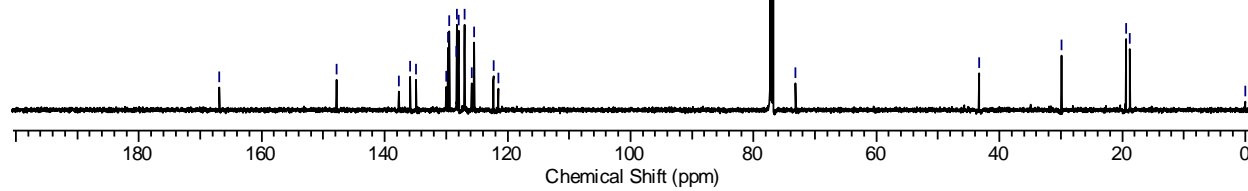

1H RJ -170A.002.ESP

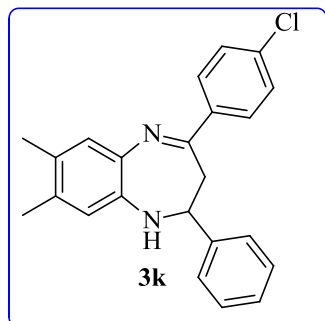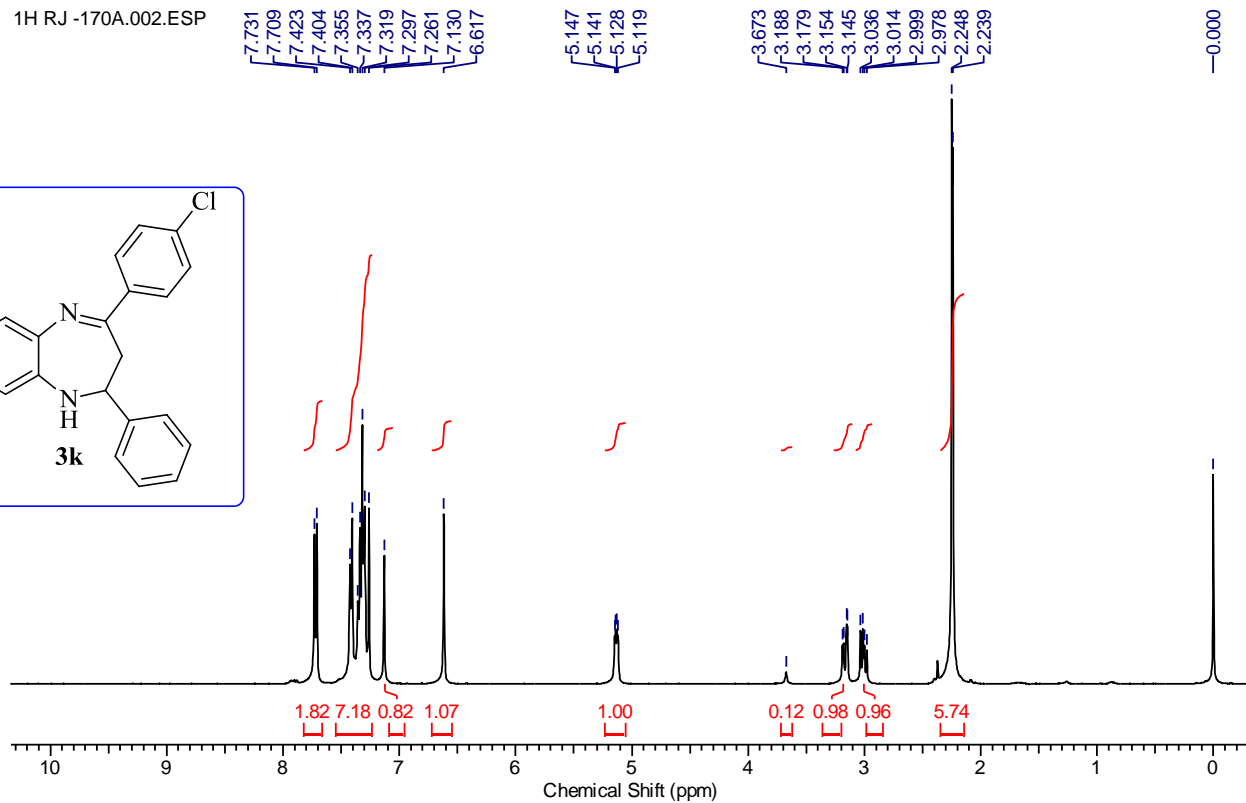

13C RJ -175.001.ESP

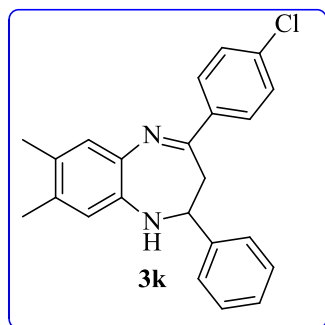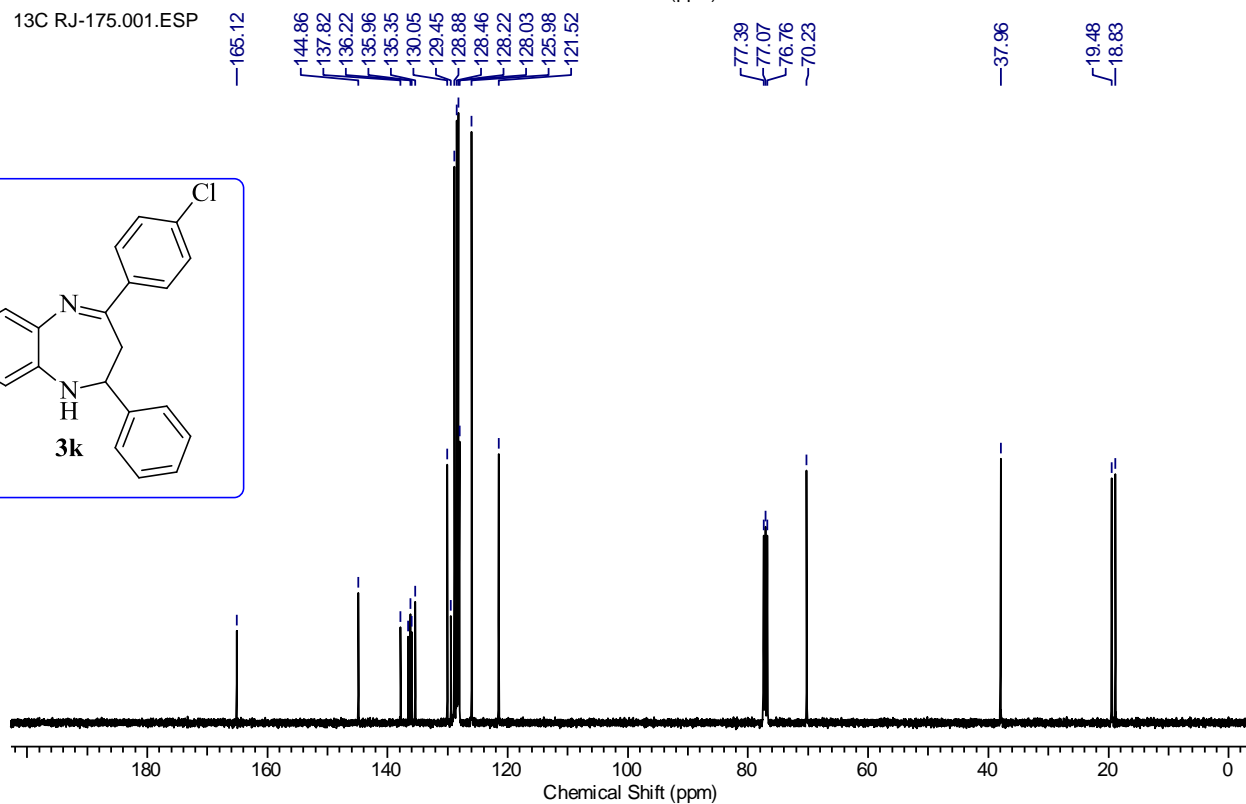

RJ-301.ESP

7.380  
7.309  
7.256  
7.060  
7.005  
6.986  
6.798  
6.615  
6.303  
6.246  
6.198  
5.251  
5.242  
3.705  
3.312  
3.283  
3.137  
3.115  
3.083

-0.000

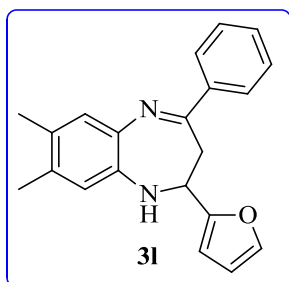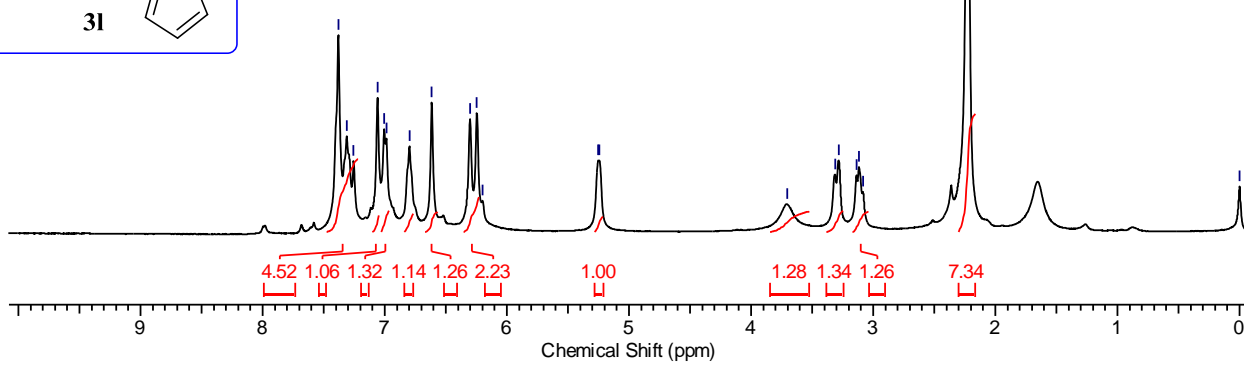

13C RJ-209.001.ESP

170.54  
162.57  
156.00  
141.93  
136.03  
135.78  
134.01  
132.71  
130.60  
128.54  
127.94  
122.32  
119.28  
118.35  
117.99  
110.38  
105.64  
77.36  
77.04  
76.73  
63.59  
33.16  
19.42  
18.85

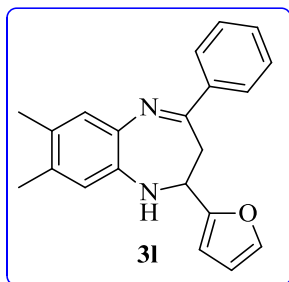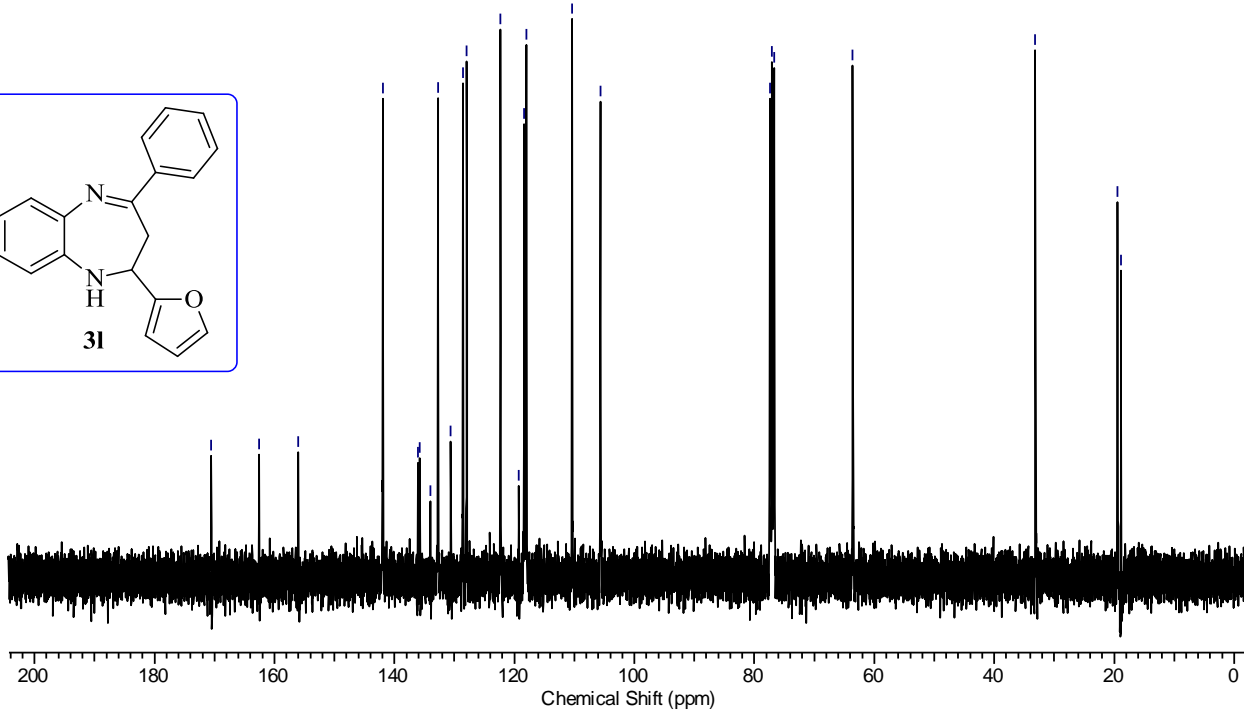

MS-RJ-138-004.ESP

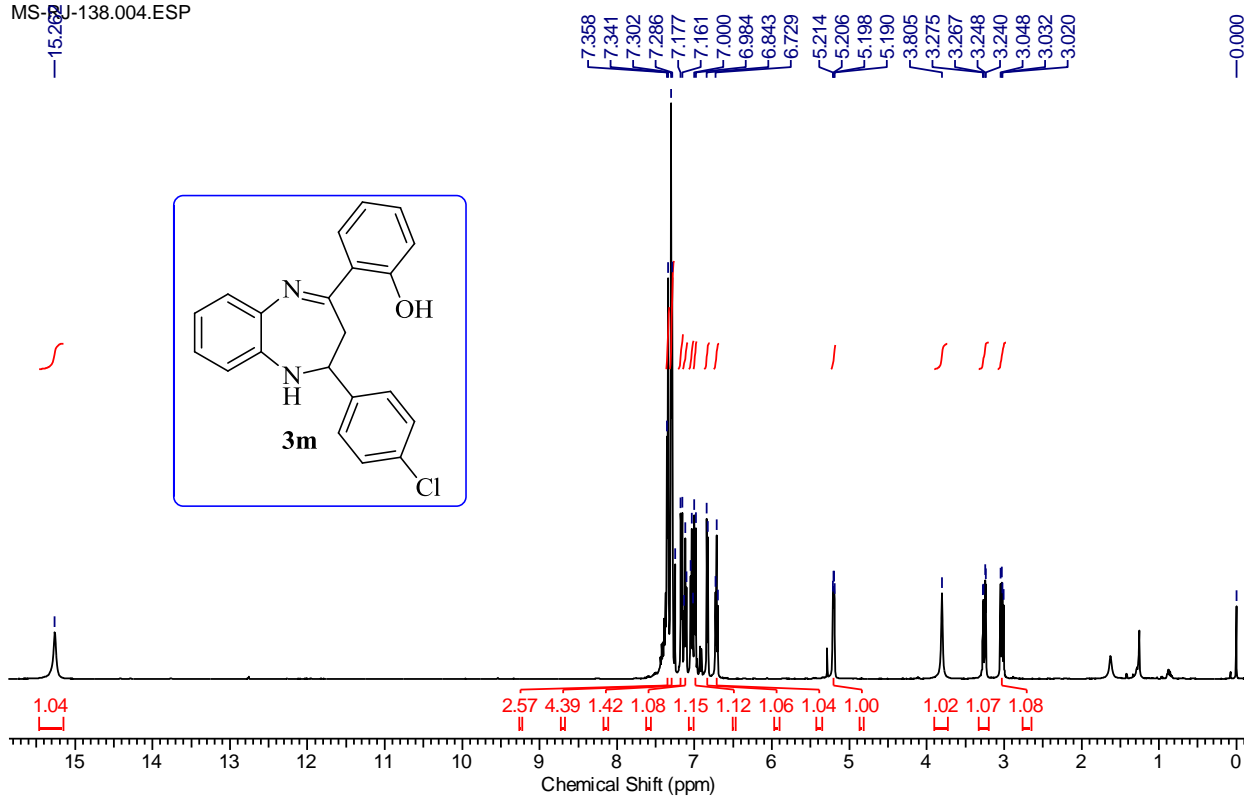

MS-RJ-138-13C.001.ESP

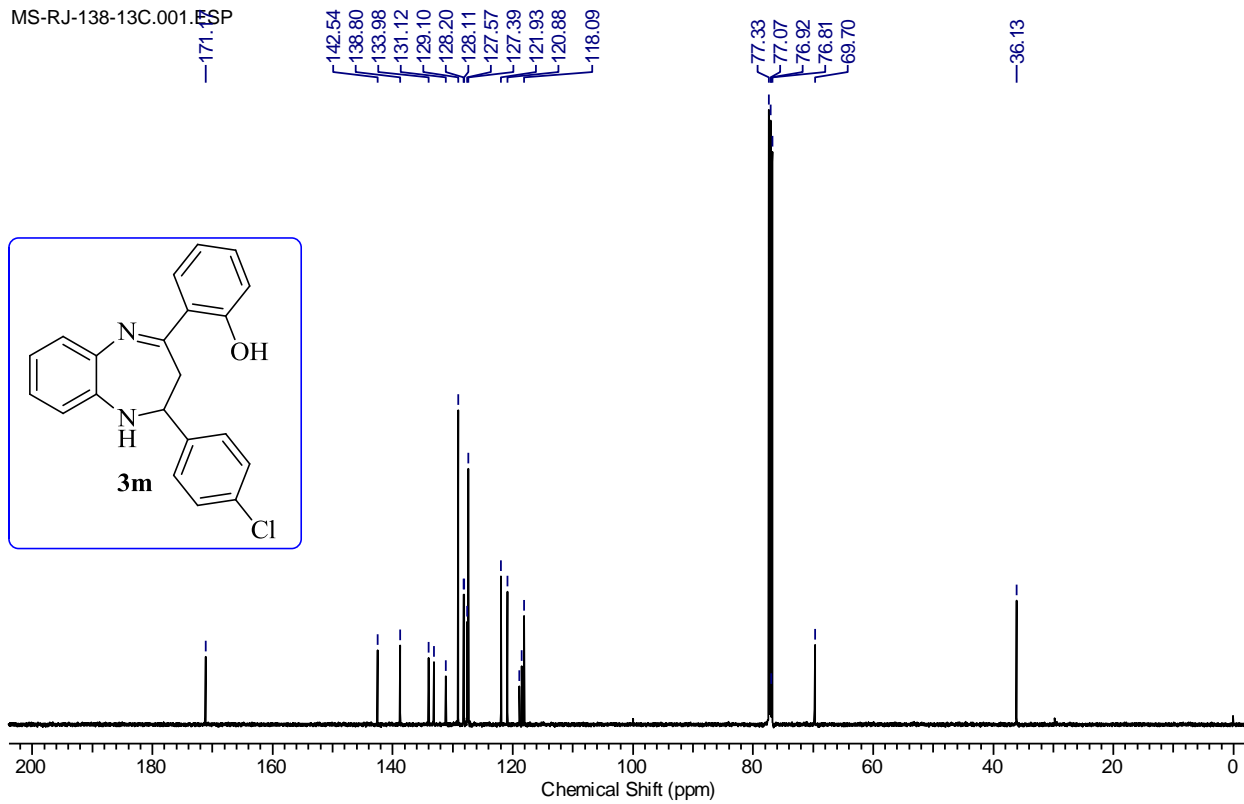

1H RJ-357.001.esp

-15.018

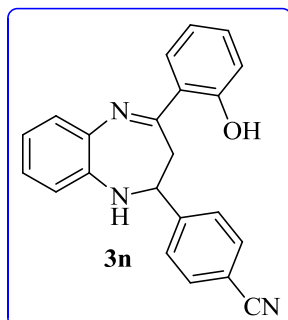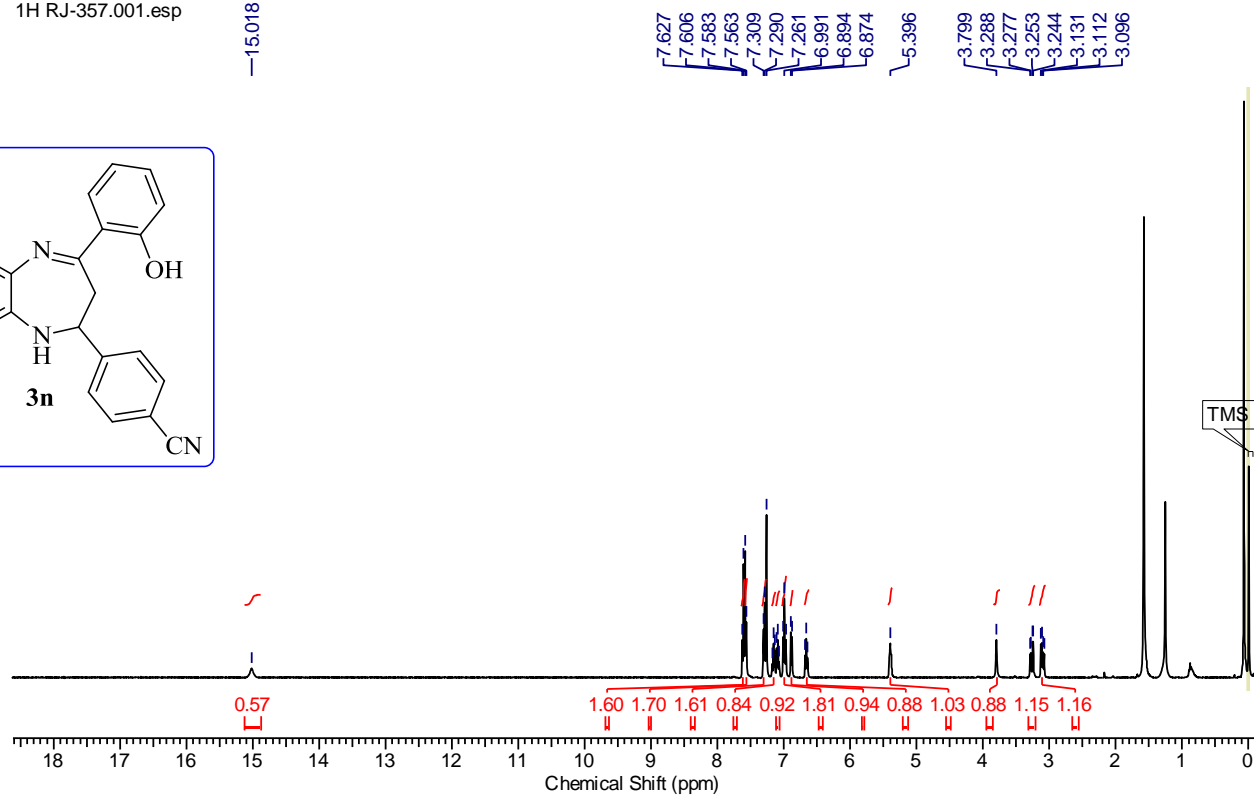

MS-RJ-F.002.ESP

-171.25

-161.99

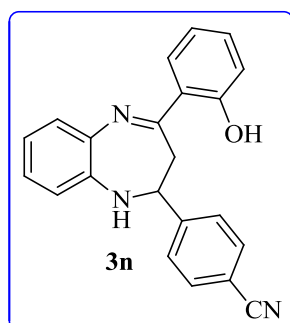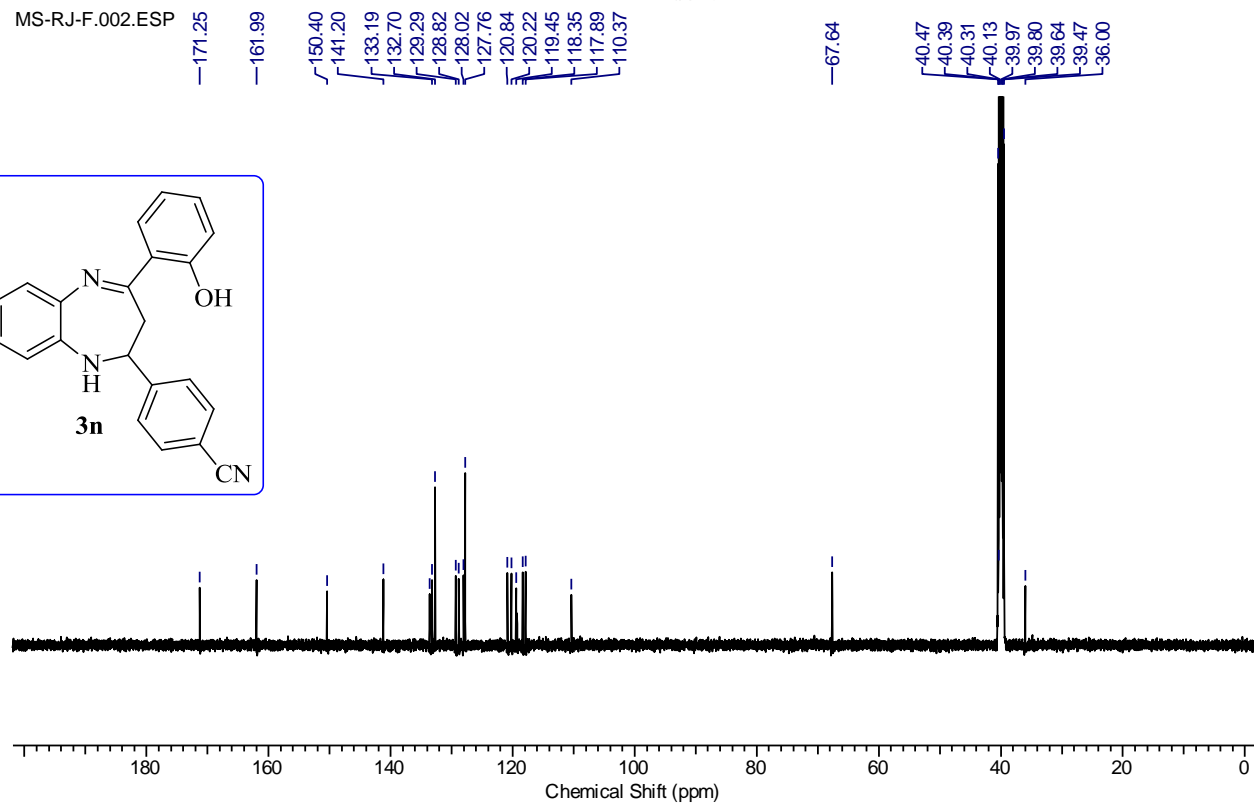

MS-RJ-E.001.ESP

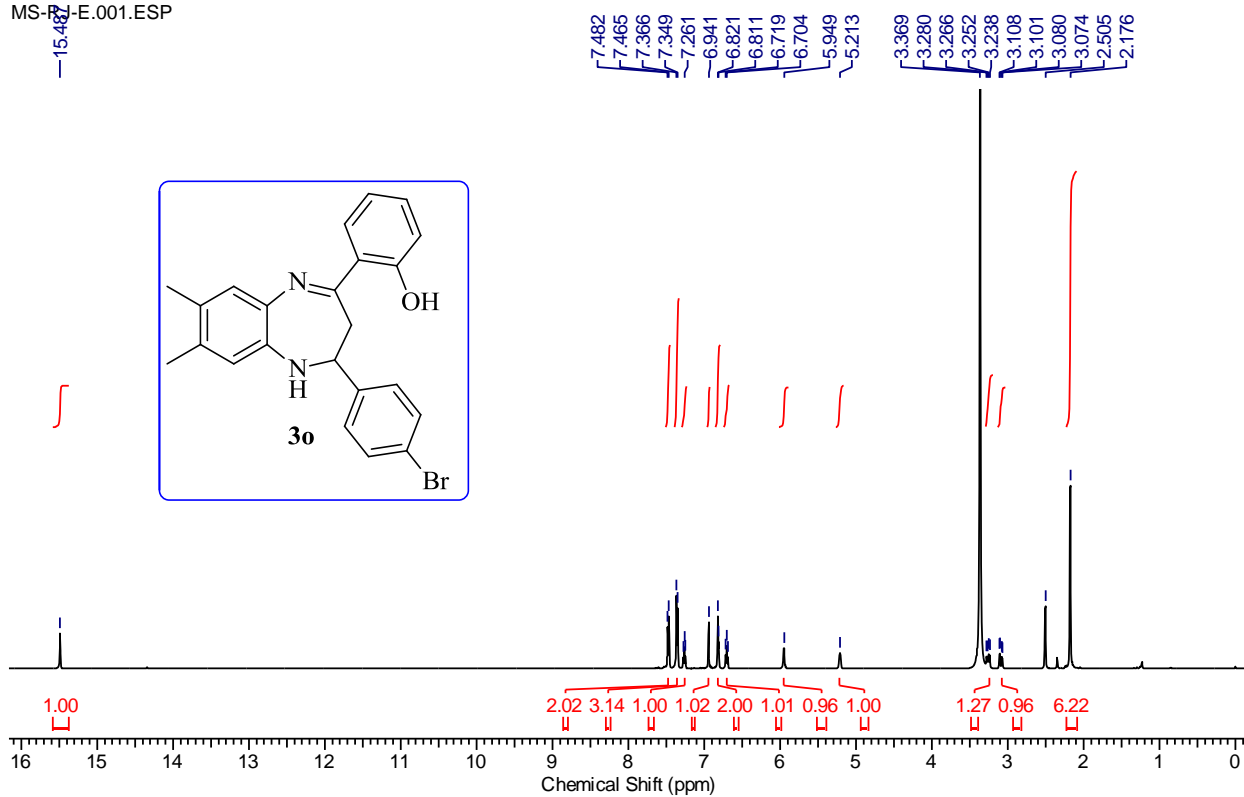

MS-RJ-E.002.ESP

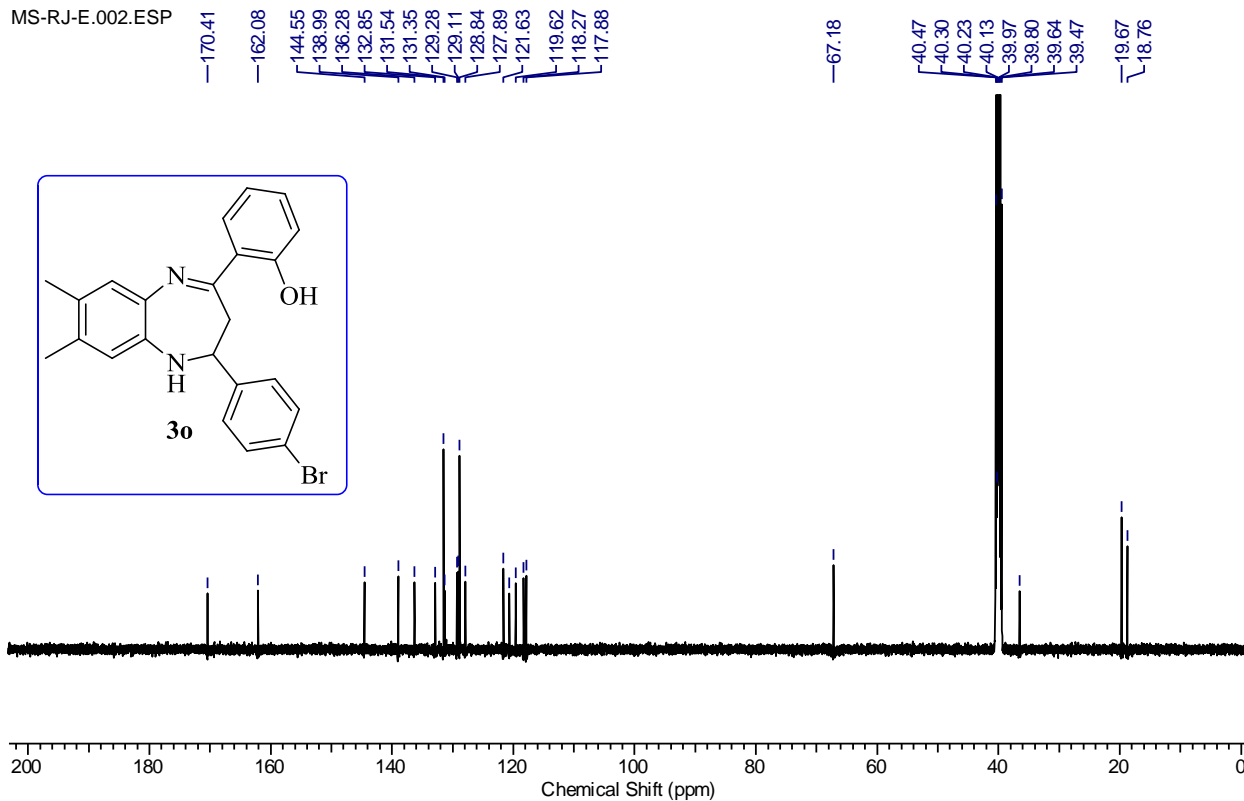



MS-RJ-D.001.ESP

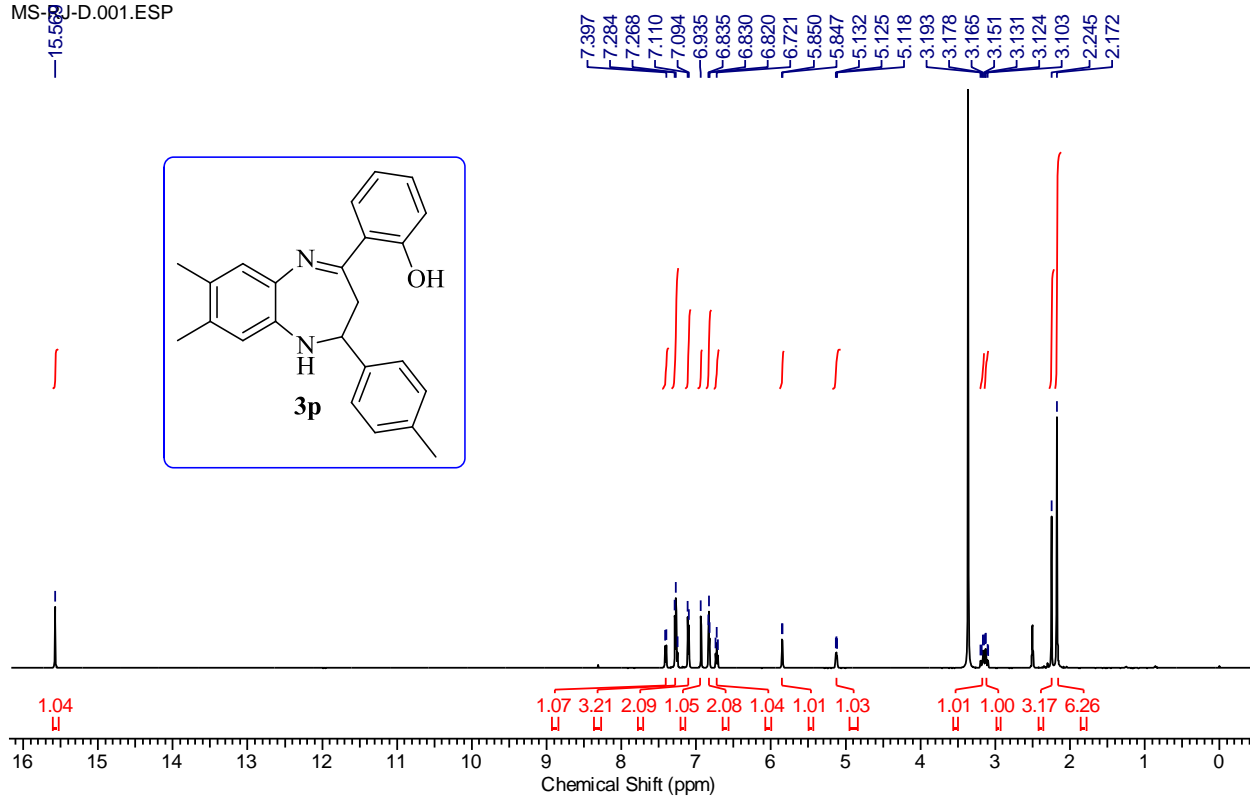

MS-RJ-D.002.ESP

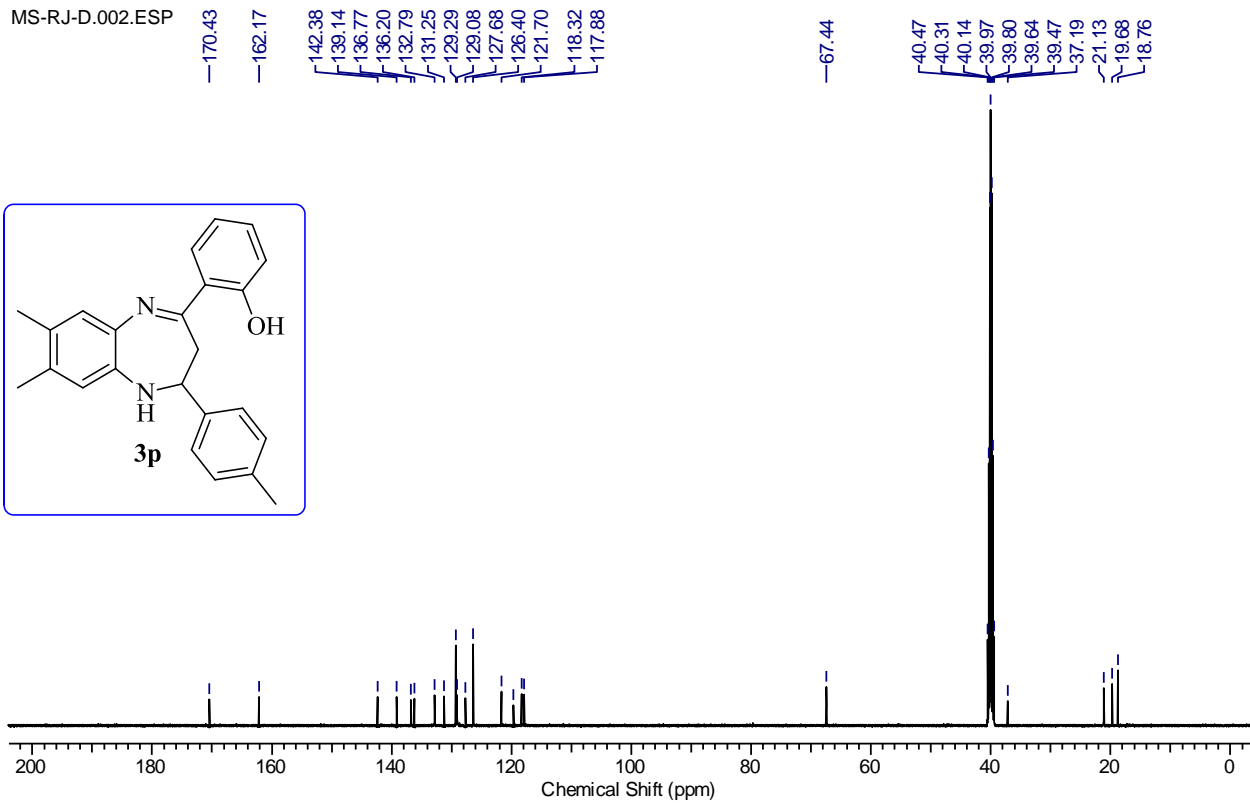

MS-RJ-B.001.ESP

-15.597

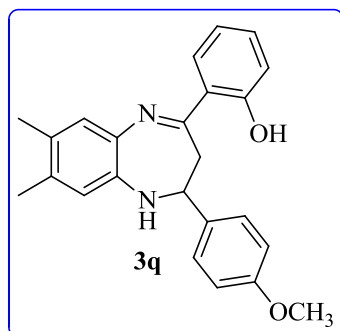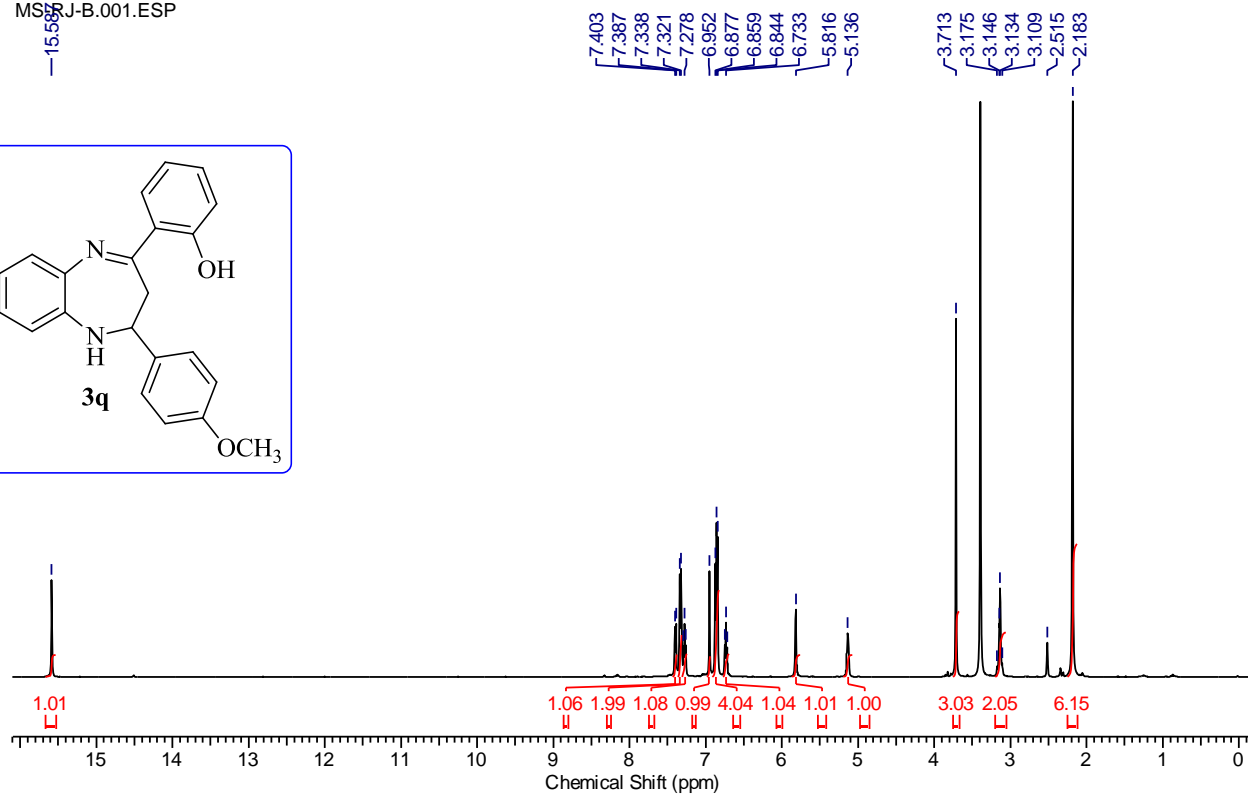

MS-RJ-B.002.ESP

-170.57

-162.20

-158.95

-139.10

-137.48

-136.16

-132.78

-131.37

-129.19

-129.09

-127.73

-127.62

-121.75

-119.68

-118.32

-117.89

-114.10

-67.40

-55.54

-40.47

-40.31

-40.13

-39.97

-39.80

-39.64

-39.47

-37.27

-19.67

-18.76

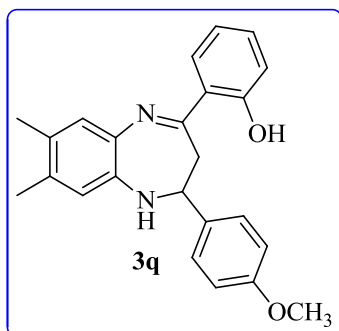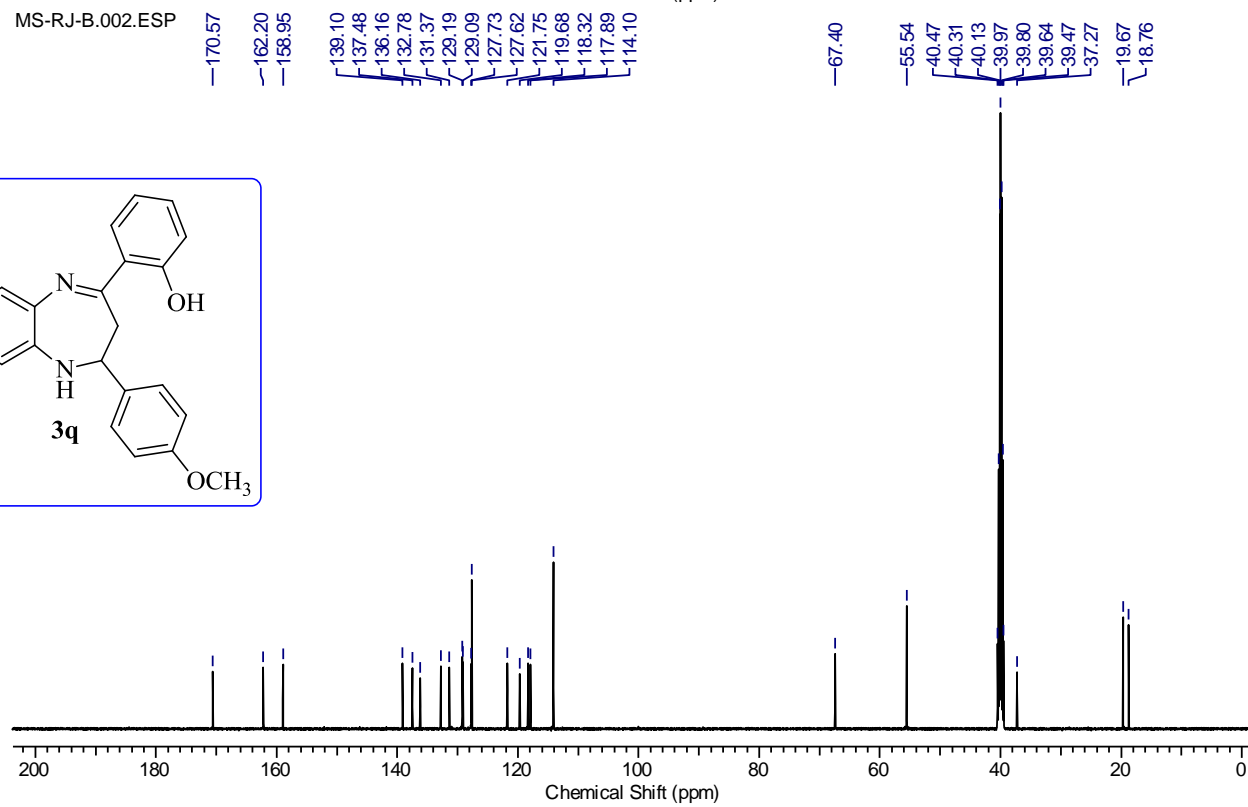

1H RJ-A.001.ESP

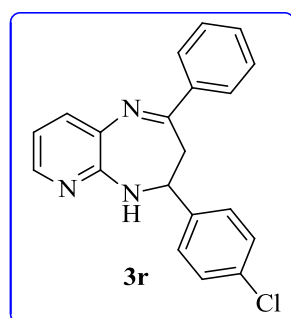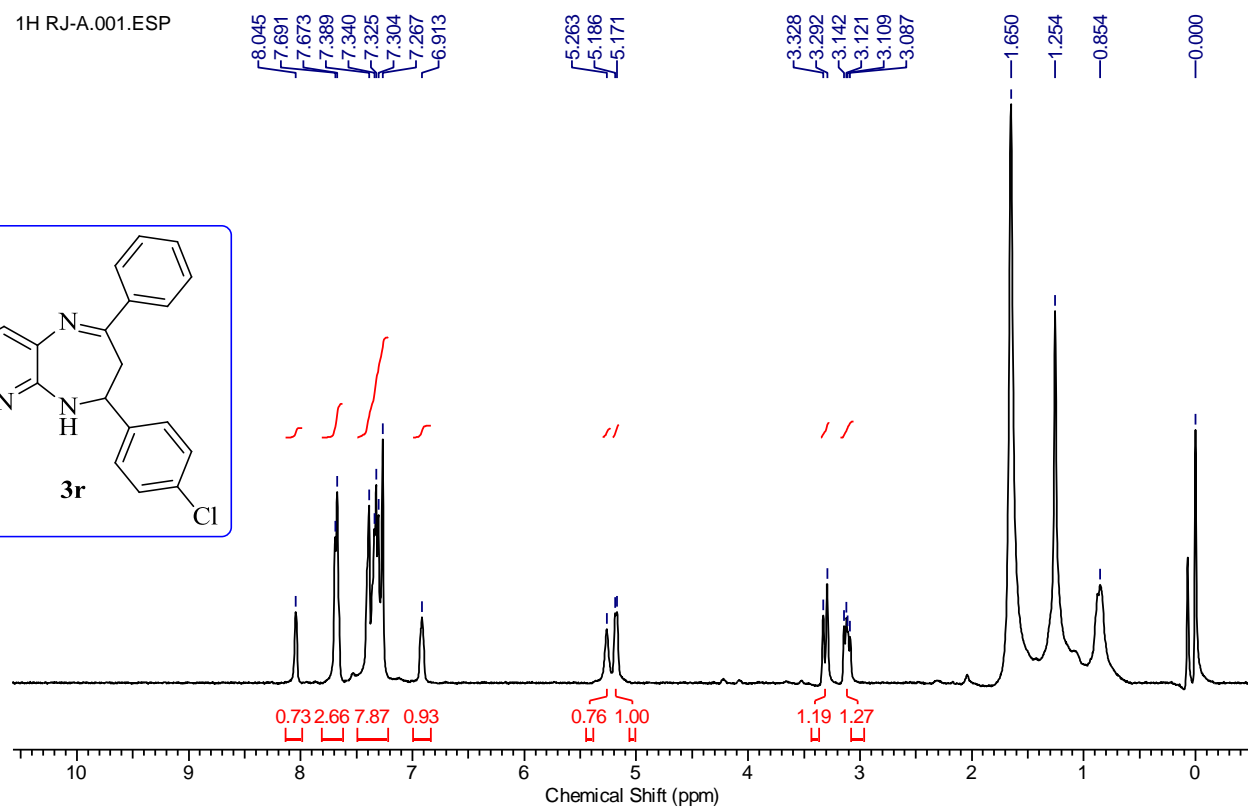

13C RJ-191.001.ESP

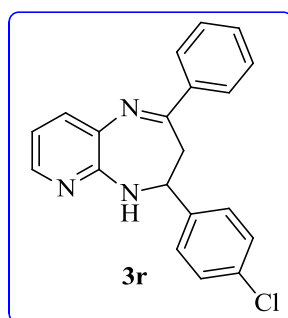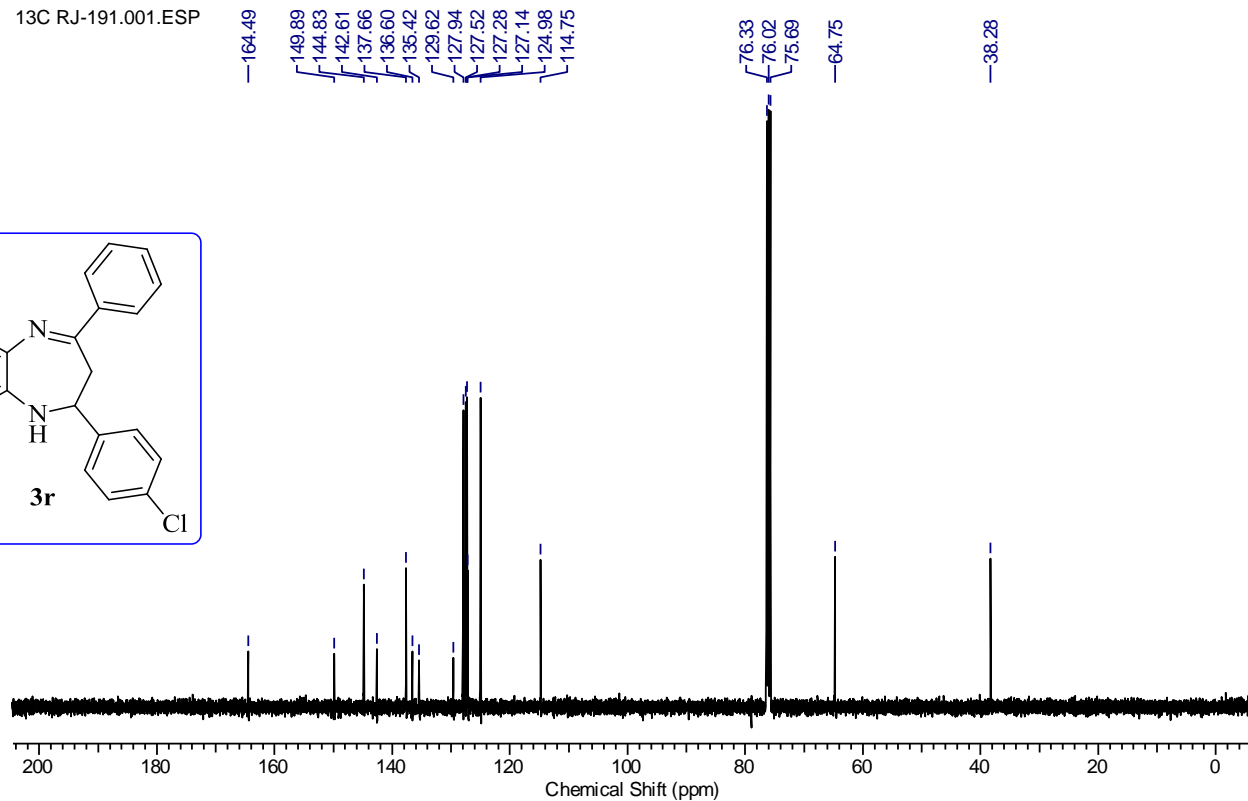

1H RJ-184.001.ESP

8.033  
7.764  
7.746  
7.465  
7.447  
7.404  
7.392  
7.374  
7.304  
7.282  
7.264  
6.928

5.186  
5.165  
5.080

3.331  
3.325  
3.295  
3.121  
3.100  
3.087  
3.066

1.626  
1.254

0.070  
0.000

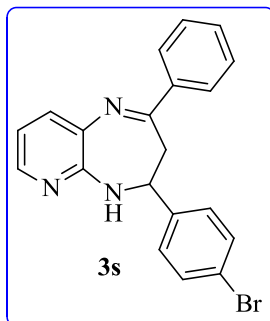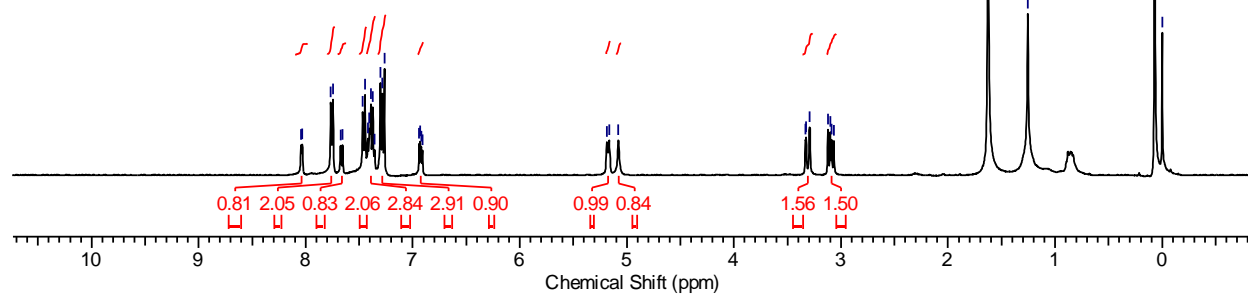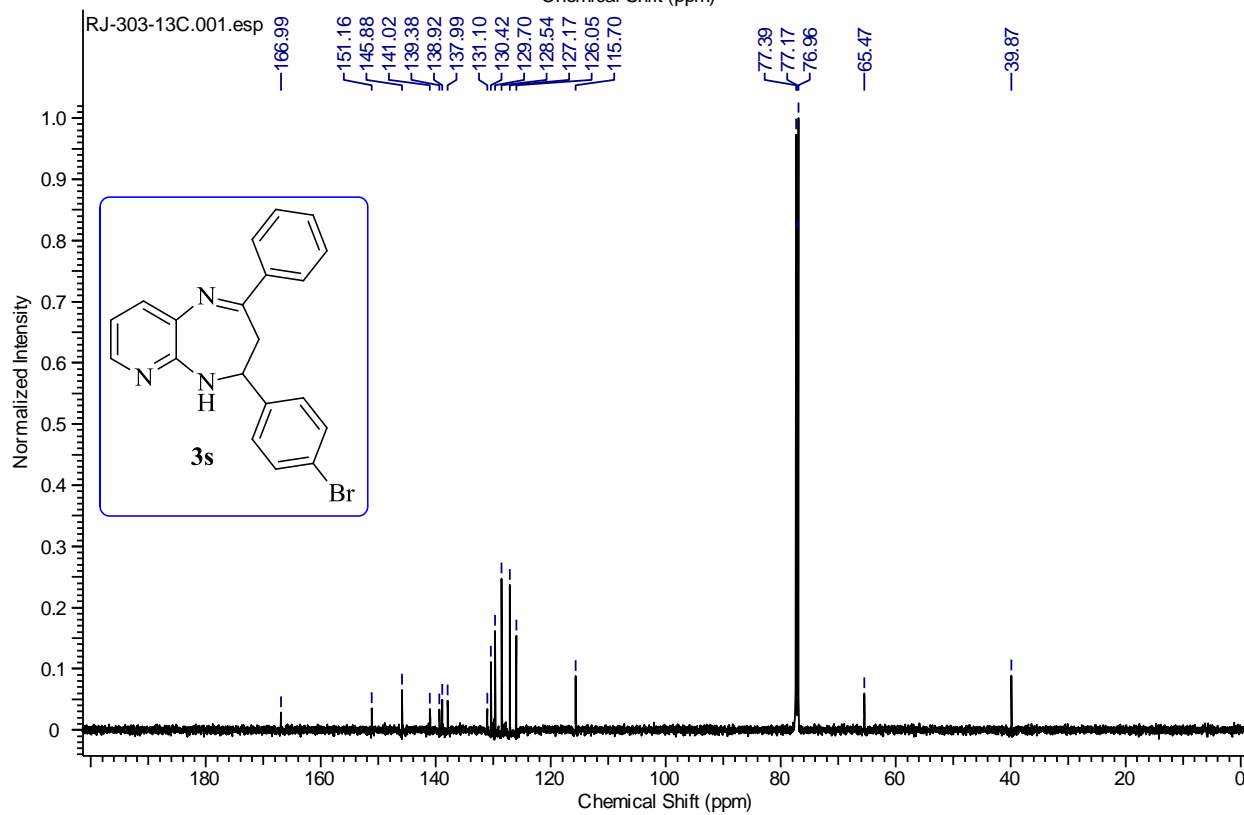

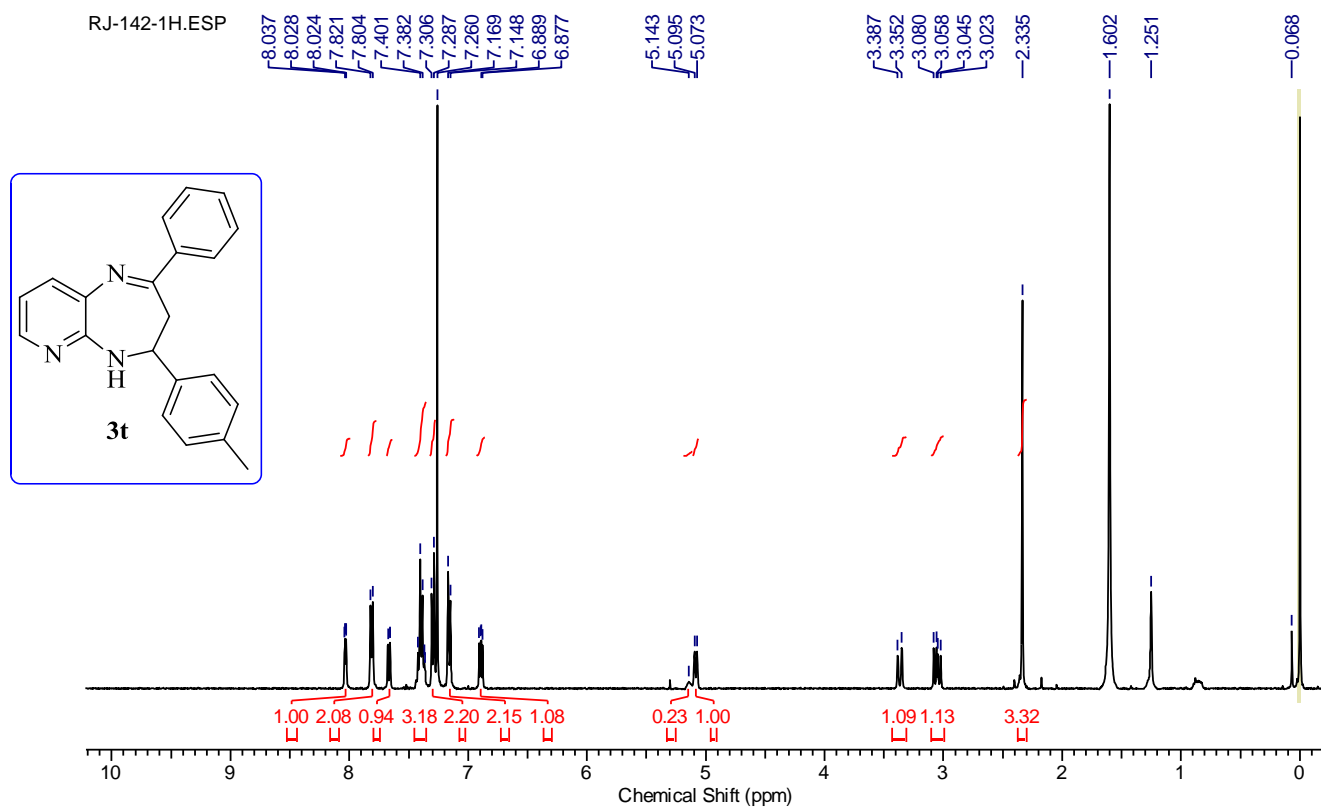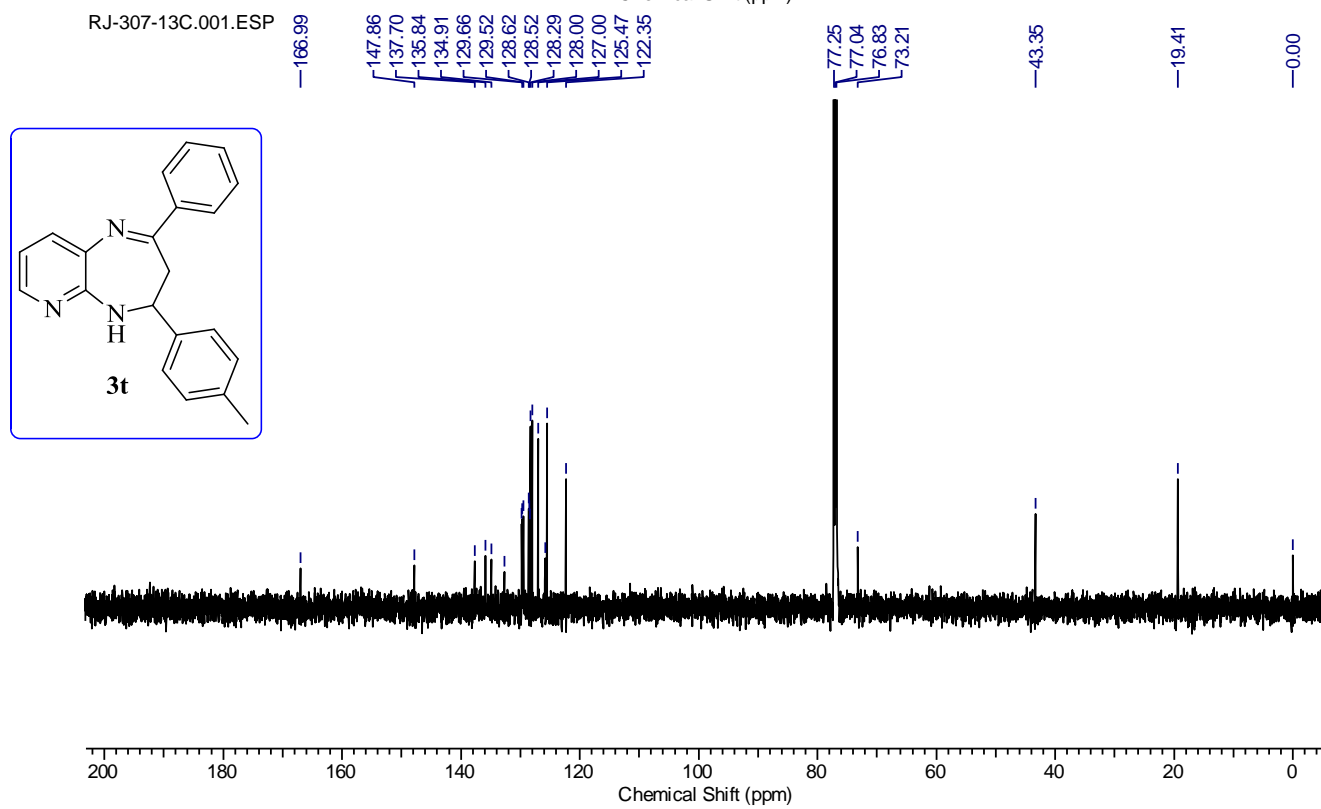

1H 178.001.ESP

8.051  
7.697  
7.676  
7.410  
7.392  
7.361  
7.343  
7.325  
7.304  
7.285  
7.264  
6.910  
5.177  
5.159  
5.137  
3.325  
3.292  
3.127  
3.109  
3.093  
3.072  
1.602  
1.254  
0.070  
0.000

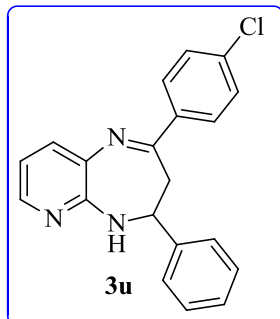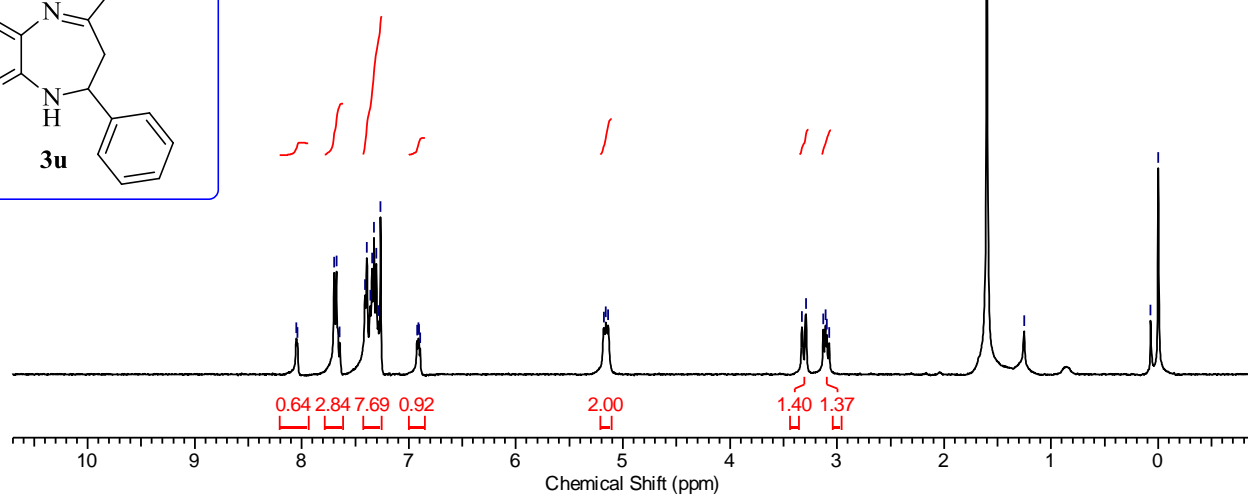

13C RJ-179A.001.ESP

165.40  
151.00  
146.27  
143.77  
138.48  
137.67  
136.42  
130.58  
128.97  
128.55  
128.31  
128.17  
126.02  
115.86  
77.36  
77.04  
76.73  
65.91  
39.30

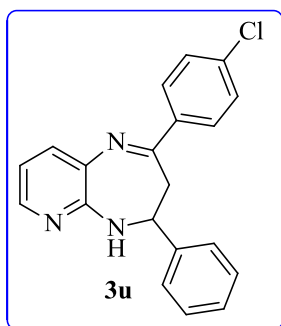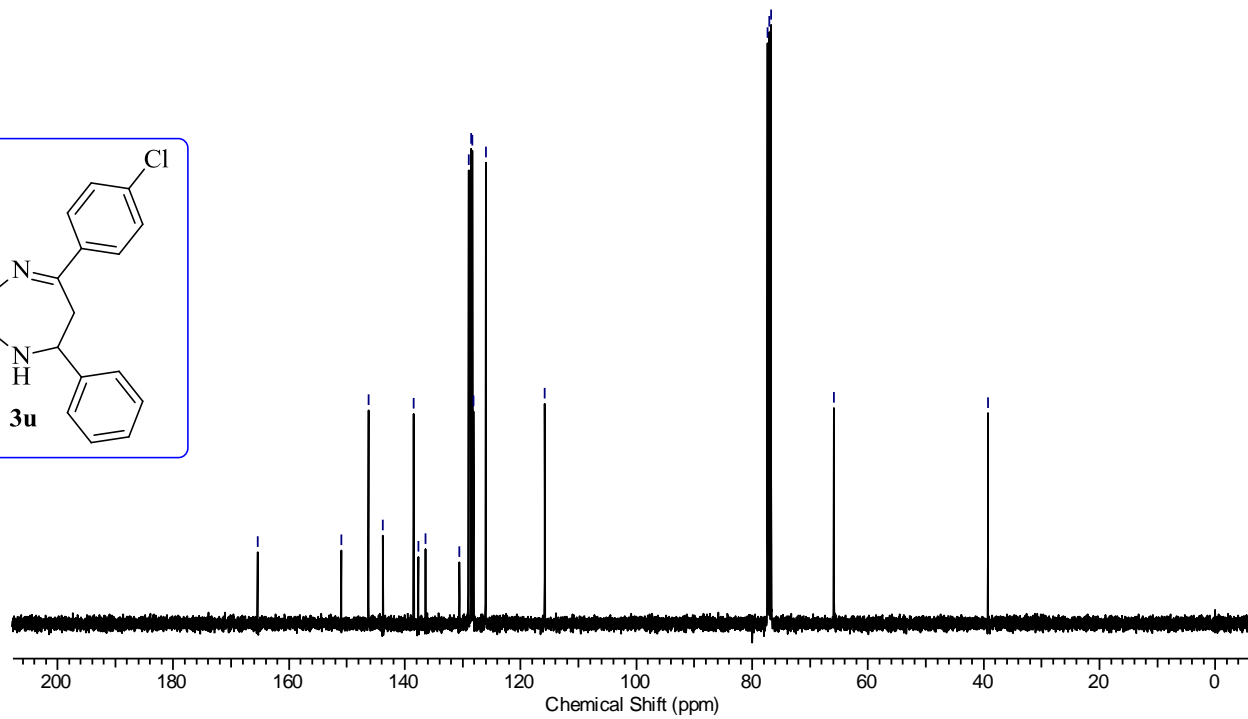

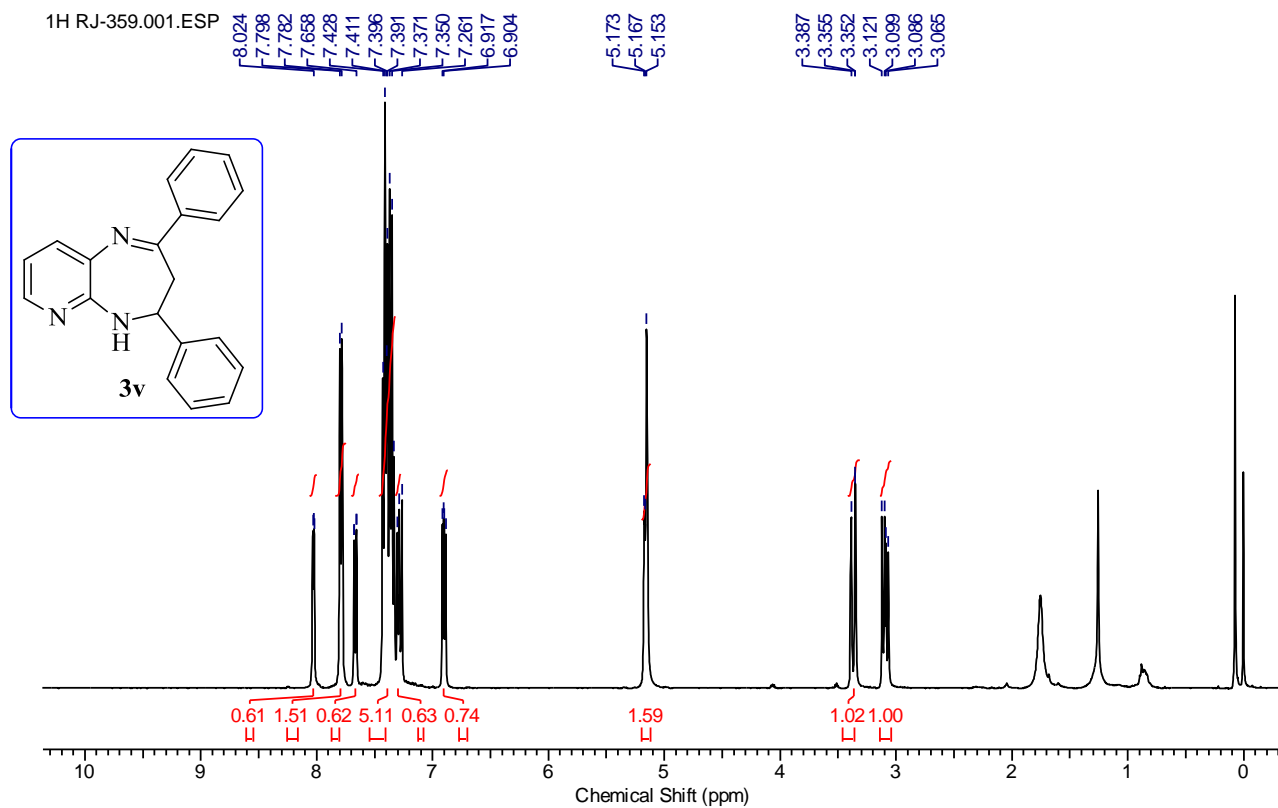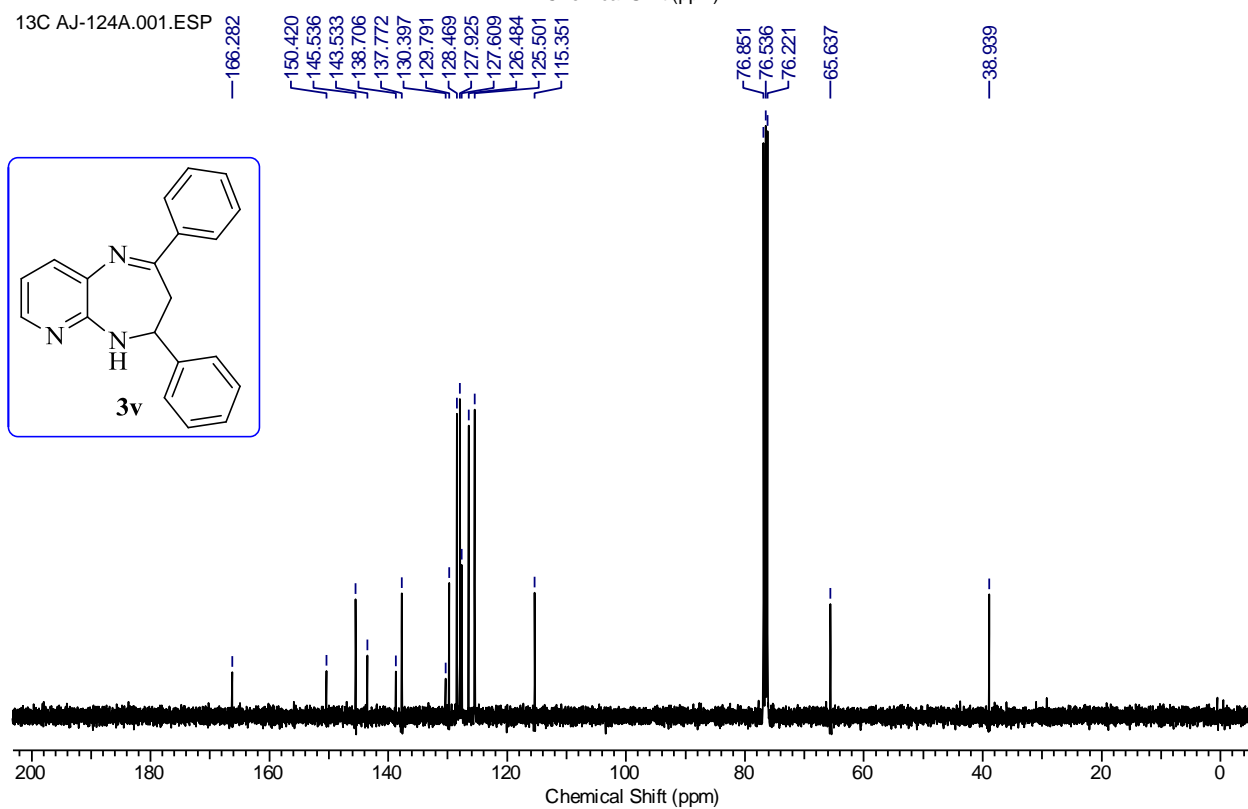

1H RJ-334.001.ESP

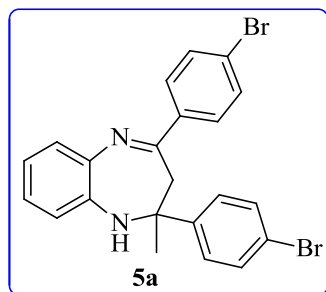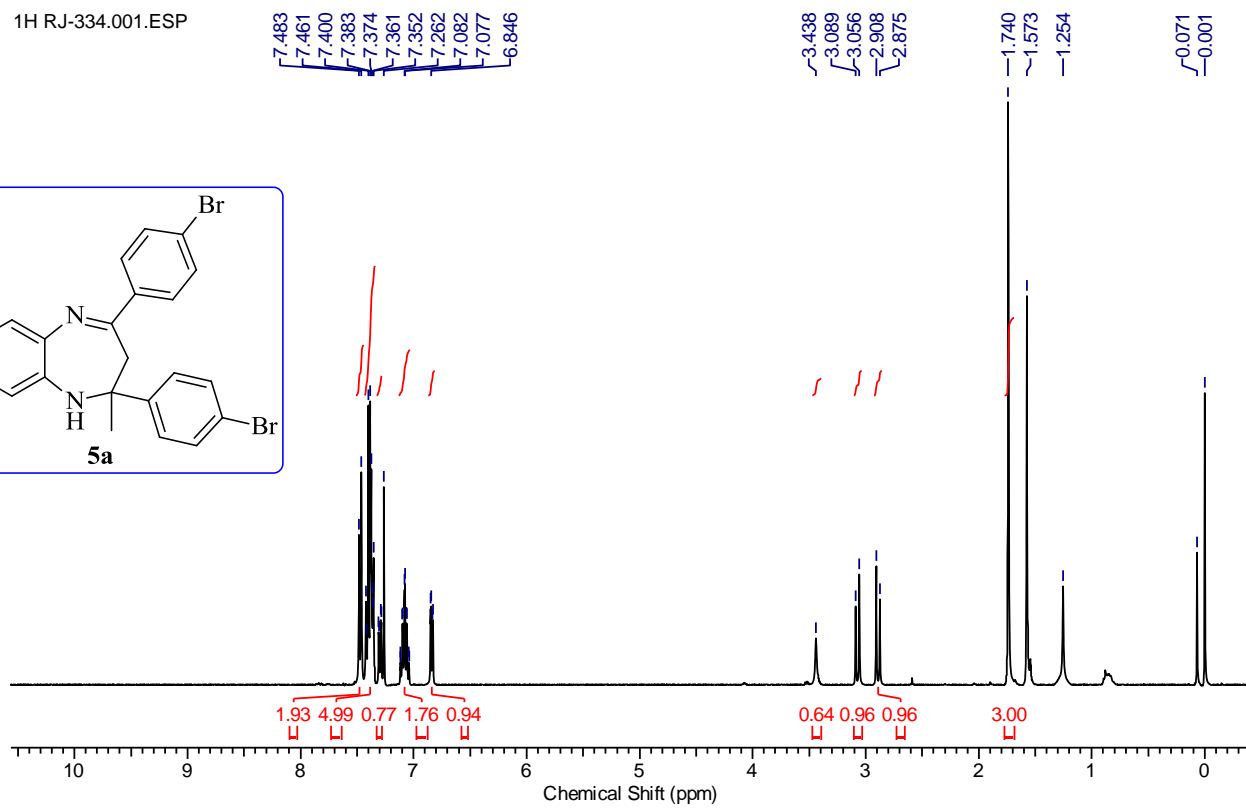

13C RJ-334.001.ESP

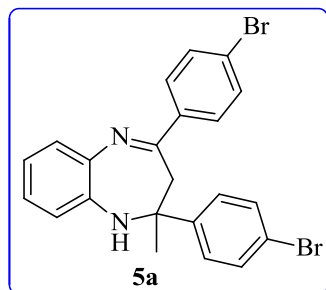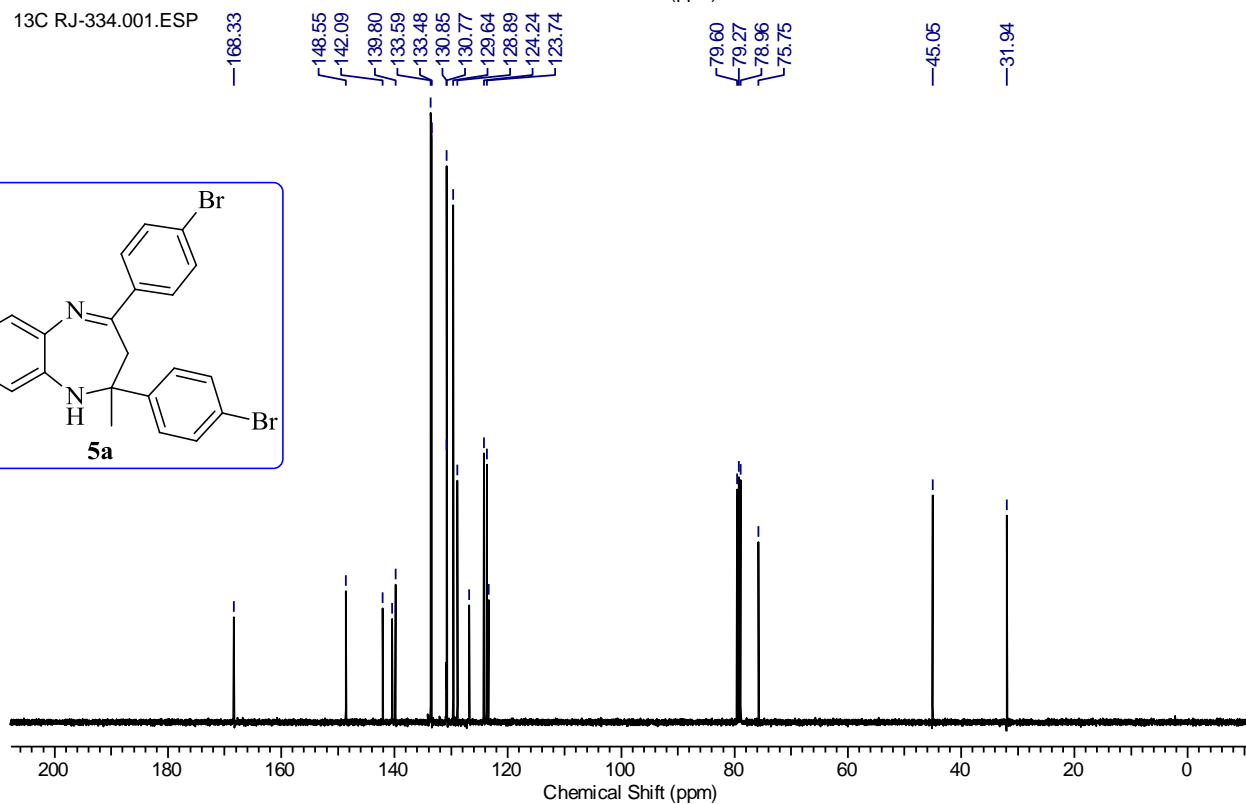



1H RJ-335.001.ESP

7.567  
7.547  
7.495  
7.475  
7.258  
7.097  
7.089  
7.076  
7.069  
7.045  
6.8283.511  
3.089  
3.056  
2.988  
2.955  
2.335  
2.299  
1.726  
1.587  
1.254  
0.071  
-0.000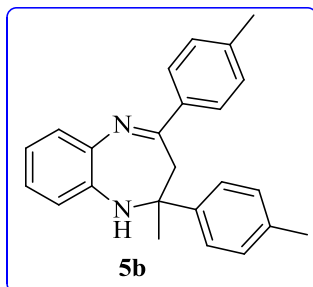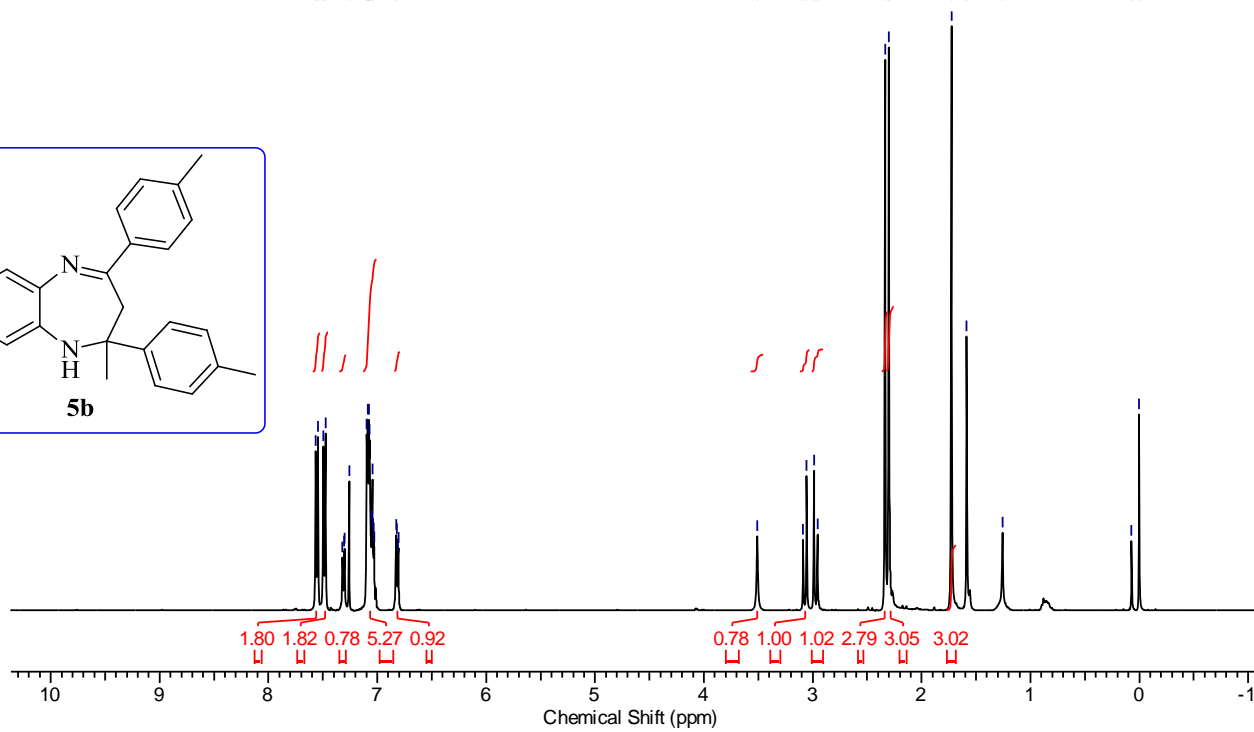

13C RJ-335.001.ESP

169.80  
147.25  
142.58  
142.21  
140.45  
131.21  
131.06  
130.72  
129.38  
128.34  
127.42  
123.85  
123.6679.58  
79.26  
78.95  
75.6145.04  
32.10  
23.54  
23.12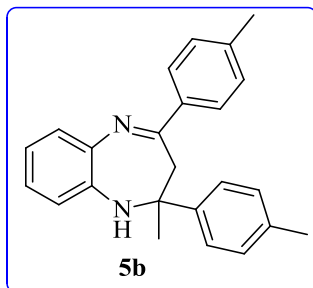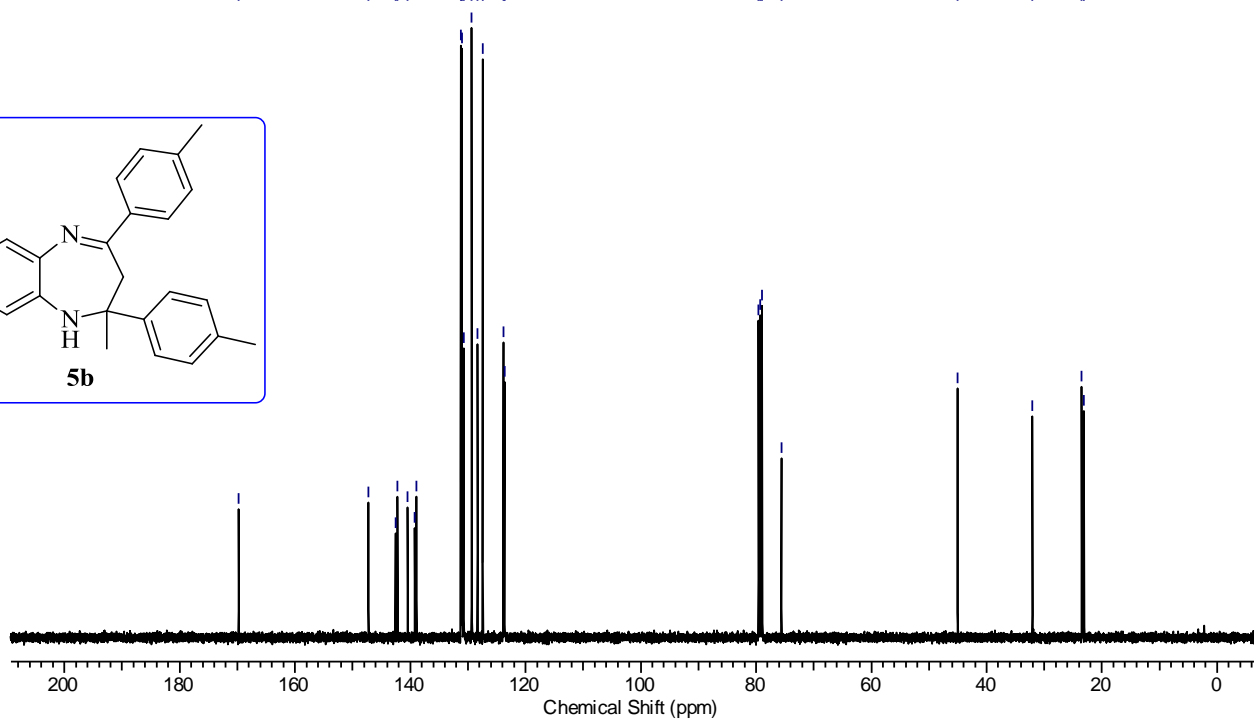

1H RJ-312C.001.ESP

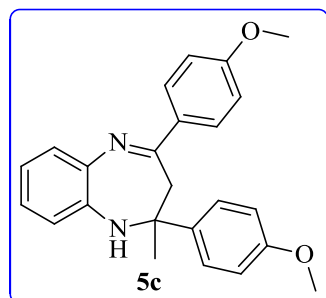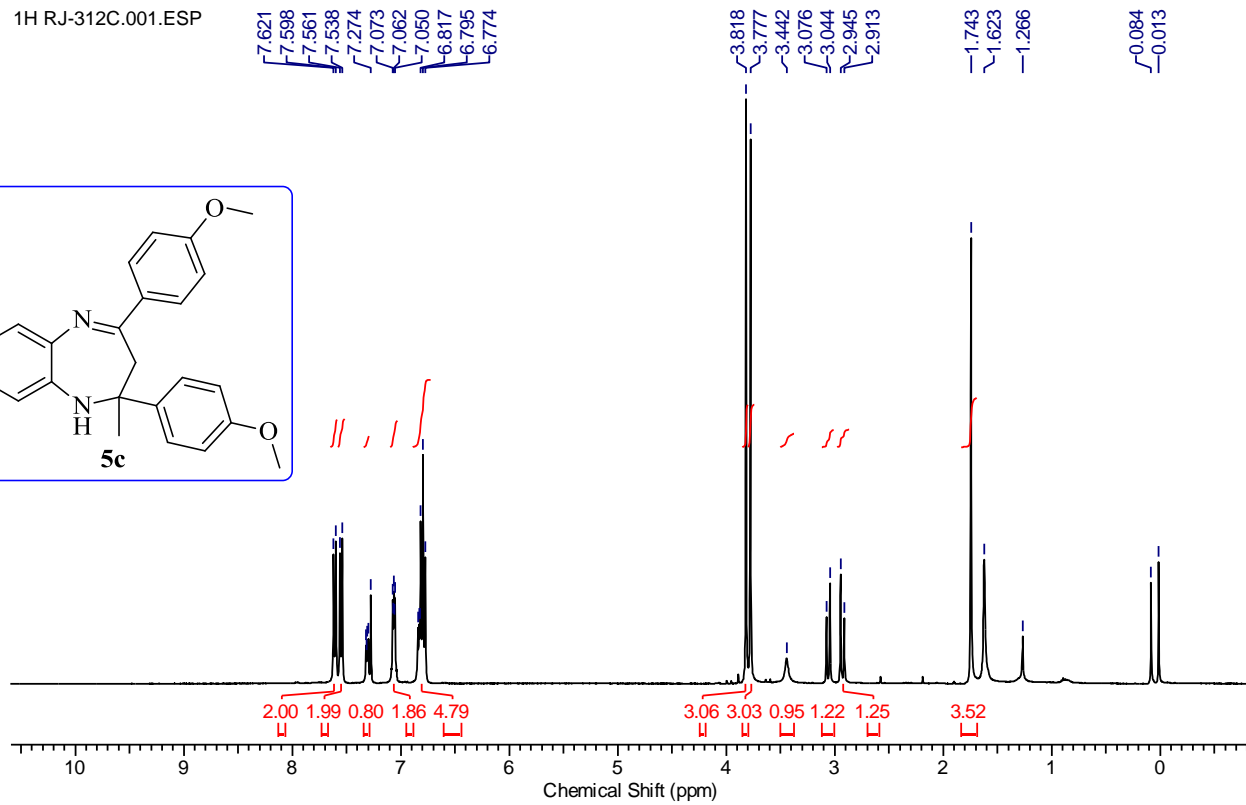

13C RJ-322.001.ESP

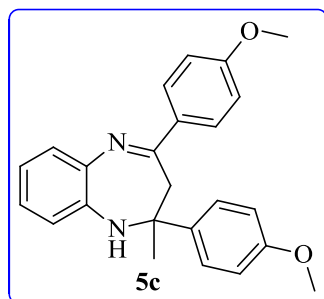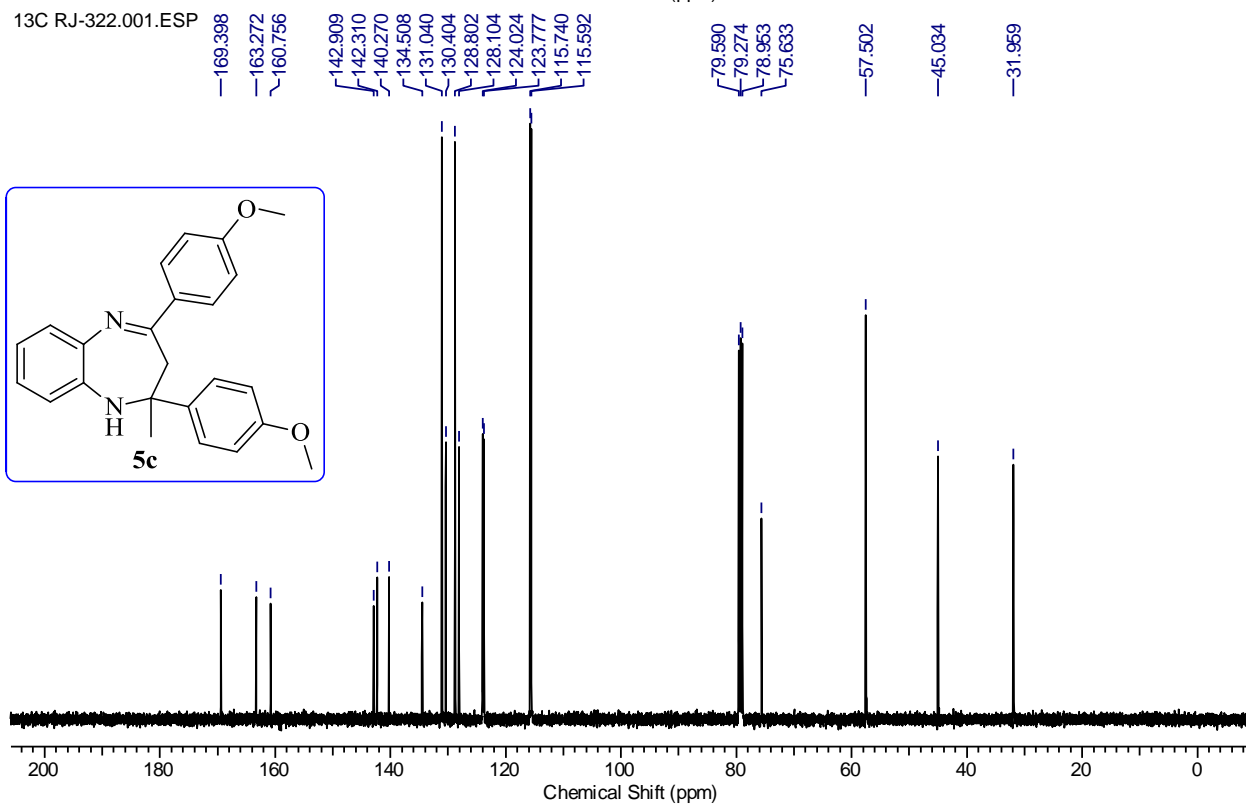

1H RJ-311C.001.ESP

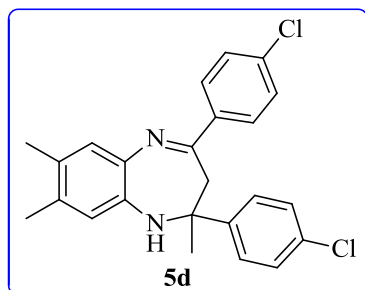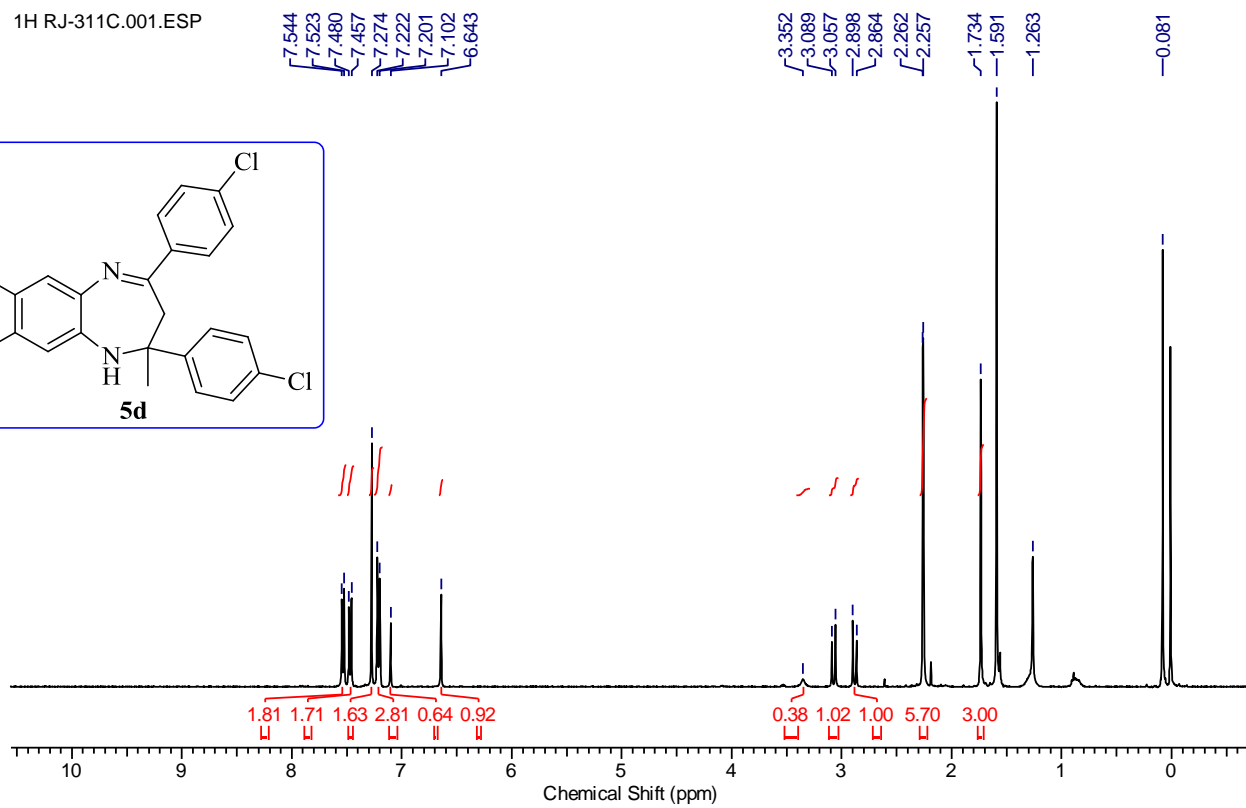

13C RJ-333.001.ESP

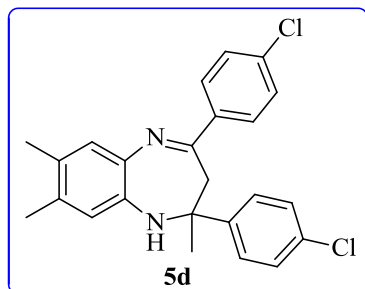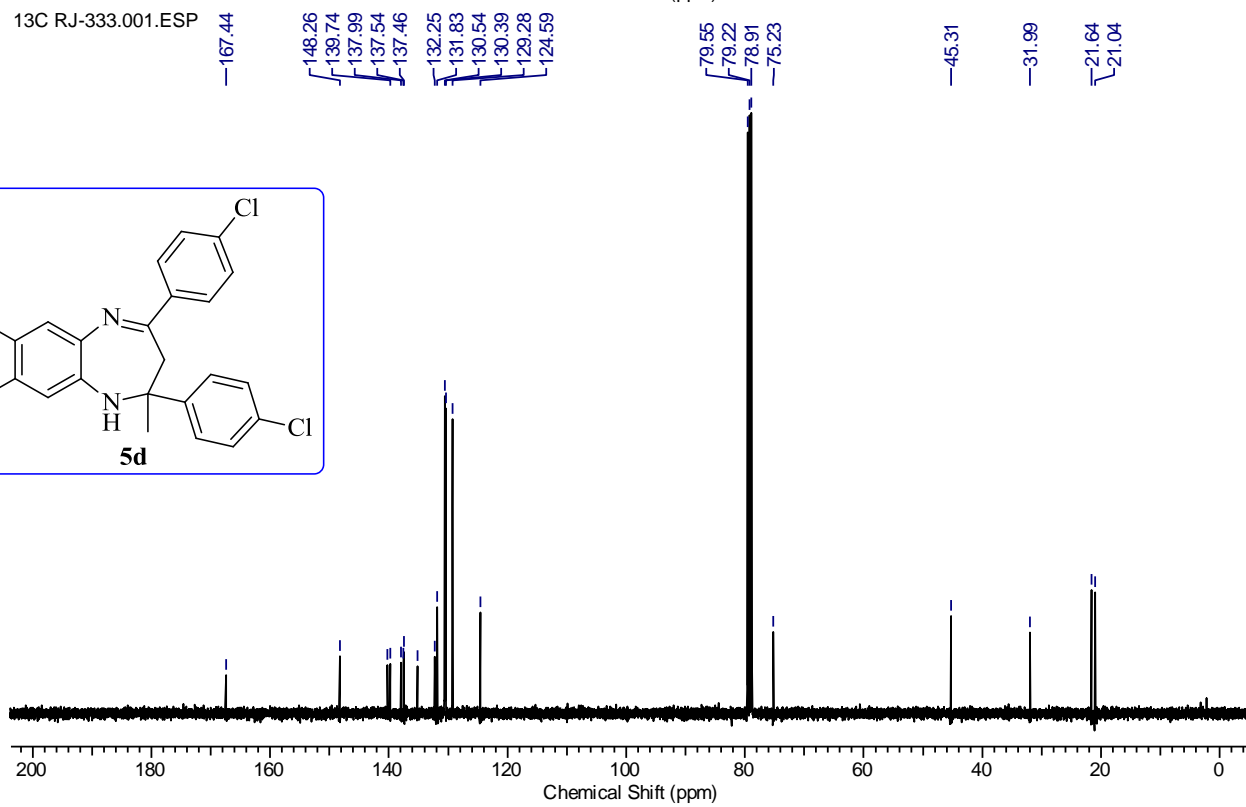

1H RJ-337.001.ESP

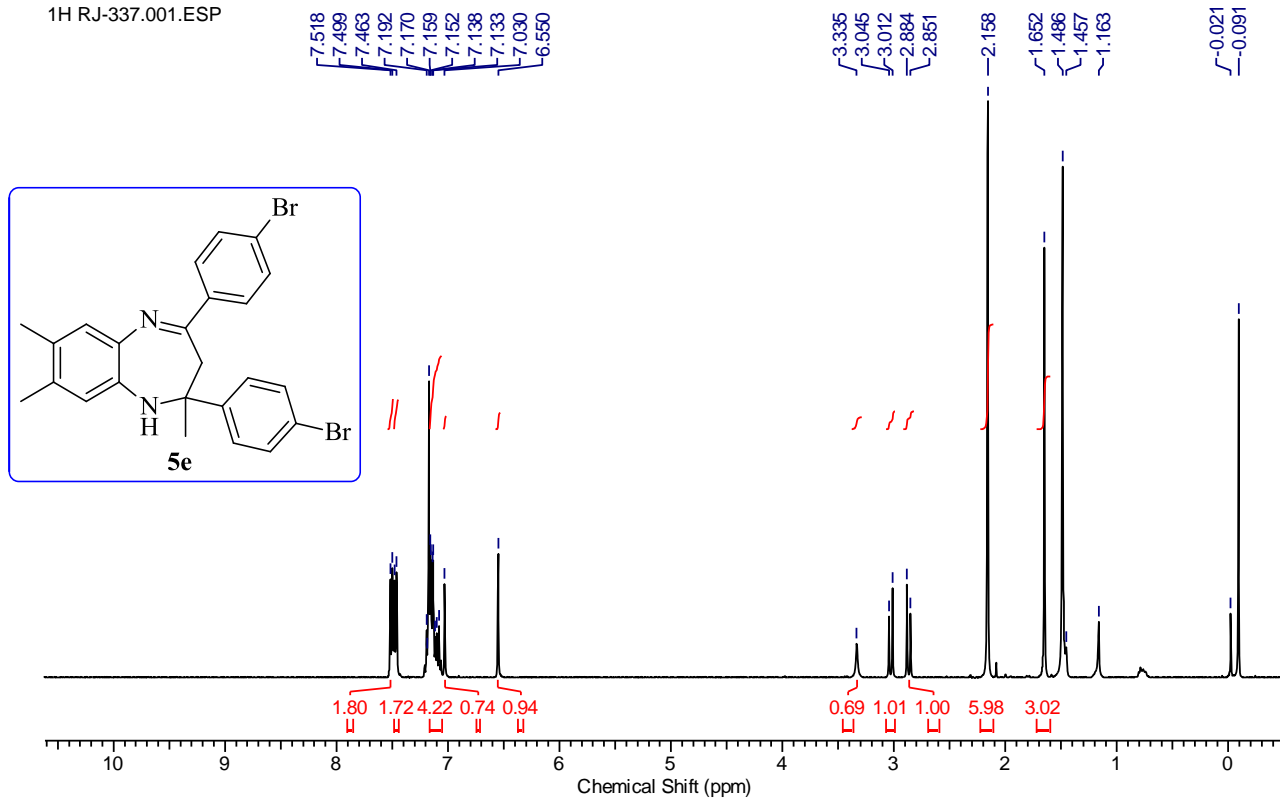

13C RJ-337.001.ESP

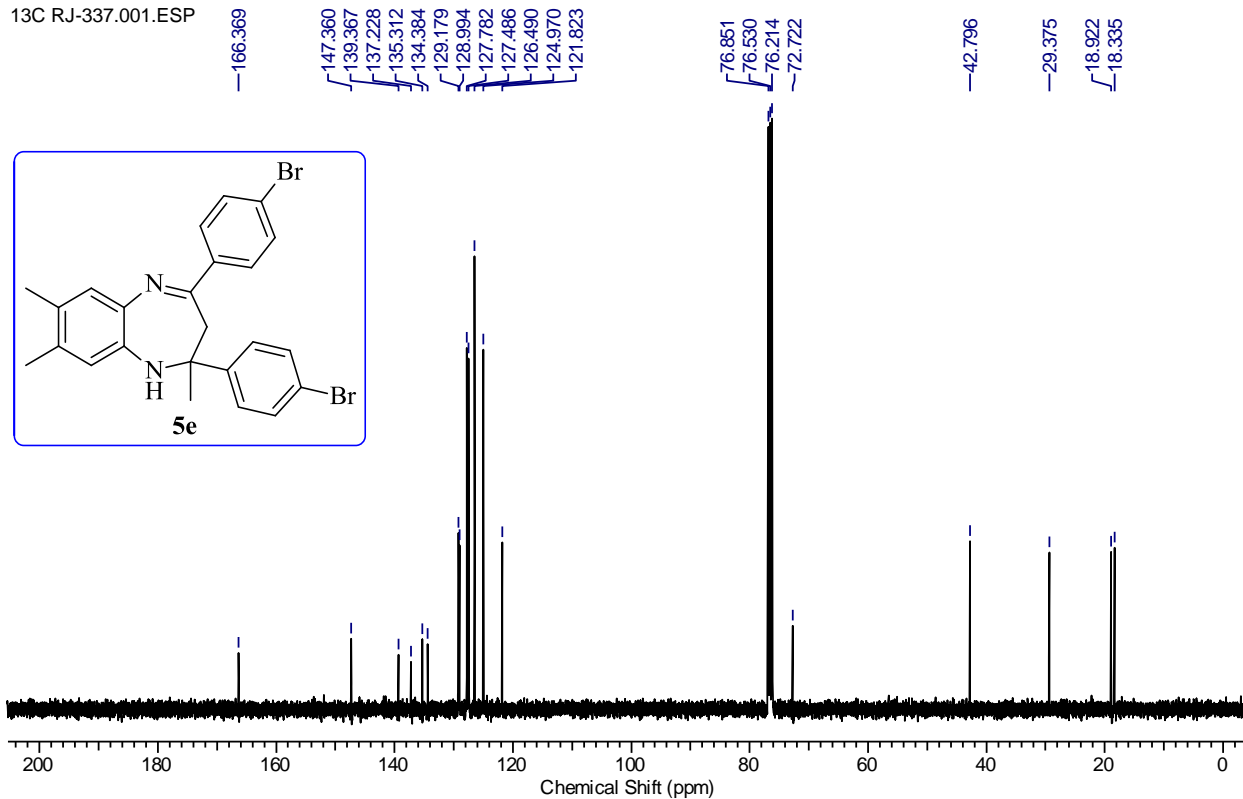

1H RJ-313C.001.ESP

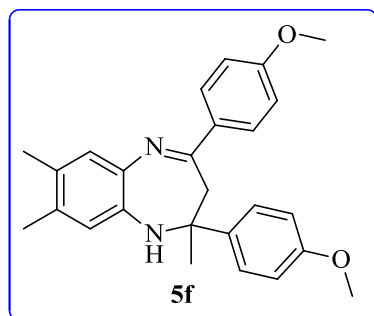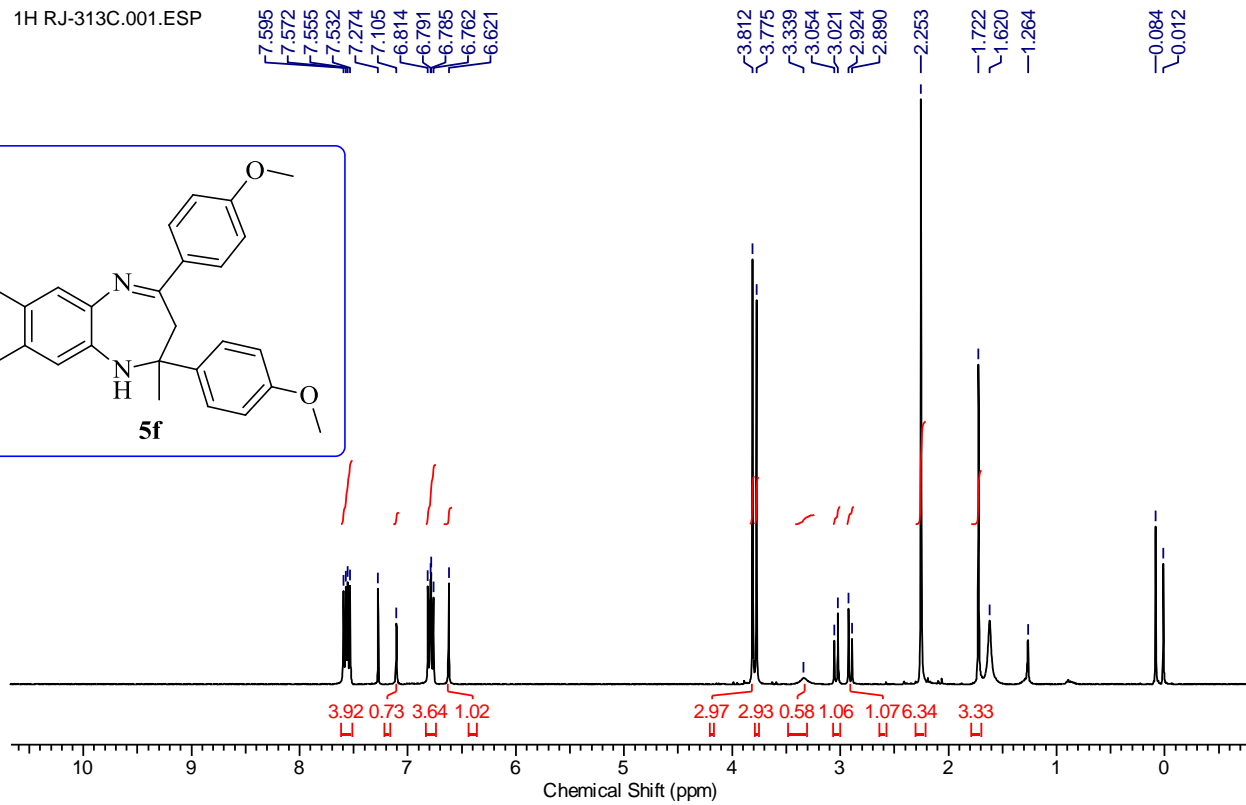

13C RJ-321.001.ESP

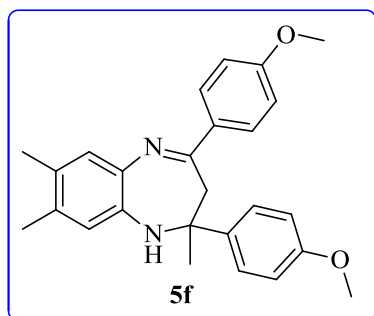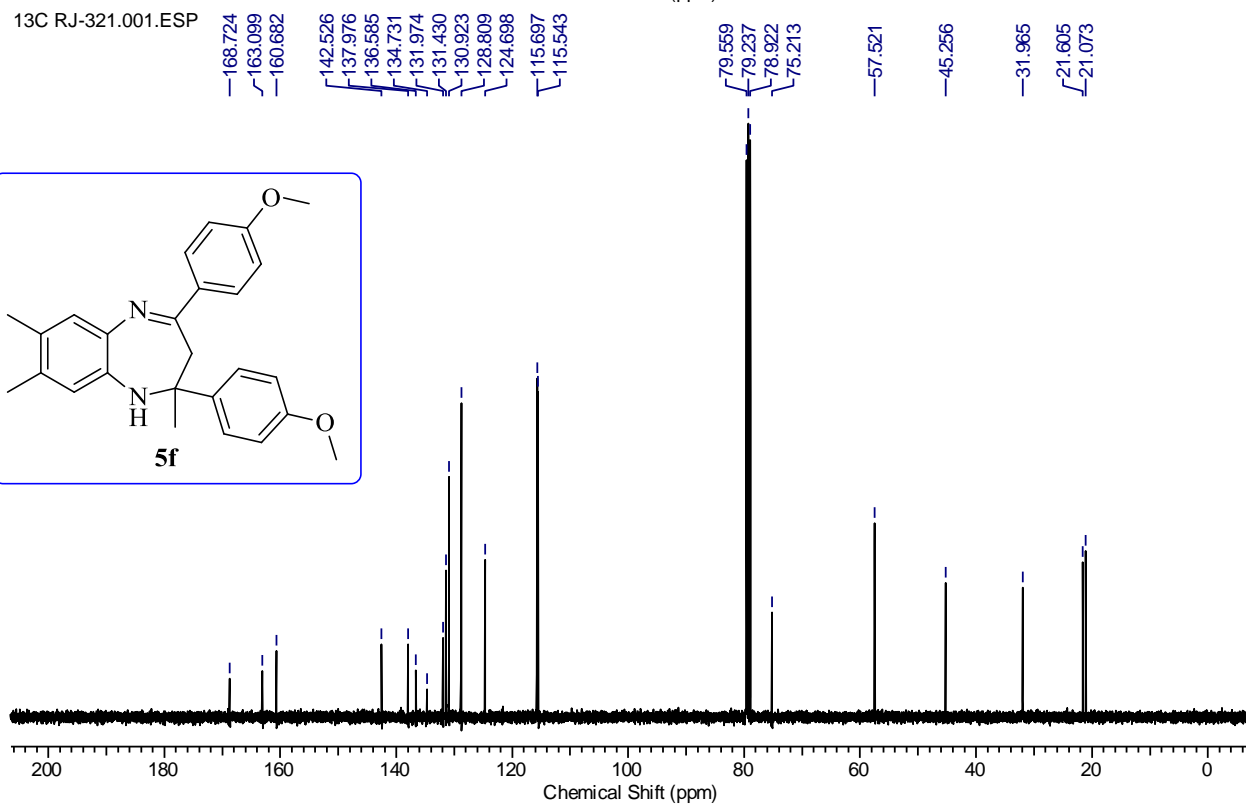

1H RJ-336.001.ESP

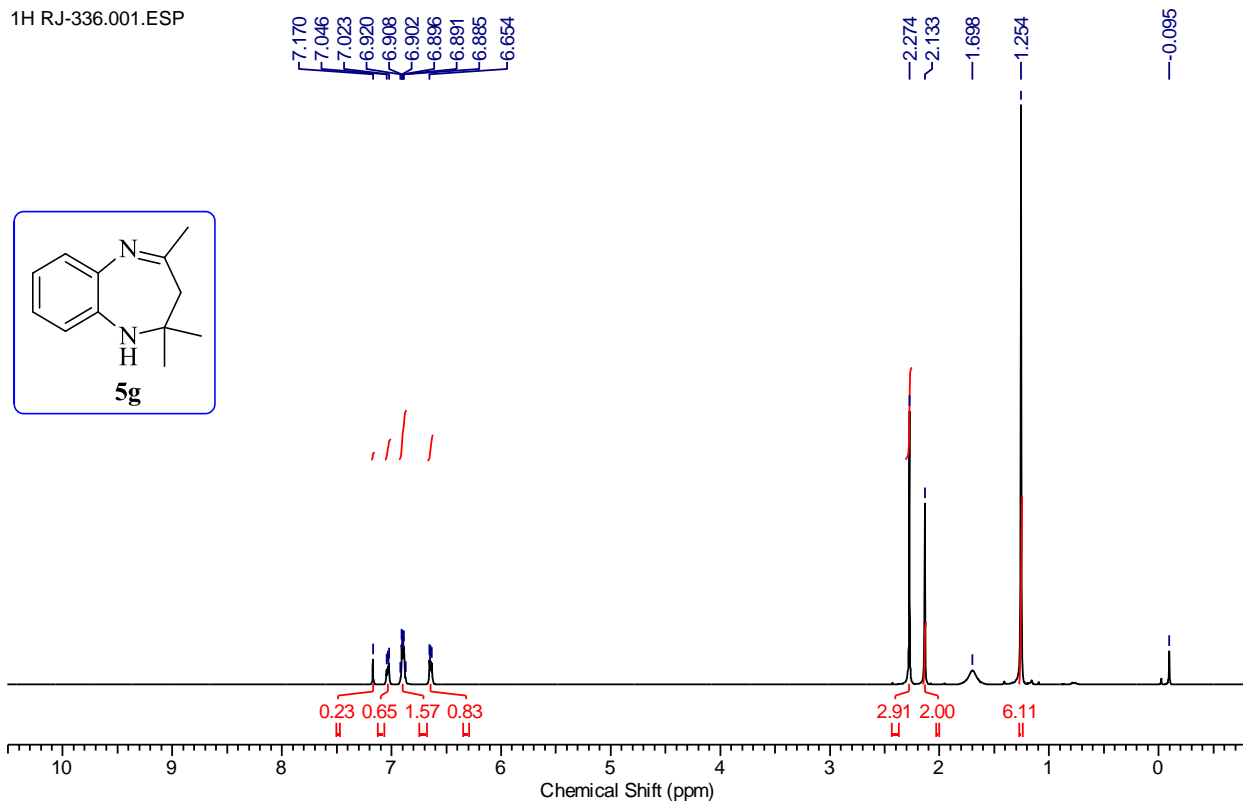

13C RJ-336.001.ESP

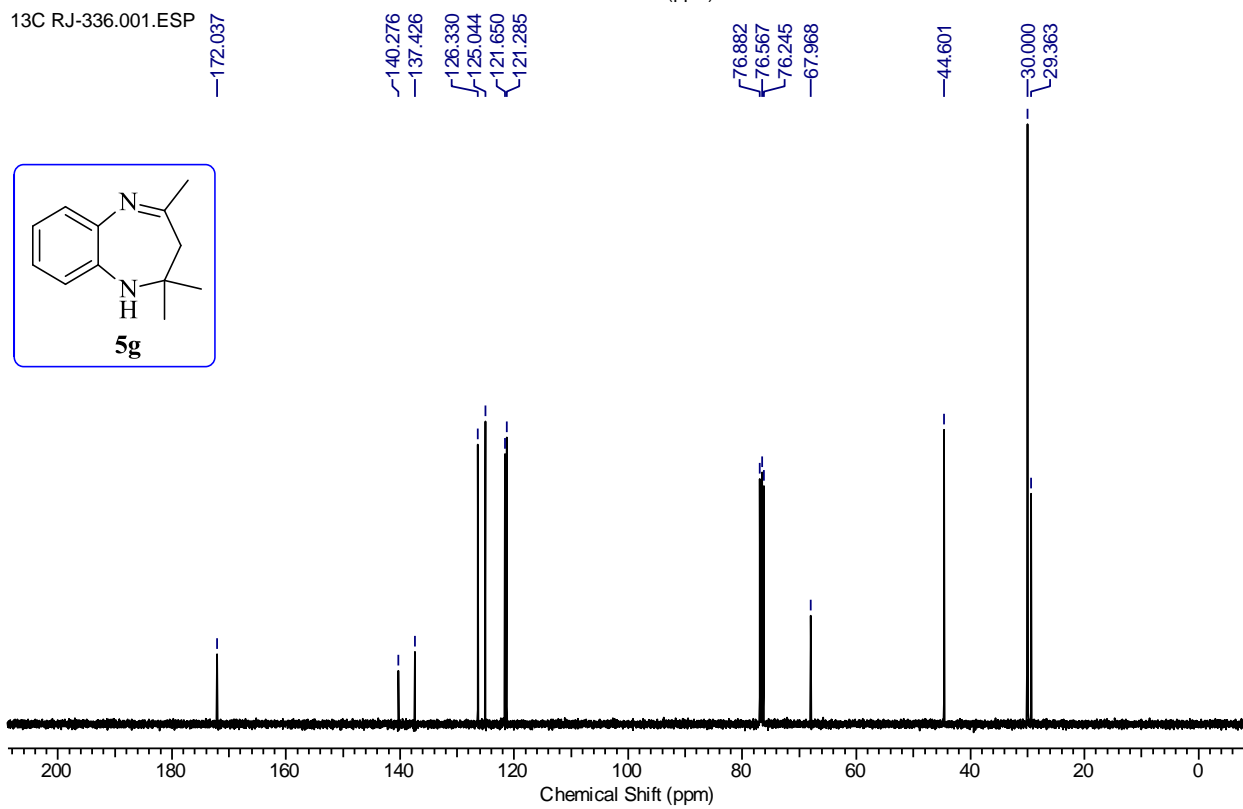

Supplement: c6gc03110b1.pdf [file c6gc03110b1.pdf]
